# Supplementary material
Source: Royal Society of Chemistry journal article supplement (doi:10.1039/d6ob00603e)
Supplement: d6ob00603e1.pdf [file d6ob00603e1.pdf]

Supporting Information

## Enantioselective Synthesis of Chiral 1,2-Oxazinane Spiro-oxindoles via Carbene-Catalyzed [3+3] Annulation of Isatin-Derived Nitrones with Enals

Yu Miao <sup>a</sup>, Yang Xiao <sup>a</sup>, Xulin Han <sup>c</sup>, Yao Chen <sup>a</sup>, Feilong Cao <sup>a</sup>, Hongzhi Zhuang <sup>a</sup>, Chunsheng Lin <sup>a</sup>, Yanli Jin <sup>c</sup>, Jianfeng Xu <sup>b,\*</sup>, Xingkuan Chen <sup>a,\*</sup>

State Key Laboratory of Bioactive Molecules and Druggability Assessment, Jinan University; Department of Chemistry, College of Chemistry and Materials Science, Jinan University, Guangzhou, 510632, P. R. China; Key Laboratory of Surface & Interface Science of Polymer Materials of Zhejiang Province, School of Chemistry and Chemical Engineering, Zhejiang Sci-Tech University, Hangzhou 310018, P. R. China; College of Pharmacy, Jinan University, Guangzhou 510632, P. R. China

Email: [xkchen@jnu.edu.cn](mailto:xkchen@jnu.edu.cn); [jfxu@zstu.edu.cn](mailto:jfxu@zstu.edu.cn)

### Table of Contents

|     |                                                                    |    |
|-----|--------------------------------------------------------------------|----|
| I   | General information                                                | S2 |
| II  | Preparation of substrates                                          | S3 |
| III | General procedure for the catalytic synthesis of products <b>3</b> | S4 |
| IV  | Synthetic transformations of the product <b>3a</b> and <b>4</b>    | S5 |
| V   | Stereochemistry determination by X-ray crystallographic analysis   | S6 |
| VI  | Characterizations of products                                      | S8 |

|     |                                                                       |     |
|-----|-----------------------------------------------------------------------|-----|
| VII | <sup>1</sup> H, <sup>13</sup> C, <sup>19</sup> F NMR and HPLC spectra | S25 |
|-----|-----------------------------------------------------------------------|-----|

### **I. General information:**

Commercially available materials purchased from reagent company were used as received, except aldehydes that were purified via distillation or column chromatography prior to use. Proton nuclear magnetic resonance (<sup>1</sup>H NMR) spectra were recorded on a Bruker (400 MHz) spectrometer. Chemical shifts were recorded in parts per million (ppm,  $\delta$ ) relative to chloroform ( $\delta = 7.26$ , singlet). <sup>1</sup>H NMR splitting patterns are designated as singlet (s), doublet (d), triplet (t), quartet (q), dd (doublet of doublets), m (multiplets), and etc. All first-order splitting patterns were assigned on the basis of the appearance of the multiplet. Splitting patterns that could not be easily interpreted are designated as multiplet (m) or broad (br). Carbon nuclear magnetic resonance (<sup>13</sup>C NMR) spectra were recorded on a Bruker (400 MHz) (101 MHz) spectrometer. High resolution mass spectrometry (HRMS) analysis was performed using electrospray ionization (ESI) with a quadrupole-time of flight (QTOF) mass analyzer. The determination of er was performed via chiral HPLC analysis using Agilent G7129A HPLC workstation. X-ray crystallography analysis was performed on XtaLAB PRO X-ray diffraction meter. Analytical thin-layer chromatography (TLC) was carried out on GF254 pre-coated silica gel plate (0.2 mm thickness). Visualization was performed using a UV lamp.

## II. Preparation of hydroxylamine derivatives <sup>[1-3]</sup>:

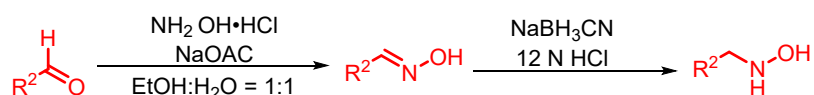

Dissolve the aldehyde compound (10 mmol) and hydroxylamine hydrochloride (0.83 g, 12 mmol, 1.2 eq) in 20 mL of ethanol-water mixed solvent (1:1), then add sodium acetate (1.64 g, 20 mmol). Stir the reaction solution until the aldehyde compound is completely consumed. After evaporating the solvent, perform liquid-liquid extraction of the residue with ethyl acetate and water. Wash the aqueous layer with ethyl acetate (2×50 mL). Combine the organic layers, dry over anhydrous sodium sulfate, filter, and concentrate to obtain the oxime compound, which can be used in the next reaction without further purification.

Suspend the oxime compound obtained in the above steps in methanol (20 mL), add sodium cyanoborohydride (0.75 g, 12 mmol, 1.2 eq), and then slowly add 12 N hydrochloric acid (8.3 mL, 100 mmol, 10 eq) at 0°C. After stirring at room temperature for 4 h, pour the reaction mixture into water and neutralize to neutral at 0 °C with potassium hydroxide pellets. Then perform an extraction operation, extract the organic phase with ethyl acetate, wash the organic phase sequentially with saturated brine, dry over anhydrous sodium sulfate, and finally concentrate to obtain the crude product. Most of the hydroxylamine product can be used directly without further purification. If necessary (determined by <sup>1</sup>H NMR), the crude product can be purified by silica gel column chromatography (hexane/EtOAc = 3:1 to 1:1).

## Synthesis of oxime derivatives <sup>[4-7]</sup>:

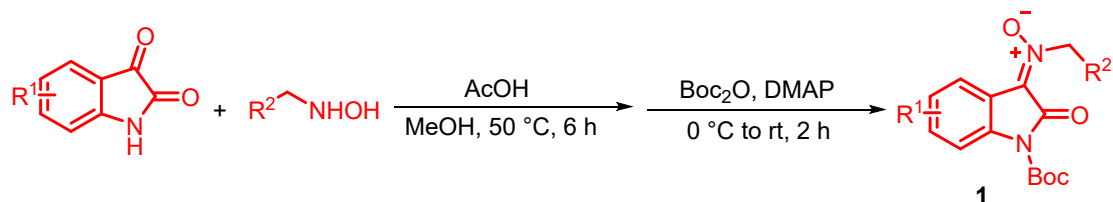

Dissolve isatin (1.0 mmol) and hydroxylamine (1.1 mmol) in 4 mL of methanol, then add acetic acid (57.2 μL, 1.0 mmol). Stir the reaction mixture at 50°C for 6 h. After the reaction is complete, cool the mixture to room temperature and filter; wash the collected yellow solid with methanol and petroleum ether to obtain N-(2-oxoindolin-3-ylidene)methylamine oxide.

Dissolve N-(2-oxoindolin-3-ylmethyl)amine oxide (0.8 mmol) and di-tert-butyl dicarbonate (0.18 mL, 0.88 mmol) in 10 mL of dichloromethane and cool the reaction mixture to 0°C. Then add 4-dimethylaminopyridine (9.8 mg, 0.08 mmol), stir at room temperature for 2 h, and monitor the reaction progress by TLC. After the reaction is complete, quench with 1 M hydrochloric acid, then extract with dichloromethane (3×10 mL). Combine the organic layers, wash with saturated brine, dry over anhydrous sodium sulfate, and concentrate under vacuum. Purify by quick silica gel column chromatography to obtain the yellow solid oxime product **1**.

### III. General procedure for the catalytic synthesis of products 3

#### Synthesis of racemic product:

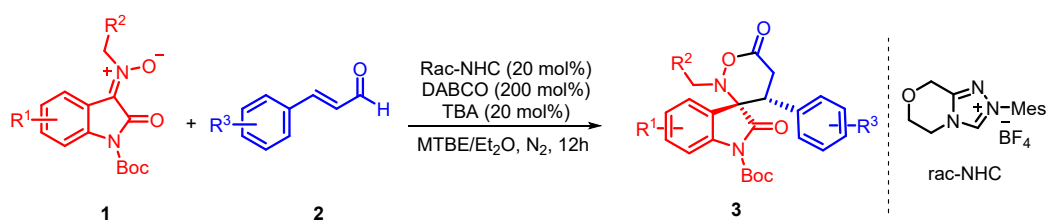

In a 25 mL dried Schlenk tube equipped with a magnetic stirrer, add substrate **1** (0.1 mmol), substrate **2** (0.2 mmol), DABCO (21.2 mg, 0.2 mmol), and Rac-NHC (8.4 mg, 0.02 mmol) sequentially, then perform three N<sub>2</sub> evacuation-refill cycles. At room temperature, add the additive tert-butanol (4.75  $\mu$ L, 0.05 mmol) and 1 mL of dried MTBE or diethyl ether as the solvent, and continue stirring the reaction at this temperature for 12 h. Solvent was removed under reduced pressure, and the residue was purified via column chromatography on silica gel with hexane/EtOAc (3:1 ~ 7:1) as eluent to afford the products **3**.

#### Asymmetric Synthesis of **3**:

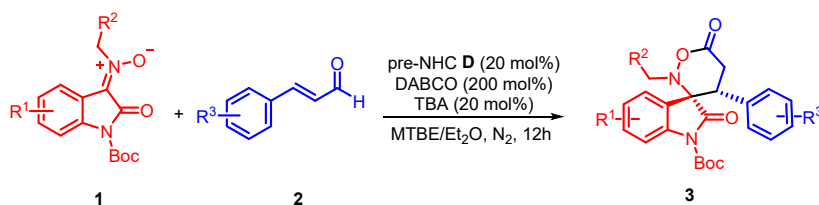

In a 25 mL dried Schlenk tube equipped with a magnetic stirrer, add substrate **1** (0.1 mmol), substrate **2** (0.2 mmol), DABCO (21.2 mg, 0.2 mmol), and pre-NHC **D** (8.4 mg, 0.02 mmol) sequentially, then perform three N<sub>2</sub> evacuation-refill cycles. At room temperature, add the additive tert-butanol (4.75  $\mu$ L, 0.05 mmol) and 1 mL of dried MTBE or diethyl ether as the solvent, and continue stirring the reaction at this temperature for 12 h. Solvent was removed under reduced pressure, and the residue was purified via column chromatography on silica gel with hexane/EtOAc (3:1 ~ 7:1) as eluent to afford the products **3**.

#### Scale-up reaction of **3a**:

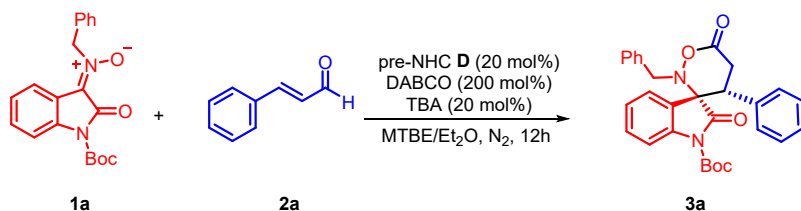

In a 50 mL flask equipped with a magnetic stirrer, add substrate **1a** (528 mg, 1.5 mmol), substrate **2a** (396 mg, 3.0 mmol), DABCO (336 mg, 3.0 mmol) and pre-NHC **D** (125.7 mg, 0.30 mmol) in sequence, and perform three cycles of evacuation and N<sub>2</sub> backfilling. At room temperature, add the additive tert-butanol (28.5  $\mu$ L, 0.30 mmol) and 15 mL of dry MTBE as the solvent, and continue stirring the reaction at this temperature for 12 h. Once the reaction is complete, Solvent was removed under reduced pressure, and the residue was purified via column chromatography on silica gel with hexane/EtOAc (7:1) as eluent

to afford the products **3a** (48.6 mg, 67% yield).

#### IV: Synthetic transformation of the product **3a** and **4**

##### Stepwise reaction:

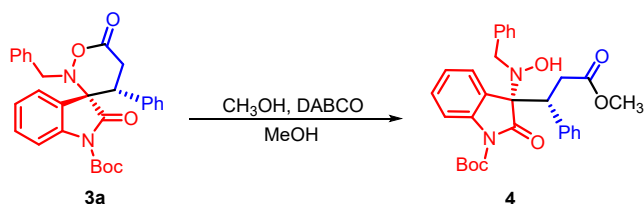

Put compound **3a** (50 mg, 0.1 mmol) in a reaction vial equipped with a magnetic stir bar, add methanol (4  $\mu$ L, 0.1 mmol) and DABCO (11.2 mg, 0.1 mmol), and add 1 mL of MTBE as the solvent, stirring at room temperature for 1 h. Solvent was removed under reduced pressure, and the residue was purified via column chromatography on silica gel with hexane/EtOAc =10:1 as eluent to afford the products **4** as a Colourless liquid (46 mg, 90% yield).

##### One-pot method:

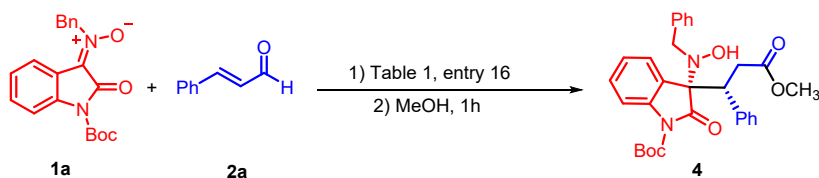

In a 25 mL dry Schlenk reaction tube equipped with magnetic stirrer, add substrate **1a** (0.1 mmol), substrate **2a** (0.2 mmol, 2.0 eq), DABCO (21.2 mg, 0.2 mmol, 2.0 eq) and pre-NHC **D** (6.4 mg, 0.02 mmol, 20 mol%) sequentially, and perform three cycles of N<sub>2</sub> evacuation and backfilling. At room temperature, add the additive tert-butanol (0.05 mmol, 20 mol%) and 1 mL dry MTBE as the solvent, and stir the reaction at this temperature for 12 h. After the reaction is complete, add methanol (8  $\mu$ L, 0.2 mmol) and stir at room temperature for 1 h. Solvent was removed under reduced pressure, and the residue was purified via column chromatography on silica gel with hexane/EtOAc =10:1 as eluent to afford the products **4** as a Colourless liquid (37 mg, 74% yield).

##### N-O bond cleavage of **4**<sup>8</sup>: (*unsuccessful*)

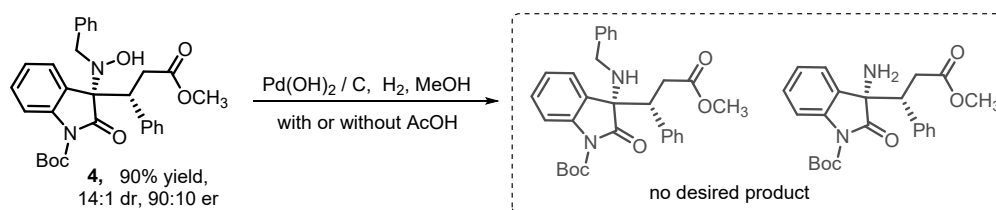

To a flame dried 10 mL round bottom flask equipped with magnetic stirring bar was added **4** (51.6 mg, 0.1 mmol). The solid was diluted with MeOH (1 mL, 0.1 M). The flask was purged with nitrogen gas. Pd(OH)<sub>2</sub>/C (10 mol %) was then added and the flask was purged with nitrogen for a second time. The flask was purged with hydrogen using a balloon and the reaction was then stirred under the hydrogen atmosphere for 24 hours. *TLC monitoring revealed that in the absence of acetic acid, the reaction scarcely proceeded, with most of the starting material remaining unreacted. Upon the addition of acetic acid (0.06mL, 1 mmol), however, the reaction mixture became highly complex; the starting material was consumed, but the desired product was not observed.*

### V: Stereochemistry determination via X-ray crystallographic analysis:

Method for single crystals cultivation: a solid sample (10–20 mg) was dissolved in ethyl acetate (50–100  $\mu\text{L}$ ) in a vial at room temperature, and petroleum ether (2–8 mL) was added into the above solution slowly while keeping the sample all dissolved. Then the vial was sealed with a piece of parafilm and stayed quietly for several days to allow the slow evaporation of the solvents until a single crystal was obtained. CCDC 2471507 contains the supplementary crystallographic data for this paper. These data can be obtained free of charge from The Cambridge Crystallographic Data Centre via [www.ccdc.cam.ac.uk/data\\_request/cif](http://www.ccdc.cam.ac.uk/data_request/cif).

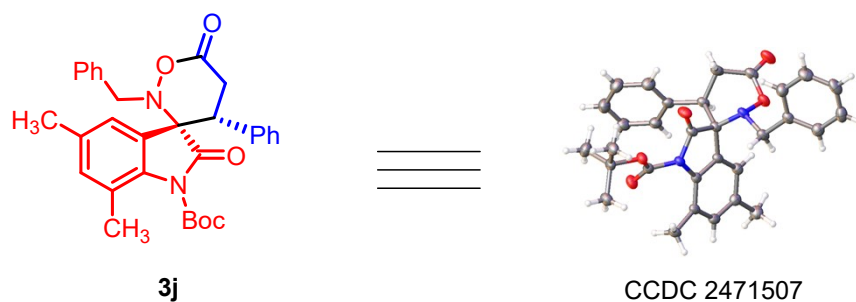

**Table 1 Crystal data and structure refinement for 3j.**

|                                               |                                                               |
|-----------------------------------------------|---------------------------------------------------------------|
| Identification code                           | 86_8                                                          |
| Empirical formula                             | $\text{C}_{31}\text{H}_{32}\text{N}_2\text{O}_5$              |
| Formula weight                                | 512.58                                                        |
| Temperature/K                                 | 273.15                                                        |
| Crystal system                                | monoclinic                                                    |
| Space group                                   | $P2_1/n$                                                      |
| $a/\text{\AA}$                                | 8.2948(3)                                                     |
| $b/\text{\AA}$                                | 13.5305(5)                                                    |
| $c/\text{\AA}$                                | 24.0231(9)                                                    |
| $\alpha /^\circ$                              | 90                                                            |
| $\beta /^\circ$                               | 93.712(2)                                                     |
| $\gamma /^\circ$                              | 90                                                            |
| Volume/ $\text{\AA}^3$                        | 2690.52(17)                                                   |
| Z                                             | 4                                                             |
| $\rho_{\text{calc}}/\text{g cm}^{-3}$         | 1.265                                                         |
| $\mu / \text{mm}^{-1}$                        | 0.695                                                         |
| F(000)                                        | 1088.0                                                        |
| Crystal size/ $\text{mm}^3$                   | $0.15 \times 0.13 \times 0.1$                                 |
| Radiation                                     | $\text{CuK}\alpha$ ( $\lambda = 1.54178$ )                    |
| $2\theta$ range for data collection/ $^\circ$ | 7.374 to 136.53                                               |
| Index ranges                                  | $-9 \leq h \leq 9, -16 \leq k \leq 16, -28 \leq l \leq 28$    |
| Reflections collected                         | 53611                                                         |
| Independent reflections                       | 4890 [ $R_{\text{int}} = 0.0416, R_{\text{sigma}} = 0.0208$ ] |
| Data/restraints/parameters                    | 4890/0/349                                                    |
| Goodness-of-fit on $F^2$                      | 1.070                                                         |

Final R indexes [ $I \geq 2 \sigma(I)$ ]  $R_1 = 0.0387$ ,  $wR_2 = 0.0991$   
Final R indexes [all data]  $R_1 = 0.0407$ ,  $wR_2 = 0.1003$   
Largest diff. peak/hole /  $e \text{ \AA}^{-3}$  0.29/-0.19

References cited in the SI:

- [1] Guo C, Saifuddin M, Saravanan T, et al. *ACS catalysis*, **2019**, 9(5): 4369-4373.
- [2] Ohmatsu K, Ando Y, Nakashima T, et al. *Chemistry*, **2016**, 1(5): 802-810.
- [3] Aschwanden P, Frantz D E, Carreira E M. *Organic letters*, **2000**, 2(15): 2331-2333.
- [4] Sun H B, Gong L, Tian Y B, et al. *Angewandte Chemie International Edition*, **2018**, 130(30): 9700-9700.
- [5] Chen Y R, Zhan G, Du W, et al. *Advanced Synthesis & Catalysis*, **2016**, 358(23): 3759-3764.
- [6] Zhan G, Shi M L, Lin W J, et al. *Chemistry—A European Journal*, **2017**, 23(26): 6286-6289.
- [7] Cheng X, Fei W, Luo Z, et al. *Synthesis*, **2020**, 52(23): 3632-3639.
- [8] Phillips E M, Reynolds T E, Scheidt K A, *Journal of the American Chemical Society*, **2008**, 130(8), 2416–2417.

## VI. Characterization of Products:

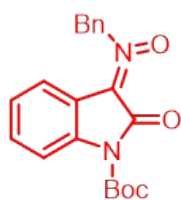

**(Z)-N-benzyl-1-(tert-butoxycarbonyl)-2-oxoindolin-3-imine oxide (1a):** Yield: 1.2 g (84%), yellow powder;  $^1\text{H NMR}$  (400 MHz, Chloroform-*d*)  $\delta$  8.48 (dd,  $J = 7.8, 1.4$  Hz, 1H), 7.89 (d,  $J = 8.2$  Hz, 1H), 7.45 (td,  $J = 7.9, 1.4$  Hz, 1H), 7.23 (td,  $J = 7.6, 1.0$  Hz, 3H), 4.40 (s, 3H), 1.67 (s, 9H).

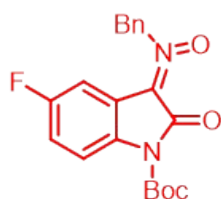

**(Z)-N-benzyl-1-(tert-butoxycarbonyl)-5-fluoro-2-oxoindolin-3-imine oxide (1b):** Yield: 820 mg (73%), yellow powder;  $^1\text{H NMR}$  (400 MHz, Chloroform-*d*)  $\delta$  8.22 (dd,  $J = 8.5, 2.8$  Hz, 1H), 7.81 (dd,  $J = 9.0, 4.4$  Hz, 1H), 7.65 – 7.55 (m, 2H), 7.42 – 7.32 (m, 3H), 7.12 (td,  $J = 8.8, 2.9$  Hz, 1H), 5.94 (s, 2H), 1.68 (s, 9H).  $^{19}\text{F NMR}$  (377 MHz, Chloroform-*d*)  $\delta$  -116.94 (dt,  $J = 8.3, 4.2$  Hz).

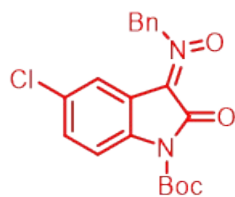

**(Z)-N-benzyl-1-(tert-butoxycarbonyl)-5-chloro-2-oxoindolin-3-imine oxide (1c):** Yield: 850 mg (76%), yellow powder;  $^1\text{H NMR}$  (400 MHz, Chloroform-*d*)  $\delta$  8.50 (d,  $J = 2.2$  Hz, 1H), 7.78 (dd,  $J = 8.8, 1.9$  Hz, 1H), 7.63 – 7.56 (m, 2H), 7.42 – 7.33 (m, 4H), 5.93 (s, 2H), 1.67 (s, 9H).

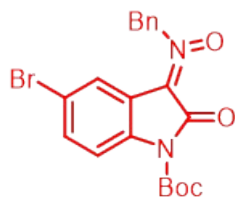

**(Z)-N-benzyl-5-bromo-1-(tert-butoxycarbonyl)-2-oxoindolin-3-imine oxide (1d):** Yield: 954 mg (74%), yellow powder;  $^1\text{H NMR}$  (400 MHz, Chloroform-*d*)  $\delta$  8.65 (d,  $J = 2.1$  Hz, 1H), 7.73 (dd,  $J = 8.6, 2.1$  Hz, 1H), 7.59 (h,  $J = 3.7, 3.3$  Hz, 2H), 7.53 (dt,  $J = 8.7, 2.0$  Hz, 1H), 7.37 (dq,  $J = 6.2, 3.7, 2.9$  Hz, 3H), 5.93 (d,  $J = 2.3$  Hz, 2H), 1.67 (d,  $J = 2.6$  Hz, 9H).

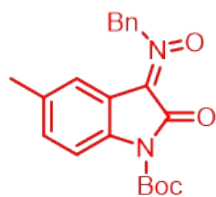

**(Z)-N-benzyl-1-(tert-butoxycarbonyl)-5-methyl-2-oxoindolin-3-imine oxide (1e):** Yield: 784 mg (72%), yellow powder;  $^1\text{H NMR}$  (400 MHz, Chloroform-*d*)  $\delta$  8.52 – 8.13 (m, 1H), 7.69 (d,  $J = 8.3$  Hz, 1H), 7.65 – 7.54 (m, 2H), 7.41 – 7.31 (m, 3H), 7.23 (ddd,  $J = 8.3, 2.0, 0.9$  Hz, 1H), 5.93 (s, 2H), 2.34 (s, 3H), 1.67 (s, 9H).

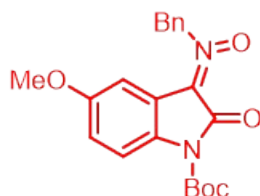

**(Z)-N-benzyl-1-(tert-butoxycarbonyl)-5-methoxy-2-oxoindolin-3-imine oxide (1f):** Yield: 840 mg (70%), yellow powder;  $^1\text{H NMR}$  (400 MHz, Chloroform-*d*)  $\delta$  8.11 (d,  $J = 2.8$  Hz, 1H), 7.73 (d,  $J = 8.9$  Hz, 1H), 7.64 – 7.56 (m, 2H), 7.42 – 7.31 (m, 3H), 6.97 (dd,  $J = 8.9, 2.9$  Hz, 1H), 5.94 (s, 2H), 3.81 (s, 3H), 1.67 (s, 9H).

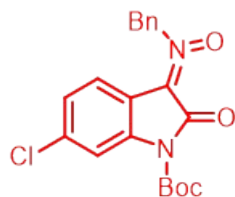

**(Z)-N-benzyl-1-(tert-butoxycarbonyl)-6-chloro-2-oxoindolin-3-imine oxide (1g):** Yield: 875 mg (76%), yellow powder;  $^1\text{H NMR}$  (400 MHz, Chloroform-*d*)  $\delta$  8.42 (d,  $J = 8.4$  Hz, 1H), 7.90 (d,  $J = 1.9$  Hz, 1H), 7.64 – 7.55 (m, 2H), 7.42 – 7.32 (m, 3H), 7.18 (dd,  $J = 8.3, 1.9$  Hz, 1H), 5.91 (s, 2H), 1.68 (s, 9H).

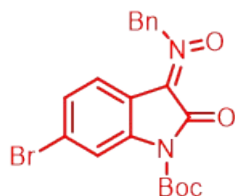

**(Z)-N-benzyl-6-bromo-1-(tert-butoxycarbonyl)-2-oxoindolin-3-imine oxide (1h):** Yield: 961 mg (75%), yellow powder;  $^1\text{H NMR}$  (400 MHz, Chloroform-*d*)  $\delta$  8.34 (d,  $J = 8.3$  Hz, 1H), 8.07 (d,  $J = 1.8$  Hz, 1H), 7.62 – 7.54 (m, 2H), 7.42 – 7.31 (m, 4H), 5.90 (s, 2H), 1.68 (s, 9H).

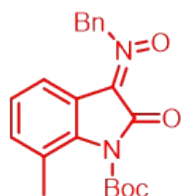

**(Z)-N-benzyl-1-(tert-butoxycarbonyl)-7-methyl-2-oxoindolin-3-imine oxide (1i):** Yield: 828 mg (76%), yellow powder; <sup>1</sup>H NMR (400 MHz, Chloroform-*d*) δ 8.34 (d, *J* = 1.9 Hz, 1H), 7.69 (d, *J* = 8.3 Hz, 1H), 7.60 (dd, *J* = 6.8, 2.8 Hz, 2H), 7.36 (dd, *J* = 5.1, 2.0 Hz, 3H), 7.26 – 7.19 (m, 5H), 5.93 (s, 2H), 2.35 (s, 3H), 1.67 (s, 9H).

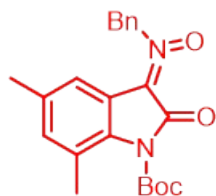

**(Z)-N-benzyl-1-(tert-butoxycarbonyl)-5,7-dimethyl-2-oxoindolin-3-imineoxide (1j):** Yield: 791 mg (70%), yellow powder; <sup>1</sup>H NMR (400 MHz, Chloroform-*d*) δ 8.20 – 8.15 (m, 1H), 7.62 – 7.54 (m, 2H), 7.41 7.30 (m, 3H), 7.04 (dt, *J* = 1.7, 0.8 Hz, 1H), 5.91 (s, 2H), 2.30 (s, 3H), 2.21 (s, 3H), 1.66 (s, 9H).

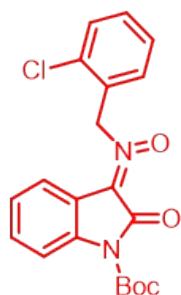

**(Z)-1-(tert-butoxycarbonyl)-N-(2-chlorobenzyl)-2-oxoindolin-3-imine oxide (1k):** Yield: 840 mg (73%), yellow powder; <sup>1</sup>H NMR (400 MHz, Chloroform-*d*) δ 8.52 (dd, *J* = 7.8, 1.5 Hz, 1H), 7.89 (d, *J* = 8.3 Hz, 1H), 7.51 – 7.18 (m, 7H), 6.12 (s, 2H), 1.68 (s, 9H).

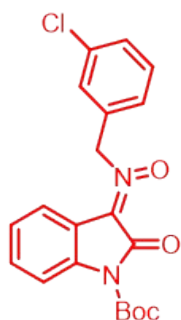

**(Z)-N-(4-bromobenzyl)-1-(tert-butoxycarbonyl)-2-oxoindolin-3-imine oxide (1l):** Yield: 898 mg (78%), yellow powder; <sup>1</sup>H NMR (400 MHz, Chloroform-*d*) δ 8.49 (dd, *J* = 7.8, 1.4 Hz, 1H), 7.84 (d, *J* = 8.2 Hz, 1H), 7.60 (d, *J* = 2.0 Hz, 1H), 7.50 (dt, *J* = 7.1, 1.8 Hz, 1H), 7.44 (td, *J* = 8.0, 1.4 Hz, 1H), 7.37 – 7.26 (m, 4H), 7.21 (t, *J* = 7.7 Hz, 1H), 5.91 (s, 2H), 1.68 (s, 9H).

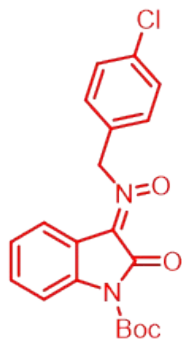

**(Z)-1-(tert-butoxycarbonyl)-N-(4-chlorobenzyl)-2-oxoindolin-3-imine oxide (1m):** Yield: 991 mg (80%), yellow powder;  $^1\text{H NMR}$  (400 MHz, Chloroform-*d*)  $\delta$  8.48 (dd,  $J = 7.8, 1.4$  Hz, 1H), 7.82 (d,  $J = 8.2$  Hz, 1H), 7.60 – 7.52 (m, 2H), 7.42 (td,  $J = 8.0, 1.4$  Hz, 1H), 7.19 (td,  $J = 7.7, 1.0$  Hz, 1H), 6.92 – 6.84 (m, 2H), 5.87 (s, 2H), 3.79 (s, 3H), 1.68 (s, 9H).

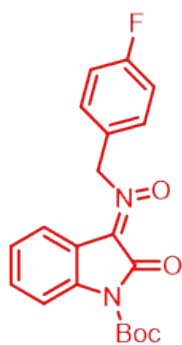

**(Z)-1-(tert-butoxycarbonyl)-N-(3-chlorobenzyl)-2-oxoindolin-3-imine oxide (1n):** Yield: 890 mg (75%), yellow powder;  $^1\text{H NMR}$  (400 MHz, Chloroform-*d*)  $\delta$  8.48 (dd,  $J = 7.8, 1.4$  Hz, 1H), 7.82 (d,  $J = 8.2$  Hz, 1H), 7.67 – 7.58 (m, 2H), 7.43 (td,  $J = 7.9, 1.4$  Hz, 1H), 7.20 (td,  $J = 7.7, 1.0$  Hz, 1H), 7.09 – 7.00 (m, 2H), 5.89 (s, 2H), 1.68 (s, 9H);  $^{19}\text{F NMR}$  (377 MHz, Chloroform-*d*)  $\delta$  -112.43.

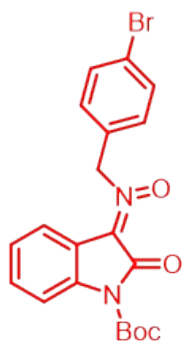

**(Z)-1-(tert-butoxycarbonyl)-N-(4-fluorobenzyl)-2-oxoindolin-3-imine oxide (1o):** Yield: 1.0 g (79%), yellow powder;  $^1\text{H NMR}$  (400 MHz, Chloroform-*d*)  $\delta$  8.47 (dd,  $J = 7.8, 1.4$  Hz, 1H), 7.82 (d,  $J = 8.2$  Hz, 1H), 7.50 (s, 4H), 7.44 (td,  $J = 7.9, 1.5$  Hz, 1H), 7.21 (td,  $J = 7.7, 1.0$  Hz, 1H), 5.88 (s, 2H), 1.68 (s, 9H).

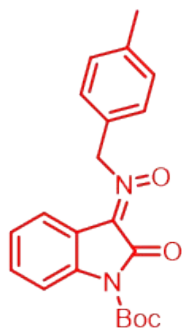

**(Z)-1-(tert-butoxycarbonyl)-N-(4-methylbenzyl)-2-oxoindolin-3-imine oxide (1p):** Yield: 907 mg (87%), yellow powder;  $^1\text{H NMR}$  (400 MHz, Chloroform-*d*)  $\delta$  8.48 (dd,  $J = 7.8, 1.4$  Hz, 1H), 7.85 – 7.78 (m, 1H), 7.53 – 7.46 (m, 2H), 7.42 (td,  $J = 7.9, 1.4$  Hz, 1H), 7.23 – 7.14 (m, 3H), 5.90 (s, 2H), 2.33 (s, 3H), 1.68 (s, 9H).

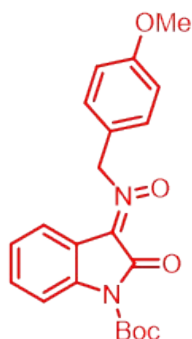

**(Z)-1-(tert-butoxycarbonyl)-N-(4-methoxybenzyl)-2-oxoindolin-3-imine oxide (1q):** Yield: 956 mg (83%), yellow powder;  $^1\text{H NMR}$  (400 MHz, Chloroform-*d*)  $\delta$  8.48 (dd,  $J = 7.8, 1.4$  Hz, 1H), 7.82 (d,  $J = 8.2$  Hz, 1H), 7.60 – 7.52 (m, 2H), 7.42 (td,  $J = 8.0, 1.4$  Hz, 1H), 7.19 (td,  $J = 7.7, 1.0$  Hz, 1H), 6.92 – 6.84 (m, 2H), 5.87 (s, 2H), 3.79 (s, 3H), 1.68 (s, 9H).

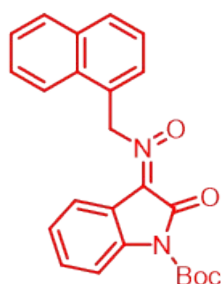

**(Z)-1-(tert-butoxycarbonyl)-N-(naphthalen-1-ylmethyl)-2-oxoindolin-3-imine oxide (1r):** Yield: 1.0 g (80%), yellow powder;  $^1\text{H NMR}$  (400 MHz, Chloroform-*d*)  $\delta$  8.49 (dd,  $J = 7.9, 1.4$  Hz, 1H), 8.22 (d,  $J = 8.5$  Hz, 1H), 7.87 (dd,  $J = 8.2, 5.0$  Hz, 3H), 7.66 (d,  $J = 7.0$  Hz, 1H), 7.63 – 7.39 (m, 4H), 7.19 (t,  $J = 7.7$  Hz, 1H), 6.47 (s, 2H).

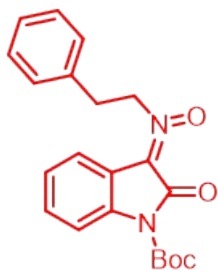

**(Z)-1-(tert-butoxycarbonyl)-2-oxo-N-phenethylindolin-3-imine oxide (1s):** Yield: 1.0 g (84%), yellow powder;  $^1\text{H NMR}$  (400 MHz, Chloroform-*d*)  $\delta$  8.52 (dd,  $J = 7.8, 1.4$  Hz, 1H), 7.83 (d,  $J = 8.2$  Hz, 1H), 7.44 (td,  $J = 7.9, 1.5$  Hz, 1H), 7.38 – 7.31 (m, 3H), 7.31 – 7.27 (m, 2H), 7.23 (td,  $J = 7.8, 1.1$  Hz, 3H), 5.02 – 4.94 (m, 2H), 3.30 – 3.22 (m, 2H), 1.68 (s, 9H).

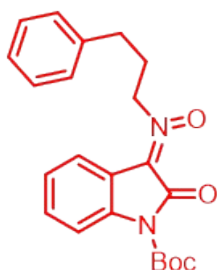

**(Z)-1-(tert-butoxycarbonyl)-N-(4-chlorobenzyl)-2-oxoindolin-3-imine oxide (1t):** Yield: 1.1 g (83%), yellow powder;  $^1\text{H NMR}$  (400 MHz, Chloroform-*d*)  $\delta$  8.51 (dd,  $J = 7.8, 1.4$  Hz, 1H), 7.86 (d,  $J = 8.2$  Hz, 1H), 7.44 (td,  $J = 7.9, 1.6$  Hz, 1H), 7.32 – 7.12 (m, 7H), 4.82 (t,  $J = 7.3$  Hz, 2H), 2.77 (dd,  $J = 9.1, 6.6$  Hz, 2H), 2.30 (dq,  $J = 9.7, 7.4$  Hz, 2H), 1.68 (s, 9H).

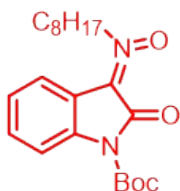

**(Z)-1-(tert-butoxycarbonyl)-N-octyl-2-oxoindolin-3-imine oxide (1u):** Yield: 1.1 g (86%), yellow liquid;  $^1\text{H NMR}$  (400 MHz, Chloroform-*d*)  $\delta$  8.51 (dd,  $J = 7.8, 1.4$  Hz, 1H), 7.85 (dt,  $J = 8.2, 0.8$  Hz, 1H), 7.42 (td,  $J = 7.9, 1.5$  Hz, 1H), 7.21 (td,  $J = 7.7, 1.0$  Hz, 1H), 4.80 – 4.72 (m, 2H), 1.96 (p,  $J = 7.5$  Hz, 2H), 1.68 (s, 9H), 1.46 – 1.39 (m, 2H), 1.37 – 1.23 (m, 8H), 0.91 – 0.83 (m, 3H);  $^{13}\text{C NMR}$  (101 MHz, Chloroform-*d*)  $\delta$  158.97, 148.83, 136.92, 132.67, 131.64, 124.77, 124.21, 118.71, 114.34, 84.94, 64.02, 31.74, 29.13, 29.07, 28.56, 28.12, 26.56, 22.60, 14.07.

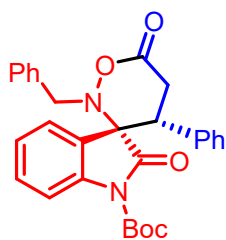

**tert-butyl(3R,4'R)-2'-benzyl-2,6'-dioxo-4'-(m-tolyl)spiro[indoline-3,3'-[1,2]oxazinane]-1-carboxylate (3a):** Yield: 33 mg (70%), white powder;  $^1\text{H NMR}$  (400 MHz, Chloroform-*d*)  $\delta$  7.77 – 7.70 (m, 1H), 7.67 (dd,  $J = 7.5, 1.5$  Hz, 1H), 7.43 (td,  $J = 7.9, 1.5$  Hz, 1H), 7.36 (td,  $J = 7.5, 1.1$  Hz, 1H), 7.31 – 7.11 (m, 9H), 6.80 (dt,  $J = 6.7, 1.6$  Hz, 2H), 4.04 – 3.90 (m, 2H), 3.71 (dd,  $J = 13.5, 3.4$  Hz, 1H), 3.60 (d,  $J = 14.2$  Hz, 1H), 2.77 (dd,  $J = 14.9, 3.4$  Hz, 1H), 1.42 (s, 9H);  $^{13}\text{C NMR}$  (101 MHz, Chloroform-*d*)  $\delta$  174.10, 170.53, 148.09, 139.69, 134.96, 134.42, 130.48, 129.19, 128.33, 128.26, 128.19, 128.01, 127.93, 125.86, 125.25, 124.21, 115.44, 84.26, 73.17, 57.85, 50.94, 32.53, 27.81; HRMS (ESI, *m/z*): calcd. for  $\text{C}_{29}\text{H}_{28}\text{N}_2\text{O}_5$  [ $\text{M}+\text{Na}$ ] $^+$  507.1890, found 507.1894; HPLC analysis: 90:10 er (Chiralcel IH N-5, 20:80  $^i\text{PrOH}$ /Hexane, 0.5 mL/min),  $t_R$  (minor) = 24.9 min,  $t_R$  (major) = 30.9 min.

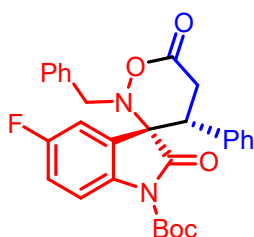

**tert-butyl(3R,4'R)-2'-benzyl-5-fluoro-2,6'-dioxo-4'-phenylspiro[indoline-3,3'-[1,2]oxazinane]-1-carboxylate (3b):** Yield: 25 mg (50%), white powder;  $^1\text{H NMR}$  (400 MHz, Chloroform-*d*)  $\delta$  7.75 (dd,  $J = 9.0, 4.4$  Hz, 1H), 7.40 (dd,  $J = 7.3, 2.8$  Hz, 1H), 7.24 (ddt,  $J = 10.4, 7.4, 3.5$  Hz, 7H), 7.20 – 7.15 (m, 3H), 7.13 (dd,  $J = 8.9, 2.8$  Hz, 1H), 6.82 (dt,  $J = 6.6, 1.6$  Hz, 2H), 3.96 (dd,  $J = 14.5, 2.2$  Hz, 2H), 3.70 – 3.53 (m, 2H), 2.77 (dd,  $J = 15.0, 3.3$  Hz, 1H), 1.41 (s, 9H);  $^{13}\text{C NMR}$  (101 MHz, Chloroform-*d*)  $\delta$  174.03, 170.48, 162.54 (d,  $J = 246.3$  Hz), 148.03, 139.69, 134.27, 131.04 (d,  $J = 8.5$  Hz), 130.53, 130.50, 128.33, 128.22, 127.99, 125.72, 125.24, 124.18, 115.35 (d,  $J = 21.4$  Hz), 115.03, 84.32, 73.08, 57.14, 50.95, 32.49, 27.78;  $^{19}\text{F NMR}$  (377 MHz, Chloroform-*d*)  $\delta$  -115.58 (q,  $J = 7.3, 5.2$  Hz); HRMS (ESI, *m/z*): calcd. for  $\text{C}_{29}\text{H}_{27}\text{FN}_2\text{O}_5$  [ $\text{M}+\text{Na}$ ] $^+$  525.1796, found 525.1802; HPLC analysis: 90:10 er (Chiralcel IH N-5, 20:80  $^i\text{PrOH}$ /Hexane, 0.5 mL/min),  $t_R$  (minor) = 19.3 min,  $t_R$  (major) = 26.5 min.

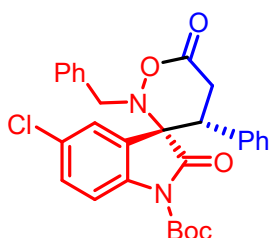

**tert-butyl(3R,4'R)-2'-benzyl-5-chloro-2,6'-dioxo-4'-phenylspiro[indoline-3,3'-[1,2]oxazinane]-1-carboxylate (3c):** Yield: 26.4 mg (51%), white powder;  $^1\text{H NMR}$  (400 MHz, Chloroform-*d*)  $\delta$  7.73 (d,  $J = 8.7$  Hz, 1H), 7.68 (d,  $J = 2.2$  Hz, 1H), 7.43 (dd,  $J = 8.7, 2.2$  Hz, 1H), 7.32 – 7.09 (m, 10H), 6.83 (dt,  $J = 6.7, 1.6$  Hz, 2H), 4.05 – 3.93 (m, 2H), 3.71 – 3.57 (m, 2H), 2.77 (dd,  $J = 14.8, 3.2$  Hz, 1H), 1.41 (s, 9H);  $^{13}\text{C NMR}$  (101 MHz, Chloroform-*d*)  $\delta$  173.88, 169.75, 147.89, 138.19, 134.56, 134.02, 130.75,

130.55, 129.24, 128.44, 128.38, 128.31, 128.08, 127.99, 127.72, 124.32, 116.78, 84.59, 73.29, 57.93, 51.18, 32.50, 27.77; HRMS (ESI, m/z): calcd. for C<sub>29</sub>H<sub>27</sub>ClN<sub>2</sub>O<sub>5</sub> [M+Na]<sup>+</sup> 541.1501, found 541.1506; HPLC analysis: 91:9 er (Chiralcel IH N-5, 20:80 iPrOH/Hexane, 0.5 mL/min), tR (minor) = 30.2 min, tR (major) = 39.0 min.

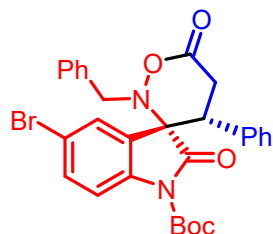

**tert-butyl(3R,4'R)-2'-benzyl-5-bromo-2,6'-dioxo-4'-phenylspiro[indoline-3,3'-[1,2]oxazinane]-1-carboxylate (3d):** Yield: 31.4 mg (56%), white powder; <sup>1</sup>H NMR (400 MHz, Chloroform-*d*) δ 7.81 (d, *J* = 2.1 Hz, 1H), 7.66 (d, *J* = 8.7 Hz, 1H), 7.56 (dd, *J* = 8.7, 2.1 Hz, 1H), 7.30 – 7.19 (m, 8H), 7.18 – 7.08 (m, 2H), 6.81 (dt, *J* = 6.7, 1.6 Hz, 2H), 4.03 – 3.93 (m, 2H), 3.70 – 3.56 (m, 2H), 2.76 (dd, *J* = 14.8, 3.2 Hz, 1H), 1.39 (s, 9H); <sup>13</sup>C NMR (101 MHz, Chloroform-*d*) δ 173.91, 169.63, 147.86, 138.70, 134.53, 134.00, 133.47, 129.24, 128.44, 128.38, 128.30, 128.08, 127.98, 127.14, 118.17, 117.13, 84.61, 73.26, 57.94, 51.21, 32.50, 28.06, 27.76; HRMS (ESI, m/z): calcd. for C<sub>29</sub>H<sub>27</sub>BrN<sub>2</sub>O<sub>5</sub> [M+Na]<sup>+</sup> 585.0996, found 585.0992; HPLC analysis: 88.5:11.5 er (Chiralcel IH N-5, 20:80 iPrOH/Hexane, 0.5 mL/min), tR (minor) = 32.4 min, tR (major) = 41.4 min.

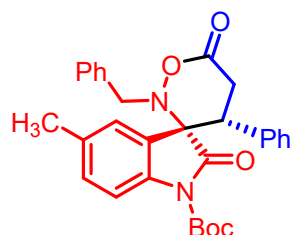

**tert-butyl(3R,4'R)-2'-benzyl-5-methyl-2,6'-dioxo-4'-phenylspiro[indoline-3,3'-[1,2]oxazinane]-1-carboxylate (3e):** Yield: 26.4 mg (53%), white powder; <sup>1</sup>H NMR (400 MHz, Chloroform-*d*) δ 7.63 (d, *J* = 8.3 Hz, 1H), 7.49 (d, *J* = 1.8 Hz, 1H), 7.32 – 7.23 (m, 8H), 7.22 – 7.15 (m, 3H), 6.86 – 6.79 (m, 2H), 3.96 (d, *J* = 14.1 Hz, 2H), 3.70 (dd, *J* = 13.5, 3.2 Hz, 1H), 3.61 (t, *J* = 14.2 Hz, 1H), 2.77 (dd, *J* = 14.7, 3.3 Hz, 1H), 2.50 (s, 3H), 1.42 (s, 9H); <sup>13</sup>C NMR (101 MHz, Chloroform-*d*) δ 174.43, 170.60, 148.16, 137.29, 135.13, 134.54, 131.00, 129.14, 128.31, 128.25, 128.15, 127.98, 127.88, 125.87, 124.62, 115.24, 84.05, 73.42, 57.79, 51.06, 32.62, 27.81, 21.25; HRMS (ESI, m/z): calcd. for C<sub>29</sub>H<sub>28</sub>N<sub>2</sub>O<sub>5</sub> [M+Na]<sup>+</sup> 521.2047, found 521.2056; HPLC analysis: 92.5:7.5 er (Chiralcel IH N-5, 20:80 iPrOH/Hexane, 0.5 mL/min), tR (minor) = 26.7min, tR (major) = 29.0 min.

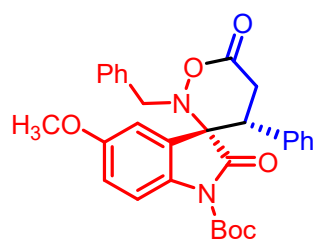

**tert-butyl(3R,4'R)-2'-benzyl-5-methoxy-2,6'-dioxo-4'-phenylspiro[indoline-3,3'-[1,2]oxazinane]-1-**

**carboxylate(3f):** Yield: 33.9 mg (66%), white powder;  $^1\text{H NMR}$  (400 MHz, Chloroform-*d*)  $\delta$  7.69 (d,  $J$  = 8.9 Hz, 1H), 7.34 – 7.19 (m, 9H), 7.17 (d,  $J$  = 6.3 Hz, 1H), 7.12 (dd,  $J$  = 5.0, 1.8 Hz, 1H), 6.96 (dd,  $J$  = 9.0, 2.7 Hz, 1H), 6.87 – 6.81 (m, 2H), 4.02 – 3.90 (m, 5H), 3.75 – 3.57 (m, 3H), 2.78 (dd,  $J$  = 14.9, 3.3 Hz, 1H), 1.42 (s, 9H);  $^{13}\text{C NMR}$  (101 MHz, Chloroform-*d*)  $\delta$  174.19, 170.52, 157.35, 148.18, 135.02, 134.41, 132.96, 129.16, 128.32, 128.26, 128.19, 128.02, 127.92, 127.02, 116.57, 115.47, 109.75, 84.02, 73.48, 57.83, 55.91, 50.95, 32.55, 29.72, 27.82; HRMS (ESI,  $m/z$ ): calcd. for  $\text{C}_{30}\text{H}_{30}\text{N}_2\text{O}_6$   $[\text{M}+\text{Na}]^+$  537.1996, found 537.2000; HPLC analysis: 91:9 er (Chiralcel IH N-5, 20:80  $^i\text{PrOH}$ /Hexane, 0.5 mL/min),  $t_R$  (minor) = 29.5 min,  $t_R$  (major) = 34.6 min.

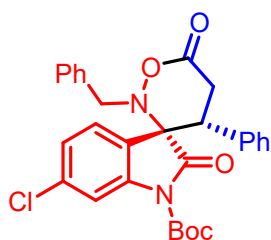

**tert-butyl (3R,4'R)-2'-benzyl-6-chloro-2,6'-dioxo-4'-phenylspiro[indoline-3,3'-[1,2]oxazinane]-1-carboxylate(3g):** Yield: 28.4 mg (55%), white powder;  $^1\text{H NMR}$  (400 MHz, Chloroform-*d*)  $\delta$  7.82 (d,  $J$  = 1.9 Hz, 1H), 7.60 (d,  $J$  = 8.1 Hz, 1H), 7.36 (dd,  $J$  = 8.1, 1.9 Hz, 1H), 7.32 – 7.14 (m, 10H), 6.85 – 6.78 (m, 2H), 4.03 – 3.90 (m, 2H), 3.66 (dd,  $J$  = 13.6, 3.3 Hz, 1H), 3.58 (d,  $J$  = 14.1 Hz, 1H), 2.76 (dd,  $J$  = 14.9, 3.3 Hz, 1H), 1.41 (s, 9H);  $^{13}\text{C NMR}$  (101 MHz, Chloroform-*d*)  $\delta$  173.92, 170.00, 147.82, 140.62, 136.38, 134.58, 134.10, 129.20, 128.47, 128.36, 128.31, 128.06, 127.97, 125.37, 125.12, 124.26, 116.21, 84.76, 73.03, 57.89, 51.03, 32.50, 27.75; HRMS (ESI,  $m/z$ ): calcd. for  $\text{C}_{29}\text{H}_{27}\text{ClN}_2\text{O}_5$   $[\text{M}+\text{Na}]^+$  541.1501, found 541.1513; HPLC analysis: 91:9 er (Chiralcel IH N-5, 20:80  $^i\text{PrOH}$ /Hexane, 0.5 mL/min),  $t_R$  (minor) = 31.2 min,  $t_R$  (major) = 45.0 min.

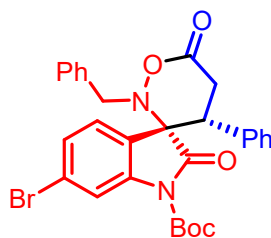

**tert-butyl(3R,4'R)-2'-benzyl-6-bromo-2,6'-dioxo-4'-phenylspiro[indoline-3,3'-[1,2]oxazinane]-1-carboxylate(3h):** Yield: 36.5 mg (65%), white powder;  $^1\text{H NMR}$  (400 MHz, Chloroform-*d*)  $\delta$  7.99 (d,  $J$  = 1.6 Hz, 1H), 7.58 – 7.48 (m, 2H), 7.31 – 7.27 (m, 1H), 7.27 – 7.14 (m, 9H), 6.82 (dt,  $J$  = 6.4, 1.7 Hz, 2H), 4.03 – 3.90 (m, 2H), 3.65 (dd,  $J$  = 13.6, 3.3 Hz, 1H), 3.58 (d,  $J$  = 14.1 Hz, 1H), 2.76 (dd,  $J$  = 14.9, 3.3 Hz, 1H), 1.40 (s, 9H);  $^{13}\text{C NMR}$  (101 MHz, Chloroform-*d*)  $\delta$  173.92, 169.90, 147.82, 140.69, 134.59, 134.09, 129.19, 128.49, 128.38, 128.32, 128.07, 127.97, 125.42, 124.81, 124.35, 118.96, 84.77, 73.10, 57.89, 50.98, 32.50, 27.75; HRMS (ESI,  $m/z$ ): calcd. for  $\text{C}_{29}\text{H}_{27}\text{BrN}_2\text{O}_5$   $[\text{M}+\text{Na}]^+$  585.0996, found 585.1005; HPLC analysis: 92:8 er (Chiralcel IH N-5, 20:80  $^i\text{PrOH}$ /Hexane, 0.5 mL/min),  $t_R$  (minor) = 32.8min,  $t_R$  (major) = 48.8 min.

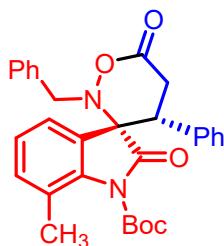

**tert-butyl(3R,4'R)-2'-benzyl-7-methyl-2,6'-dioxo-4'-phenylspiro[indoline-3,3'-[1,2]oxazinane]-1-carboxylate(3i):** Yield: 32.8 mg (66%), white powder;  $^1\text{H NMR}$  (400 MHz, Chloroform-*d*)  $\delta$  7.63 (d,  $J$  = 8.3 Hz, 1H), 7.49 (d,  $J$  = 1.9 Hz, 1H), 7.32 – 7.22 (m, 7H), 7.22 – 7.13 (m, 3H), 6.82 (dd,  $J$  = 7.6, 1.8 Hz, 2H), 4.06 – 3.92 (m, 2H), 3.70 (dd,  $J$  = 13.6, 3.2 Hz, 1H), 3.60 (d,  $J$  = 14.3 Hz, 1H), 2.77 (dd,  $J$  = 14.7, 3.2 Hz, 1H), 2.50 (s, 3H), 1.42 (s, 9H);  $^{13}\text{C NMR}$  (101 MHz, Chloroform-*d*)  $\delta$  174.37, 170.58, 148.16, 137.31, 135.11, 134.56, 130.99, 129.14, 128.30, 128.24, 128.13, 127.99, 127.87, 125.89, 124.62, 115.23, 84.03, 73.41, 57.80, 51.07, 32.62, 27.81, 21.24; HRMS (ESI,  $m/z$ ): calcd. for  $\text{C}_{30}\text{H}_{30}\text{N}_2\text{O}_5$   $[\text{M}+\text{Na}]^+$  521.2047, found 521.2056; HPLC analysis: 87:13 er (Chiralcel IH N-5, 20:80  $^i\text{PrOH}$ /Hexane, 0.5 mL/min),  $t_R$  (minor) = 25.4 min,  $t_R$  (major) = 27.6 min.

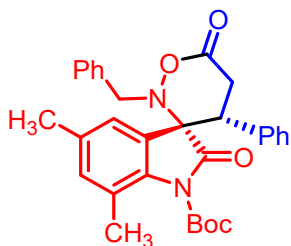

**tert-butyl(3R,4'R)-2'-benzyl-5,7-dimethyl-2,6'-dioxo-4'-phenylspiro[indoline-3,3'-[1,2]oxazinane]-1-carboxylate (3j):** Yield: 20 mg (40%), white powder;  $^1\text{H NMR}$  (400 MHz, Chloroform-*d*)  $\delta$  7.33 – 7.20 (m, 7H), 7.18 (dd,  $J$  = 5.1, 2.0 Hz, 3H), 7.04 (d,  $J$  = 1.7 Hz, 1H), 6.92 – 6.84 (m, 2H), 3.96 (dd,  $J$  = 14.6, 13.4 Hz, 1H), 3.85 – 3.73 (m, 2H), 3.53 (d,  $J$  = 14.4 Hz, 1H), 2.77 (dd,  $J$  = 14.6, 3.3 Hz, 1H), 2.44 (s, 3H), 2.06 (s, 3H), 1.38 (s, 9H);  $^{13}\text{C NMR}$  (101 MHz, Chloroform-*d*)  $\delta$  174.40, 171.47, 147.69, 135.90, 135.35, 135.05, 134.81, 133.92, 129.00, 128.42, 128.25, 128.05, 127.99, 127.78, 127.13, 124.43, 122.18, 84.39, 73.83, 57.51, 50.49, 32.76, 27.62, 21.10, 19.48; HRMS (ESI,  $m/z$ ): calcd. for  $\text{C}_{31}\text{H}_{32}\text{N}_2\text{O}_5$   $[\text{M}+\text{Na}]^+$  521.2047, found 521.2056; HPLC analysis: 91:9 er (Chiralcel IH N-5, 20:80  $^i\text{PrOH}$ /Hexane, 0.5 mL/min),  $t_R$  (minor) = 33.7min,  $t_R$  (major) = 43.9 min.

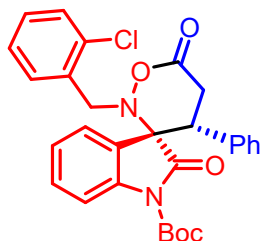

**tert-butyl(3R,4'R)-2'-(4-bromobenzyl)-2,6'-dioxo-4'-phenylspiro[indoline-3,3'-[1,2]oxazinane]-1-carboxylate (3k):** Yield: 26 mg (50%), white powder;  $^1\text{H NMR}$  (400 MHz, Chloroform-*d*)  $\delta$  7.78 – 7.72 (m, 1H), 7.68 (dd,  $J$  = 7.5, 1.4 Hz, 1H), 7.49 (dd,  $J$  = 7.3, 2.1 Hz, 1H), 7.43 (td,  $J$  = 7.9, 1.5 Hz, 1H), 7.35 (td,  $J$  = 7.5, 1.1 Hz, 1H), 7.29 (dd,  $J$  = 7.4, 1.8 Hz, 1H), 7.24 – 7.13 (m, 5H), 6.83 (dt,  $J$  = 6.7, 1.6 Hz,

2H), 4.15 (d,  $J = 15.0$  Hz, 1H), 3.96 (dd,  $J = 15.2, 13.2$  Hz, 1H), 3.75 (dd,  $J = 13.2, 3.6$  Hz, 1H), 3.61 (d,  $J = 15.0$  Hz, 1H), 2.82 (dd,  $J = 15.1, 3.6$  Hz, 1H);  $^{13}\text{C}$  NMR (101 MHz, Chloroform-*d*)  $\delta$  173.70, 170.29, 148.13, 139.67, 134.47, 133.98, 132.94, 131.15, 130.61, 129.37, 129.23, 129.08, 128.38, 128.23, 128.02, 126.80, 125.60, 125.33, 124.33, 115.46, 84.39, 73.14, 54.77, 50.69, 32.51, 27.84; HRMS (ESI,  $m/z$ ): calcd. for  $\text{C}_{29}\text{H}_{27}\text{ClN}_2\text{NaO}_5$   $[\text{M}+\text{Na}]^+$  541.1501, found 541.1511; HPLC analysis: 89:11 er (Chiralcel IB N-5, 20:80  $^i\text{PrOH}$ /Hexane, 0.5 mL/min),  $t_R$  (minor) = 41.7 min,  $t_R$  (major) = 51.8 min.

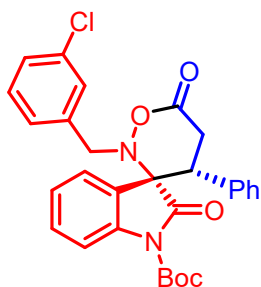

**tert-butyl(3R,4'R)-2'-(3-chlorobenzyl)-2,6'-dioxo-4'-phenylspiro[indoline-3,3'-[1,2]oxazinan]-1-carboxylate (3l):** Yield: 32 mg (62%), white powder;  $^1\text{H}$  NMR (400 MHz, Chloroform-*d*)  $\delta$  7.78 – 7.71 (m, 1H), 7.66 (dd,  $J = 7.4, 1.4$  Hz, 1H), 7.44 (td,  $J = 7.9, 1.5$  Hz, 1H), 7.36 (td,  $J = 7.5, 1.1$  Hz, 1H), 7.25 – 7.05 (m, 7H), 6.81 (dt,  $J = 6.8, 1.6$  Hz, 2H), 3.98 (dd,  $J = 15.0, 13.5$  Hz, 1H), 3.89 (d,  $J = 14.4$  Hz, 1H), 3.71 (dd,  $J = 13.5, 3.4$  Hz, 1H), 3.56 (d,  $J = 14.4$  Hz, 1H), 2.79 (dd,  $J = 15.0, 3.4$  Hz, 1H), 1.43 (s, 8H);  $^{13}\text{C}$  NMR (101 MHz, Chloroform-*d*)  $\delta$  173.83, 170.52, 148.02, 139.65, 137.09, 134.28, 134.14, 130.62, 129.56, 129.10, 128.38, 128.27, 128.16, 127.98, 127.29, 125.61, 125.34, 124.14, 115.53, 84.42, 73.17, 57.24, 50.86, 32.49, 27.80; HRMS (ESI,  $m/z$ ): calcd. for  $\text{C}_{29}\text{H}_{27}\text{ClN}_2\text{NaO}_5$   $[\text{M}+\text{Na}]^+$  541.1501, found 541.1511; HPLC analysis: 90:10 er (Chiralcel IB N-5, 20:80  $^i\text{PrOH}$ /Hexane, 0.5 mL/min),  $t_R$  (minor) = 39.9 min,  $t_R$  (major) = 44.9 min.

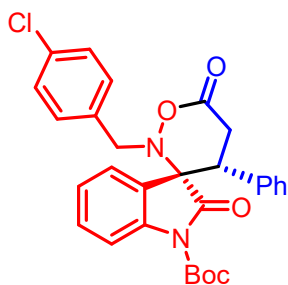

**tert-butyl(3R,4'R)-2'-(4-chlorobenzyl)-2,6'-dioxo-4'-phenylspiro[indoline-3,3'-[1,2]oxazinan]-1-carboxylate (3m):** Yield: 33 mg (65%), white powder;  $^1\text{H}$  NMR (400 MHz, Chloroform-*d*)  $\delta$  7.87 – 7.80 (m, 1H), 7.76 (dd,  $J = 7.4, 1.5$  Hz, 1H), 7.54 (td,  $J = 7.9, 1.5$  Hz, 1H), 7.47 (td,  $J = 7.5, 1.1$  Hz, 1H), 7.38 – 7.19 (m, 8H), 6.89 (dt,  $J = 6.8, 1.6$  Hz, 2H), 4.13 – 3.98 (m, 2H), 3.84 – 3.72 (m, 1H), 3.66 (d,  $J = 14.2$  Hz, 1H), 2.88 (dd,  $J = 15.0, 3.3$  Hz, 1H), 1.52 (s, 9H);  $^{13}\text{C}$  NMR (101 MHz, Chloroform-*d*)  $\delta$  173.95, 170.49, 148.02, 139.66, 134.24, 133.83, 133.40, 130.62, 130.59, 128.45, 128.36, 128.25, 127.97, 125.65, 125.30, 124.17, 115.48, 84.39, 73.15, 57.16, 50.93, 32.47, 27.80; HRMS (ESI,  $m/z$ ): calcd. for  $\text{C}_{29}\text{H}_{27}\text{ClN}_2\text{O}_5$   $[\text{M}+\text{Na}]^+$  541.1501, found 541.1510; HPLC analysis: 90:10 er (Chiralcel IH N-5, 20:80  $^i\text{PrOH}$ /Hexane, 0.5 mL/min),  $t_R$  (minor) = 31.2 min,  $t_R$  (major) = 39.3 min.

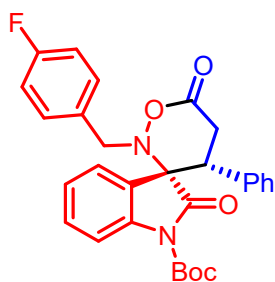

**tert-butyl(3R,4'R)-2,6'-dioxo-4'-phenyl-2'-(3-phenylpropyl)spiro[indoline-3,3'-[1,2]oxazinane]-1-carboxylate (3n):** Yield: 36.6 mg (73%), white powder;  $^1\text{H}$  NMR (400 MHz, Chloroform-*d*)  $\delta$  7.76 – 7.69 (m, 1H), 7.69 – 7.62 (m, 1H), 7.44 (td,  $J = 7.9, 1.5$  Hz, 1H), 7.36 (td,  $J = 7.5, 1.1$  Hz, 1H), 7.16 (dtd,  $J = 8.5, 6.5, 5.9, 3.6$  Hz, 5H), 6.98 – 6.88 (m, 2H), 6.85 – 6.75 (m, 2H), 4.04 – 3.90 (m, 2H), 3.69 (dd,  $J = 13.5, 3.3$  Hz, 1H), 3.57 (d,  $J = 14.1$  Hz, 1H), 2.77 (dd,  $J = 14.9, 3.3$  Hz, 1H), 1.41 (s, 9H);  $^{13}\text{C}$  NMR (101 MHz, CDCl<sub>3</sub>)  $\delta$  174.03, 170.48, 162.54 (d,  $J = 246.3$  Hz), 148.03, 139.69, 134.27, 131.04 (d,  $J = 8.5$  Hz), 130.53, 130.50, 128.33, 128.22, 127.99, 125.72, 125.24, 124.18, 115.24, 115.24 (d,  $J = 42.9$  Hz), 84.32, 73.08, 57.14, 50.95, 32.49, 27.78;  $^{19}\text{F}$  NMR (377 MHz, Chloroform-*d*)  $\delta$  -114.28; HRMS (ESI, *m/z*): calcd. for C<sub>29</sub>H<sub>27</sub>FN<sub>2</sub>NaO<sub>5</sub> [M+Na]<sup>+</sup> 525.1796, found 525.1798; HPLC analysis: 90:10 er (Chiralcel IB N-5, 20:80 <sup>i</sup>PrOH/Hexane, 0.5 mL/min), tR (minor) = 32.5 min, tR (major) = 41.7 min.

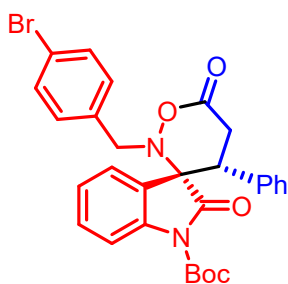

**tert-butyl(3R,4'R)-2'-(2-chlorobenzyl)-2,6'-dioxo-4'-phenylspiro[indoline-3,3'-[1,2]oxazinane]-1-carboxylate (3o):** Yield: 32 mg (58%), white powder;  $^1\text{H}$  NMR (400 MHz, Chloroform-*d*)  $\delta$  7.73 (d,  $J = 8.0$  Hz, 1H), 7.65 (dd,  $J = 7.4, 1.5$  Hz, 1H), 7.44 (td,  $J = 7.9, 1.5$  Hz, 1H), 7.41 – 7.32 (m, 3H), 7.22 – 7.12 (m, 3H), 7.12 – 7.06 (m, 2H), 6.79 (dt,  $J = 6.7, 1.6$  Hz, 2H), 3.97 (dd,  $J = 15.0, 13.5$  Hz, 1H), 3.89 (d,  $J = 14.3$  Hz, 1H), 3.74 – 3.63 (m, 1H), 3.54 (d,  $J = 14.2$  Hz, 1H), 2.77 (dd,  $J = 15.0, 3.3$  Hz, 1H), 1.42 (s, 8H);  $^{13}\text{C}$  NMR (101 MHz, Chloroform-*d*)  $\delta$  173.92, 170.48, 148.02, 139.65, 134.24, 133.95, 131.41, 130.93, 130.59, 128.36, 128.26, 127.97, 125.65, 125.30, 124.17, 122.02, 115.48, 84.40, 73.17, 57.21, 50.93, 32.47, 27.81; HRMS (ESI, *m/z*): calcd. for C<sub>29</sub>H<sub>27</sub>BrN<sub>2</sub>NaO<sub>5</sub> [M+Na]<sup>+</sup> 585.0996, found 585.0998; HPLC analysis: 90:10 er (Chiralcel IB N-5, 20:80 <sup>i</sup>PrOH/Hexane, 0.5 mL/min), tR (minor) = 34.0 min, tR (major) = 42.0 min.

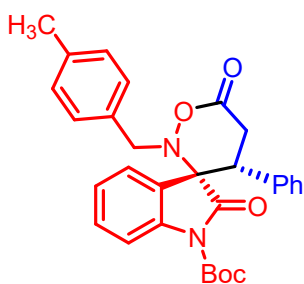

**tert-butyl (3R,4'R)-2'-(4-methylbenzyl)-2,6'-dioxo-4'-phenylspiro[indoline-3,3'-[1,2]oxazinane]-1-**

**carboxylate(3p):** Yield: 21 mg (43%), white powder; <sup>1</sup>H NMR (400 MHz, CDCl<sub>3</sub>) δ 7.75 – 7.69 (m, 1H), 7.66 (dd, *J* = 7.5, 1.4 Hz, 1H), 7.43 (td, *J* = 7.8, 1.5 Hz, 1H), 7.35 (td, *J* = 7.5, 1.2 Hz, 1H), 7.23 – 7.10 (m, 3H), 7.10 – 7.01 (m, 4H), 6.79 (dt, *J* = 6.7, 1.6 Hz, 2H), 4.02 – 3.88 (m, 2H), 3.69 (dd, *J* = 13.5, 3.3 Hz, 1H), 3.57 (d, *J* = 14.0 Hz, 1H), 2.76 (dd, *J* = 14.9, 3.4 Hz, 1H), 2.29 (s, 3H), 1.41 (s, 9H); <sup>13</sup>C NMR (101 MHz, Chloroform-*d*) δ 174.14, 170.45, 148.10, 139.71, 137.60, 134.46, 131.75, 130.40, 129.27, 128.91, 128.29, 128.14, 128.02, 125.92, 125.17, 124.22, 115.39, 84.13, 73.10, 57.65, 50.99, 32.54, 27.80, 21.16; HRMS (ESI, *m/z*): calcd. for C<sub>30</sub>H<sub>30</sub>N<sub>2</sub>O<sub>5</sub> [M+Na]<sup>+</sup> 521.2047, found 521.2047; HPLC analysis: 88:12 er (Chiralcel IH N-5, 20:80 <sup>i</sup>PrOH/Hexane, 0.5 mL/min), tR (minor) = 38.1min, tR (major) = 45.5 min.

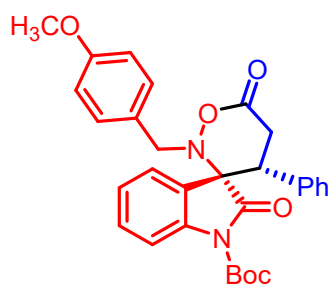

**tert-butyl(3R,4'R)-2'-(4-methoxybenzyl)-2,6'-dioxo-4'-phenylspiro[indoline-3,3'-[1,2]oxazinane]-1-carboxylate(3q):** Yield: 36 mg (70%), white powder; <sup>1</sup>H NMR (400 MHz, CDCl<sub>3</sub>) δ 7.74 – 7.68 (m, 1H), 7.66 (dd, *J* = 7.5, 1.4 Hz, 1H), 7.43 (td, *J* = 7.9, 1.5 Hz, 1H), 7.26 (s, 2H), 7.24 – 7.11 (m, 4H), 7.08 – 7.03 (m, 2H), 6.76 (td, *J* = 8.3, 1.7 Hz, 4H), 3.96 (dd, *J* = 14.3, 3.4 Hz, 2H), 3.75 (s, 3H), 3.72 – 3.63 (m, 1H), 3.58 (d, *J* = 13.7 Hz, 1H), 2.76 (dd, *J* = 14.9, 3.3 Hz, 1H), 1.40 (s, 9H); <sup>13</sup>C NMR (101 MHz, Chloroform-*d*) δ 174.29, 170.40, 159.41, 148.08, 139.74, 134.37, 130.83, 130.39, 128.26, 128.13, 128.05, 126.45, 125.87, 125.12, 124.22, 115.39, 113.58, 84.09, 72.94, 57.41, 55.19, 50.99, 32.51, 27.77; HRMS (ESI, *m/z*): calcd. for C<sub>30</sub>H<sub>30</sub>N<sub>2</sub>O<sub>6</sub> [M+Na]<sup>+</sup> 537.1996, found 537.2000; HPLC analysis: 93.5:6.5 er (Chiralcel IH N-5, 20:80 <sup>i</sup>PrOH/Hexane, 0.5 mL/min), tR (minor) = 31.5 min, tR (major) = 37.2 min.

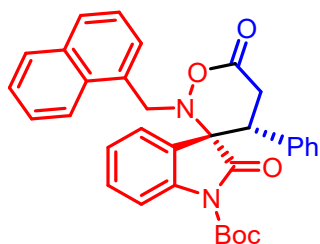

**tert-butyl(3R,4'R)-2'-(naphthalen-1-ylmethyl)-2,6'-dioxo-4'-phenylspiro[indoline-3,3'-[1,2]oxazinane]-1-carboxylate (3r):** Yield: 38 mg (72%), white powder; <sup>1</sup>H NMR (400 MHz, Chloroform-*d*) δ 8.12 (d, *J* = 8.5 Hz, 1H), 7.80 (d, *J* = 8.1 Hz, 1H), 7.75 (dt, *J* = 8.2, 2.0 Hz, 3H), 7.55 (ddd, *J* = 8.5, 6.8, 1.5 Hz, 1H), 7.52 – 7.44 (m, 2H), 7.41 (t, *J* = 7.5 Hz, 1H), 7.32 – 7.23 (m, 2H), 7.22 – 7.09 (m, 4H), 6.81 – 6.64 (m, 2H), 4.46 (d, *J* = 13.6 Hz, 1H), 4.12 (d, *J* = 13.6 Hz, 1H), 4.00 (t, *J* = 14.2 Hz, 1H), 3.70 (dd, *J* = 13.6, 3.1 Hz, 1H), 2.73 (dd, *J* = 14.7, 3.1 Hz, 1H), 1.38 (s, 9H); <sup>13</sup>C NMR (101 MHz, Chloroform-*d*) δ 174.45, 169.94, 148.05, 139.97, 134.31, 133.64, 132.36, 130.54, 129.75, 129.16, 128.80, 128.38, 128.28, 128.15, 128.04, 126.32, 125.80, 125.75, 125.23, 124.94, 124.45, 124.31, 115.49, 84.10, 73.43, 56.19, 51.29, 32.53, 27.76; HRMS (ESI, *m/z*): calcd. for C<sub>33</sub>H<sub>30</sub>N<sub>2</sub>NaO<sub>5</sub> [M+Na]<sup>+</sup> 557.2047, found 557.2047; HPLC analysis: 87.5:12.5 er (Chiralcel IB N-5, 20:80 <sup>i</sup>PrOH/Hexane, 0.5 mL/min), tR (minor) = 18.1 min, tR (major) = 19.2 min.

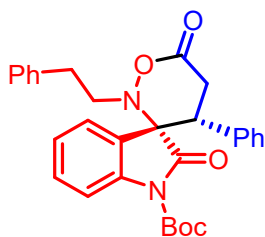

**tert-butyl(3R,4'R)-2,6'-dioxo-2'-phenethyl-4'-phenylspiro[indoline-3,3'-[1,2]oxazinane]-1-carboxylate (3s):** Yield: 34 mg (68%), white powder;  $^1\text{H}$  NMR (400 MHz, Chloroform-*d*)  $\delta$  7.65 (d,  $J$  = 8.2 Hz, 1H), 7.44 (dd,  $J$  = 7.5, 1.4 Hz, 1H), 7.34 (td,  $J$  = 7.9, 1.5 Hz, 1H), 7.25 – 7.20 (m, 3H), 7.18 (dd,  $J$  = 8.4, 2.4 Hz, 2H), 7.14 (d,  $J$  = 2.2 Hz, 1H), 7.12 – 7.08 (m, 2H), 7.02 (ddd,  $J$  = 7.8, 4.3, 2.1 Hz, 1H), 6.79 (ddt,  $J$  = 6.6, 4.2, 1.9 Hz, 2H), 3.90 (dd,  $J$  = 15.3, 13.2 Hz, 1H), 3.67 (dd,  $J$  = 13.2, 3.7 Hz, 1H), 3.05 (tt,  $J$  = 10.4, 5.0 Hz, 1H), 2.97 – 2.92 (m, 2H), 2.82 (dd,  $J$  = 15.2, 3.7 Hz, 1H), 2.68 – 2.58 (m, 1H), 1.43 (s, 9H);  $^{13}\text{C}$  NMR (101 MHz, Chloroform-*d*)  $\delta$  174.00, 170.75, 148.07, 139.46, 138.69, 134.52, 130.30, 128.96, 128.43, 128.35, 128.31, 128.18, 127.96, 126.37, 125.82, 125.21, 124.22, 124.09, 115.35, 84.41, 73.15, 55.52, 50.71, 33.88, 32.50, 27.83; HRMS (ESI,  $m/z$ ): calcd. for  $\text{C}_{30}\text{H}_{30}\text{N}_2\text{NaO}_5$  [ $\text{M}+\text{Na}$ ] $^+$  521.2047, found 521.2043; HPLC analysis: 82:18 er (Chiralcel IB N-5, 20:80  $i$ PrOH/Hexane, 0.5 mL/min),  $t_R$  (minor) = 33.2 min,  $t_R$  (major) = 45.6 min.

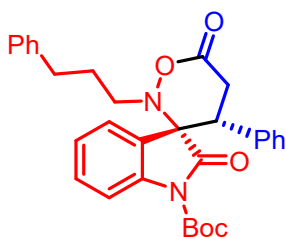

**tert-butyl(3R,4'R)-2,6'-dioxo-4'-phenyl-2'-(3-phenylpropyl)spiro[indoline-3,3'-[1,2]oxazinane]-1-carboxylate (3t):** Yield: 36 mg (70%), white powder;  $^1\text{H}$  NMR (400 MHz, Chloroform-*d*)  $\delta$  7.58 (d,  $J$  = 8.1 Hz, 1H), 7.41 (dd,  $J$  = 7.5, 1.4 Hz, 1H), 7.26 (td,  $J$  = 7.9, 1.4 Hz, 1H), 7.17 (dd,  $J$  = 7.5, 1.1 Hz, 1H), 7.15 – 7.07 (m, 3H), 7.07 – 6.91 (m, 6H), 6.72 – 6.64 (m, 2H), 3.80 (dd,  $J$  = 15.0, 13.4 Hz, 1H), 3.55 (dd,  $J$  = 13.4, 3.5 Hz, 1H), 2.75 – 2.61 (m, 2H), 2.58 – 2.49 (m, 1H), 2.49 – 2.41 (m, 1H), 2.23 (dt,  $J$  = 13.7, 7.1 Hz, 1H), 2.02 – 1.84 (m, 1H), 1.78 (dq,  $J$  = 9.0, 7.0, 5.2 Hz, 1H), 1.32 (s, 9H);  $^{13}\text{C}$  NMR (101 MHz, Chloroform-*d*)  $\delta$  174.35, 170.67, 148.15, 141.67, 139.52, 134.60, 130.28, 128.50, 128.36, 128.31, 128.17, 127.96, 126.04, 125.81, 125.19, 124.21, 115.34, 84.33, 73.40, 53.28, 50.84, 32.77, 32.52, 28.69, 27.86; HRMS (ESI,  $m/z$ ): calcd. for  $\text{C}_{31}\text{H}_{32}\text{N}_2\text{O}_5$  [ $\text{M}+\text{Na}$ ] $^+$  535.2203, found 535.2204; HPLC analysis: 89:11 er (Chiralcel IH N-5, 20:80  $i$ PrOH/Hexane, 0.5 mL/min),  $t_R$  (minor) = 30.1 min,  $t_R$  (major) = 35.0 min.

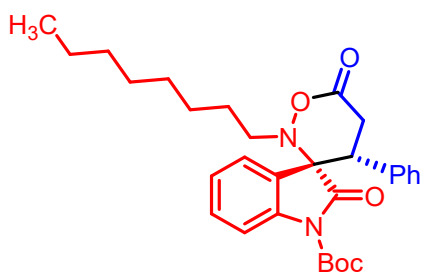

**tert-butyl(3R,4'R)-2'-(4-fluorobenzyl)-2,6'-dioxo-4'-phenylspiro[indoline-3,3'-[1,2]oxazinane]-1-carboxylate (3u):** Yield: 20 mg (50%), white powder; <sup>1</sup>H NMR (400 MHz, Chloroform-*d*) δ 7.71 (d, *J* = 8.1 Hz, 1H), 7.54 (dd, *J* = 7.5, 1.5 Hz, 1H), 7.43 – 6.95 (m, 8H), 6.79 (dt, *J* = 6.5, 1.6 Hz, 2H), 3.90 (dd, *J* = 15.0, 13.4 Hz, 1H), 3.66 (dd, *J* = 13.4, 3.5 Hz, 1H), 2.75 (ddd, *J* = 21.3, 14.1, 5.1 Hz, 2H), 2.30 (dt, *J* = 13.3, 7.6 Hz, 1H), 1.63 (q, *J* = 10.2, 7.8 Hz, 3H), 1.43 (s, 9H), 1.30 – 1.17 (m, 11H), 0.85 (t, *J* = 6.8 Hz, 3H); <sup>13</sup>C NMR (101 MHz, Chloroform-*d*) δ 174.38, 170.75, 148.21, 139.52, 134.67, 130.20, 128.32, 128.12, 127.95, 126.21, 125.14, 124.18, 115.28, 84.29, 73.37, 54.01, 50.86, 32.55, 31.79, 29.26, 29.13, 27.83, 27.15, 26.71, 22.62, 14.09; HRMS (ESI, *m/z*): calcd. for C<sub>30</sub>H<sub>38</sub>N<sub>2</sub>NaO<sub>5</sub> [M+Na]<sup>+</sup> 431.1577, found 431.1582; HPLC analysis: 82.5:17.5er (Chiralcel IB N-5, 20:80 <sup>i</sup>PrOH/Hexane, 0.5 mL/min), tR (minor) = 19.6 min, tR (major) = 26.9 min.

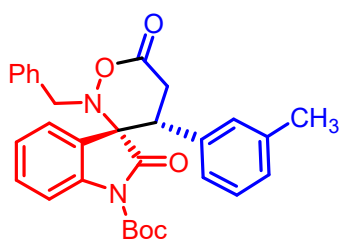

**tert-butyl(3R,4'R)-2'-benzyl-2,6'-dioxo-4'-(*p*-tolyl)spiro[indoline-3,3'-[1,2]oxazinane]-1-carboxylate (3v):** Yield: 26 mg (52%), white powder; <sup>1</sup>H NMR (400 MHz, Chloroform-*d*) δ 7.78 – 7.71 (m, 1H), 7.66 (dd, *J* = 7.5, 1.4 Hz, 1H), 7.39 (dtd, *J* = 29.0, 7.6, 1.3 Hz, 3H), 7.32 – 7.18 (m, 8H), 7.07 – 6.96 (m, 3H), 6.64 (s, 1H), 6.55 (dd, *J* = 5.4, 3.6 Hz, 1H), 4.01 – 3.89 (m, 2H), 3.71 – 3.57 (m, 2H), 2.76 (dd, *J* = 15.0, 3.4 Hz, 1H), 2.20 (s, 3H), 1.42 (s, 9H); <sup>13</sup>C NMR (101 MHz, Chloroform-*d*) δ 174.10, 170.54, 148.16, 139.74, 137.97, 135.01, 134.33, 130.42, 129.20, 128.87, 128.53, 128.26, 128.16, 127.91, 125.97, 125.22, 125.11, 124.19, 115.39, 84.13, 73.17, 57.87, 50.86, 32.49, 27.80, 21.29; HRMS (ESI, *m/z*): calcd. for C<sub>29</sub>H<sub>28</sub>N<sub>2</sub>O<sub>5</sub> [M+Na]<sup>+</sup> 521.2047, found 521.2046; HPLC analysis: 94:6 er (Chiralcel IH N-5, 20:80 <sup>i</sup>PrOH/Hexane, 0.5 mL/min), tR (minor) = 24.1 min, tR (major) = 25.4 min.

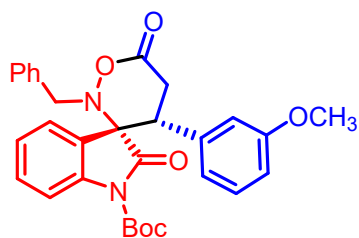

**tert-butyl(3R,4'R)-2'-benzyl-2,6'-dioxo-4'-phenylspiro[indoline-3,3'-[1,2]oxazinane]-1-carboxylate (3w):** Yield: 28 mg (55%), white powder; <sup>1</sup>H NMR (400 MHz, Chloroform-*d*) δ 7.75 (d, *J* = 8.1 Hz, 1H), 7.66 (dd, *J* = 7.3, 1.5 Hz, 1H), 7.43 (td, *J* = 7.9, 1.5 Hz, 1H), 7.36 (td, *J* = 7.5, 1.1 Hz, 1H), 7.32 – 7.17 (m, 6H), 7.06 (t, *J* = 8.0 Hz, 1H), 6.73 (dd, *J* = 8.2, 2.5 Hz, 1H), 6.38 (d, *J* = 7.6 Hz, 1H), 6.32 (t, *J* = 2.2 Hz, 1H), 4.00 – 3.89 (m, 2H), 3.68 (dd, *J* = 13.5, 3.4 Hz, 1H), 3.64 – 3.57 (m, 4H), 2.78 (dd, *J* = 15.0, 3.4 Hz, 1H), 1.43 (s, 9H); <sup>13</sup>C NMR (101 MHz, Chloroform-*d*) δ 173.98, 170.52, 159.36, 148.15, 139.80, 135.87, 134.95, 130.45, 129.31, 129.19, 128.26, 127.93, 125.93, 125.24, 124.19, 120.28, 115.45, 114.42, 112.83, 84.29, 73.09, 57.86, 55.04, 50.94, 32.50, 27.77; HRMS (ESI, *m/z*): calcd. for C<sub>30</sub>H<sub>30</sub>N<sub>2</sub>O<sub>6</sub> [M+Na]<sup>+</sup> 537.1996, found 537.1989; HPLC analysis: 11:89 er (Chiralcel IH N-5, 20:80 <sup>i</sup>PrOH/Hexane, 0.5 mL/min), tR (minor) = 37.3 min, tR (major) = 44.6 min.

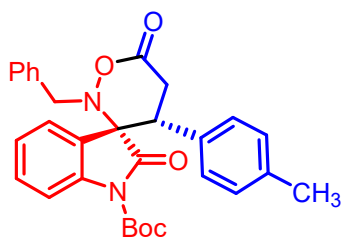

**tert-butyl(3R,4'R)-2'-benzyl-4'-(3-methoxyphenyl)-2,6'-dioxospiro[indoline-3,3'-**

**[1,2]oxazinane]-1-carboxylate(3x):** Yield: 29 mg (60%), white powder; <sup>1</sup>H NMR (400 MHz, Chloroform-*d*) δ 7.78 – 7.71 (m, 1H), 7.66 (dd, *J* = 7.4, 1.4 Hz, 1H), 7.43 (td, *J* = 7.9, 1.5 Hz, 1H), 7.35 (td, *J* = 7.5, 1.1 Hz, 1H), 7.24 (tq, *J* = 5.0, 2.3 Hz, 6H), 6.75 – 6.65 (m, 4H), 4.00 – 3.88 (m, 2H), 3.71 (s, 3H), 3.66 (dd, *J* = 13.3, 3.2 Hz, 1H), 3.59 (d, *J* = 14.2 Hz, 1H), 2.74 (dd, *J* = 14.9, 3.4 Hz, 1H), 1.43 (s, 9H). <sup>13</sup>C NMR (101 MHz, Chloroform-*d*) δ 174.19, 170.70, 159.35, 148.14, 139.66, 135.01, 130.40, 129.17, 129.10, 128.25, 127.90, 126.24, 126.00, 125.23, 124.19, 115.47, 113.66, 84.23, 73.30, 57.89, 55.11, 50.36, 32.76, 27.78. HRMS (ESI, *m/z*): calcd. for C<sub>29</sub>H<sub>28</sub>N<sub>2</sub>O<sub>5</sub> [M+Na]<sup>+</sup> 521.2047, found 521.2057; HPLC analysis: 93:7 er (Chiralcel IH N-5, 20:80 <sup>i</sup>PrOH/Hexane, 0.5 mL/min), tR (minor) = 30.4min, tR (major) = 37.6 min.

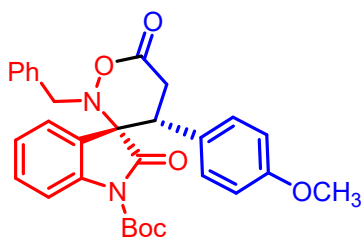

**tert-butyl(3R,4'R)-2'-benzyl-4'-(4-methoxyphenyl)-2,6'-dioxospiro[indoline-3,3'-[1,2]oxazinane]-**

**1-carboxylate (3y):** Yield: 23 mg (45%), white powder; <sup>1</sup>H NMR (400 MHz, Chloroform-*d*) δ 7.74 (d, *J* = 8.1 Hz, 1H), 7.66 (dd, *J* = 7.4, 1.4 Hz, 1H), 7.43 (td, *J* = 7.9, 1.5 Hz, 1H), 7.36 (d, *J* = 7.4 Hz, 1H), 7.24 (dd, *J* = 7.9, 3.5 Hz, 6H), 6.96 (d, *J* = 7.9 Hz, 2H), 6.68 (d, *J* = 7.9 Hz, 2H), 4.01 – 3.93 (m, 1H), 3.92 (d, *J* = 3.1 Hz, 1H), 3.66 (dd, *J* = 13.5, 3.3 Hz, 1H), 3.58 (d, *J* = 14.2 Hz, 1H), 2.74 (dd, *J* = 14.9, 3.3 Hz, 1H), 2.23 (s, 3H), 1.42 (s, 9H); <sup>13</sup>C NMR (101 MHz, Chloroform-*d*) δ 174.24, 170.61, 148.16, 139.68, 137.83, 135.05, 131.34, 130.41, 129.17, 129.02, 128.26, 127.89, 127.86, 125.99, 125.23, 124.20, 115.45, 84.13, 73.30, 57.86, 50.71, 32.64, 27.78, 21.00; HRMS (ESI, *m/z*): calcd. for C<sub>30</sub>H<sub>30</sub>N<sub>2</sub>O<sub>6</sub> [M+Na]<sup>+</sup> 537.1996, found 537.1996; HPLC analysis: 90:10 er (Chiralcel IH N-5, 20:80 <sup>i</sup>PrOH/Hexane, 0.5 mL/min), tR (minor) = 35.2 min, tR (major) = 48.8 min.

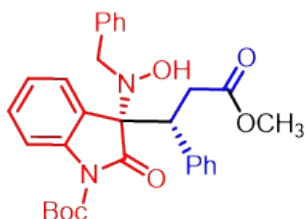

**tert-butyl(R)-3-(benzyl(hydroxy)amino)-3-((R)-3-methoxy-3-oxo-1-phenylpropyl)-2-oxoindoline-**

**1-carboxylate (4):** Yield: 46 mg (90%), white solid; <sup>1</sup>H NMR (400 MHz, Chloroform-*d*) δ 7.97 – 7.90 (m, 1H), 7.44 – 7.40 (m, 1H), 7.28 (d, *J* = 4.3 Hz, 4H), 7.26 – 7.21 (m, 2H), 7.21 – 7.16 (m, 2H), 7.00 (tdd, *J* = 8.6, 7.0, 4.7 Hz, 3H), 6.92 – 6.88 (m, 2H), 6.18 (s, 1H), 4.27 – 4.13 (m, 2H), 3.62 (s, 4H), 3.33

(d,  $J = 12.8$  Hz, 1H), 2.67 (dd,  $J = 15.2, 2.2$  Hz, 1H), 1.58 (s, 9H);  $^{13}\text{C}$  NMR (101 MHz, Chloroform- $d$ )  $\delta$  175.91, 172.81, 148.41, 139.21, 138.05, 137.39, 129.19, 129.11, 129.08, 128.85, 128.05, 127.64, 127.16, 125.80, 124.16, 114.04, 84.31, 75.61, 58.52, 52.24, 47.16, 33.74, 28.10; HRMS (ESI,  $m/z$ ): calcd. for  $\text{C}_{30}\text{H}_{32}\text{N}_2\text{NaO}_6$   $[\text{M}+\text{Na}]^+$  539.2153, found 539.2155; HPLC analysis: 91:9 er (Chiralcel IB N-5, 20:80  $^i\text{PrOH}$ /Hexane, 0.5 mL/min),  $t_R$  (minor) = 9.4 min,  $t_R$  (major) = 24.3 min.

VII:  $^1\text{H}$ ,  $^{13}\text{C}$ ,  $^{19}\text{F}$  and HPLC spectra:

(Z)-N-benzyl-1-(tert-butoxycarbonyl)-2-oxindolin-3-imine oxide (1a)

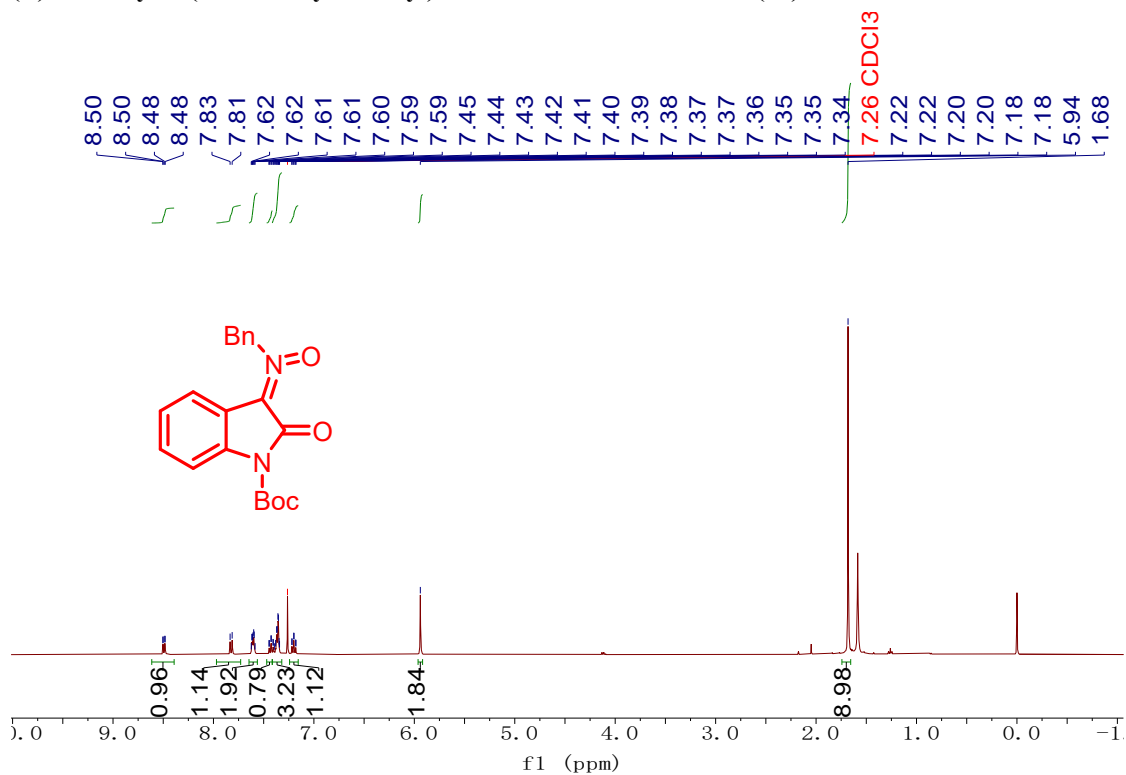

(Z)-N-benzyl-1-(tert-butoxycarbonyl)-5-fluoro-2-oxindolin-3-imine oxide (1b)

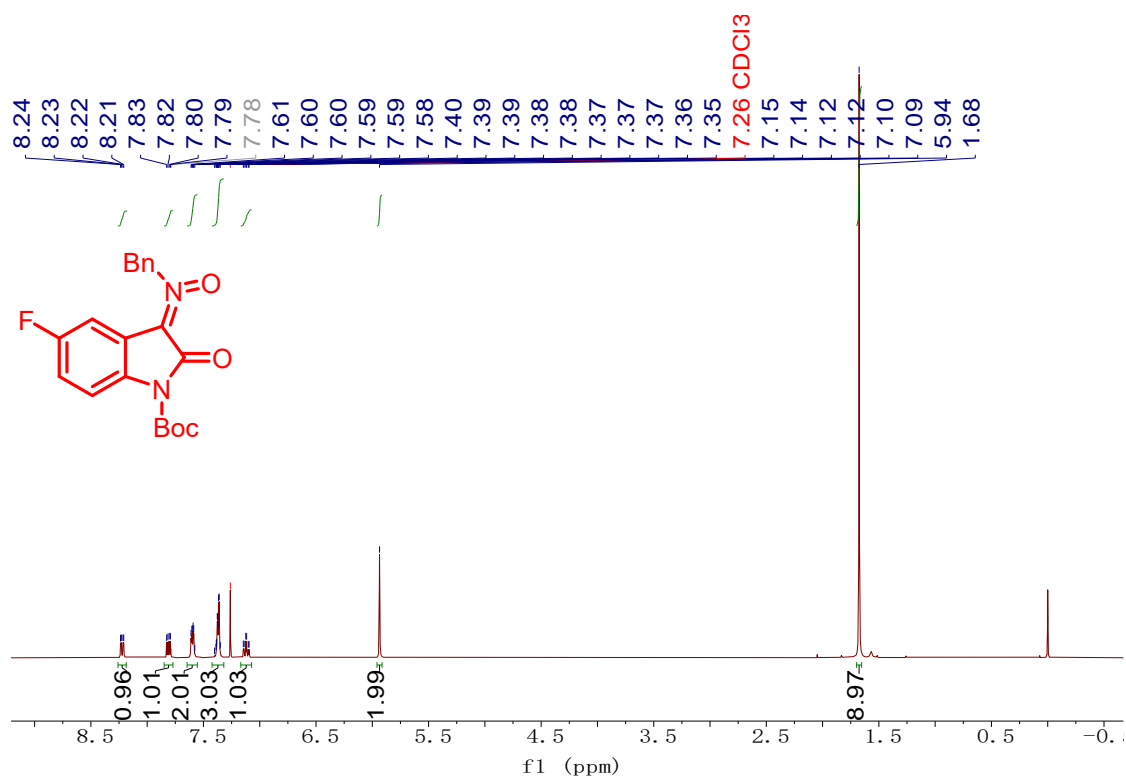

**(Z)-N-benzyl-1-(tert-butoxycarbonyl)-5-chloro-2-oxindolin-3-imine oxide(1c)**

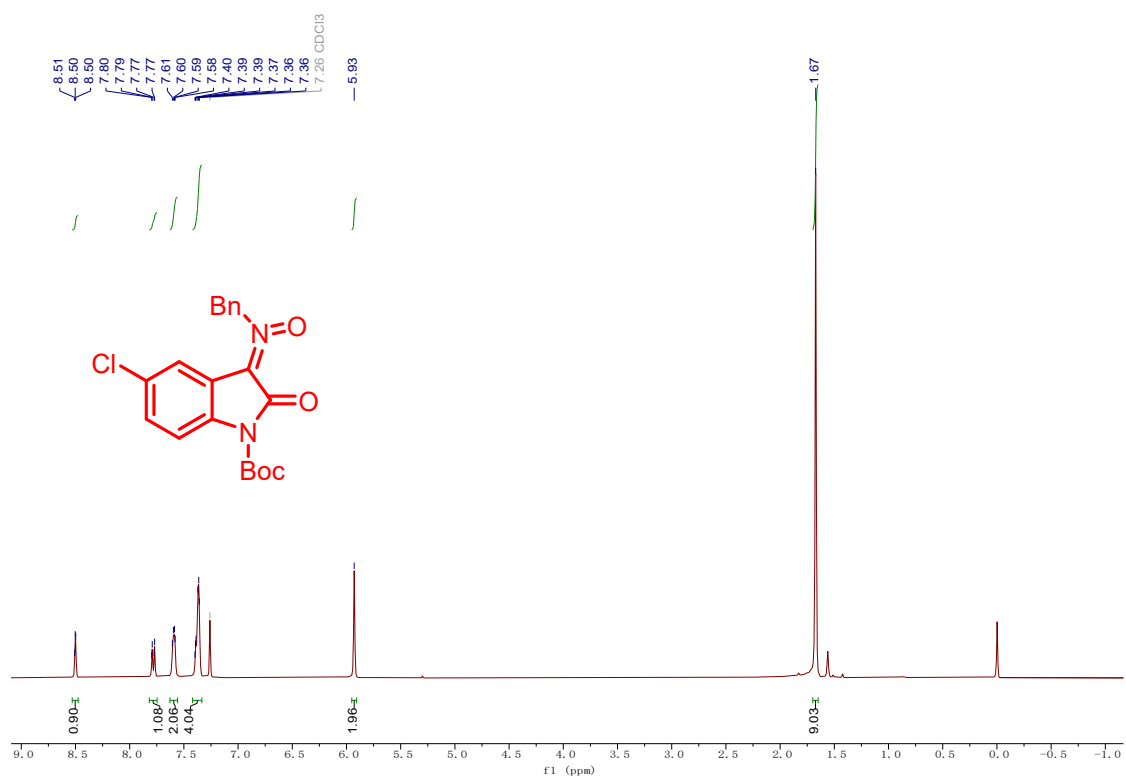

**(Z)-N-benzyl-5-bromo-1-(tert-butoxycarbonyl)-2-oxindolin-3-imine oxide(1d)**

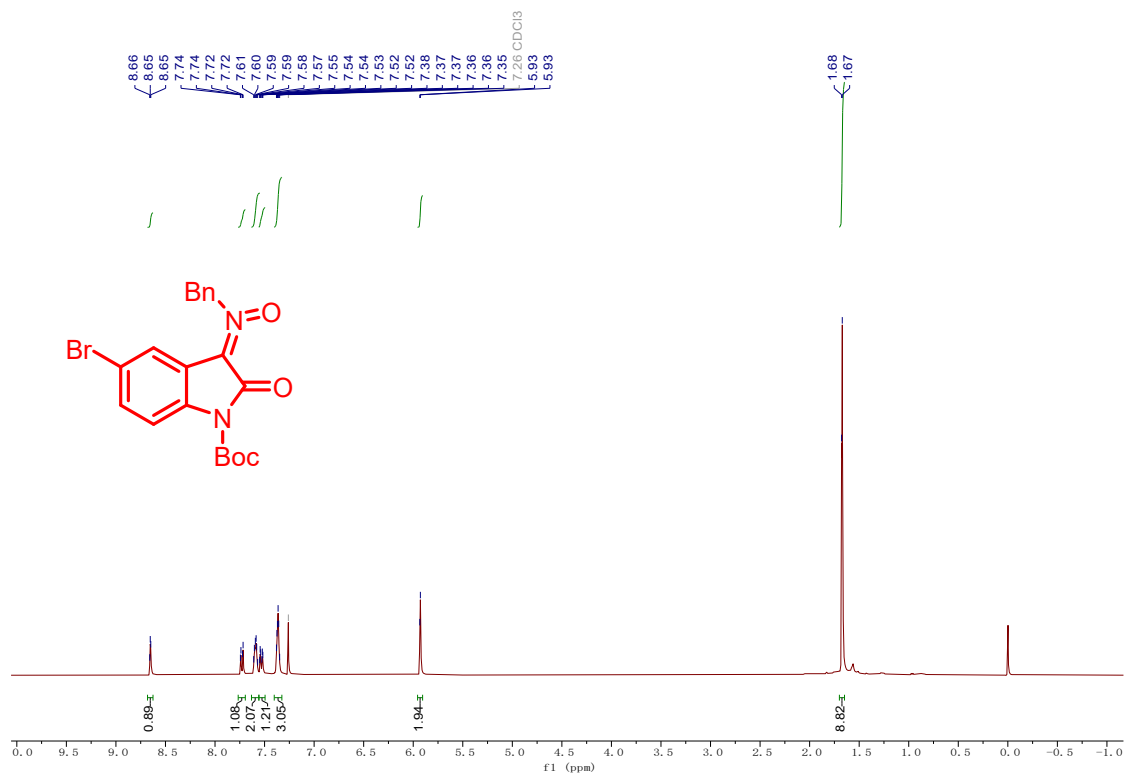

**(Z)-N-benzyl-1-(tert-butoxycarbonyl)-5-methyl-2-oxindolin-3-imine oxide (1e)**

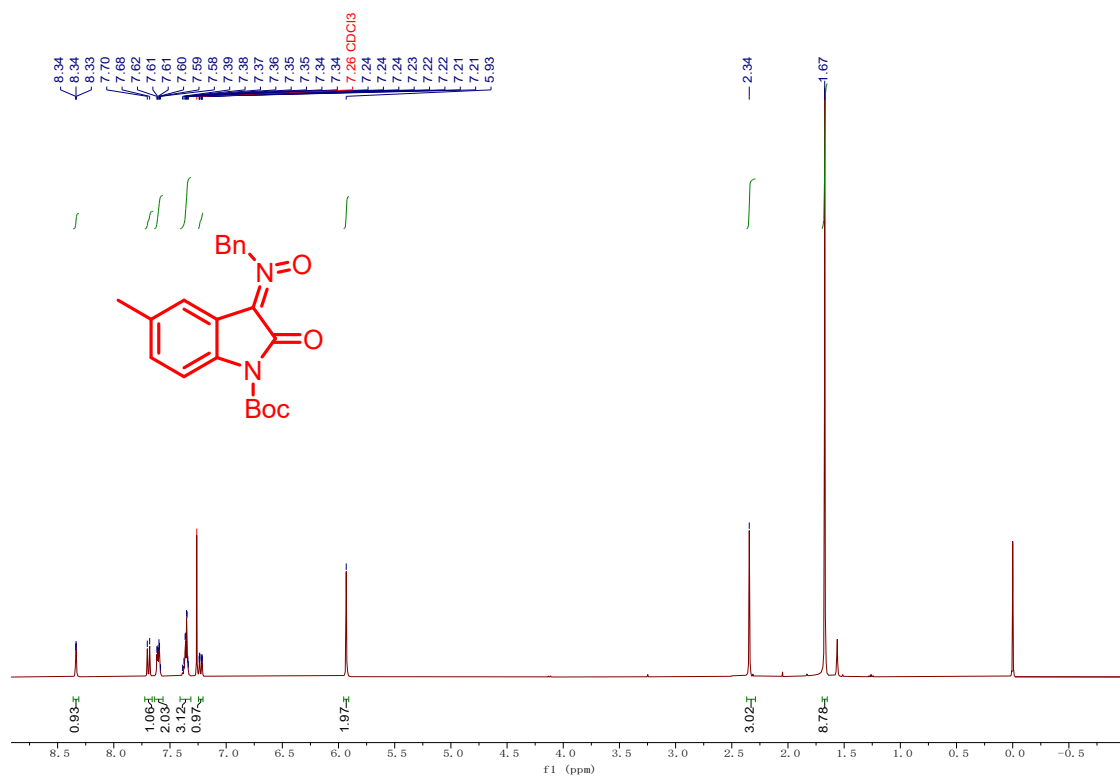

**(Z)-N-benzyl-1-(tert-butoxycarbonyl)-5-methoxy-2-oxoindolin-3-imine oxide(1f)**

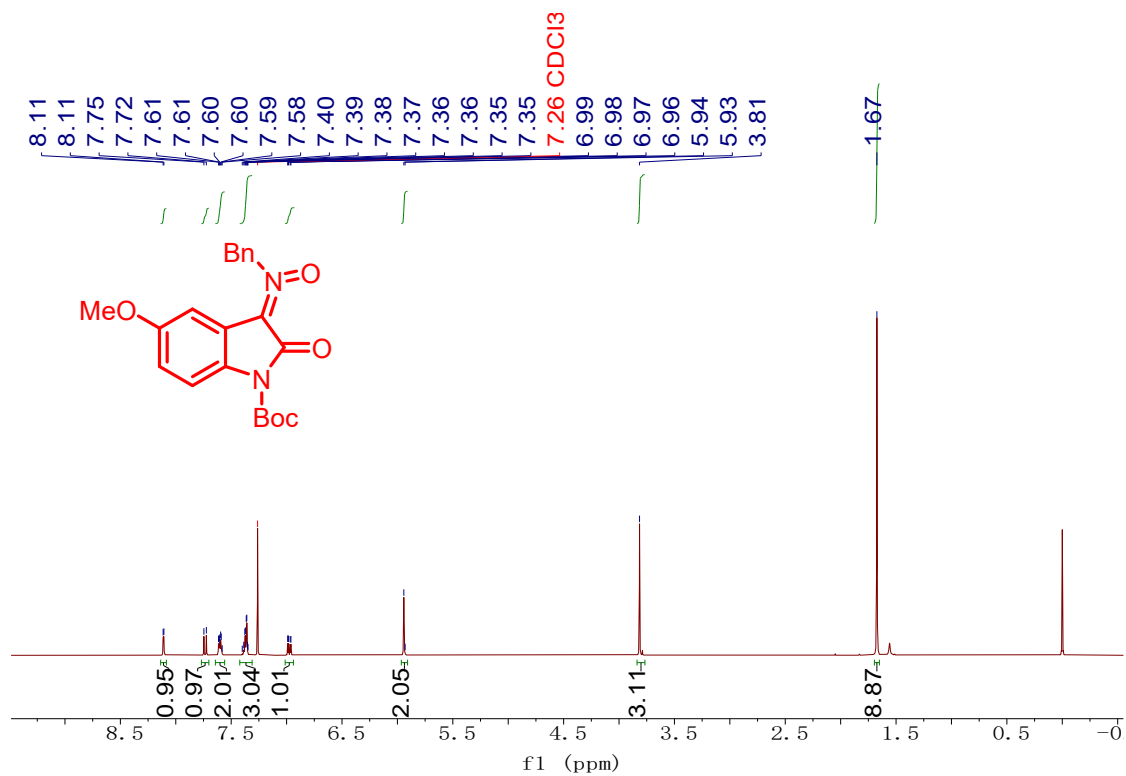

**(Z)-N-benzyl-1-(tert-butoxycarbonyl)-6-chloro-2-oxoindolin-3-imine oxide(1g)**

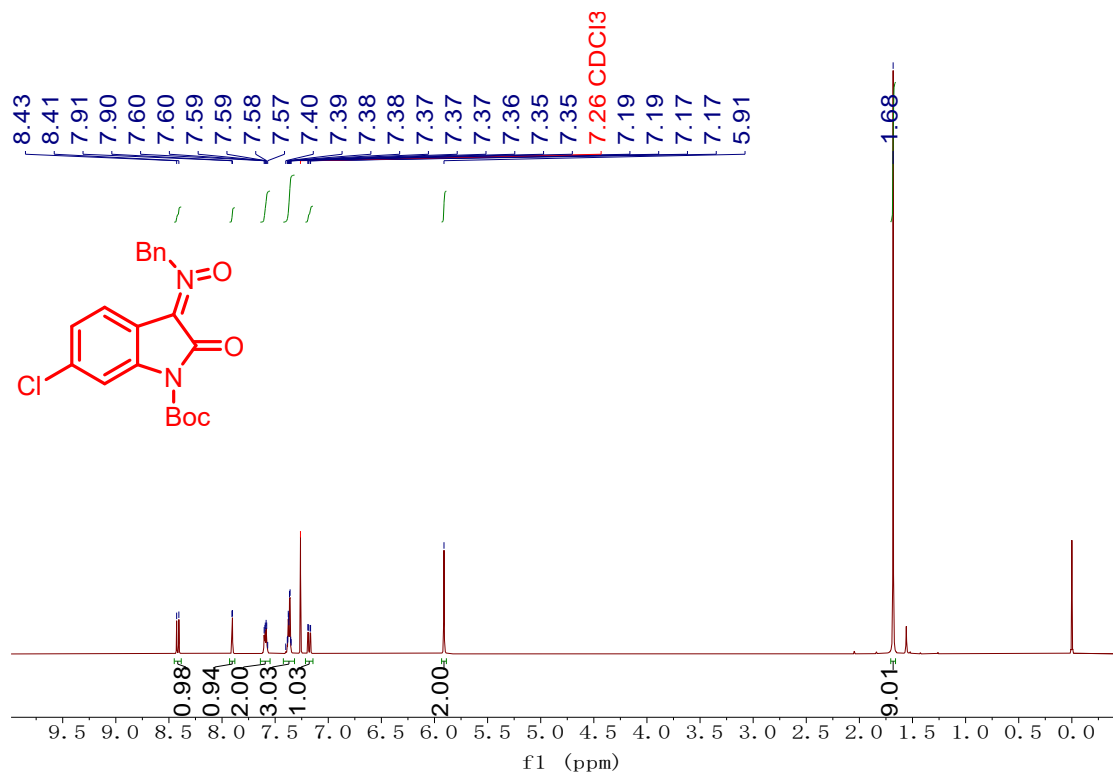

**(Z)-N-benzyl-6-bromo-1-(tert-butoxycarbonyl)-2-oxindolin-3-imine oxide(1h)**

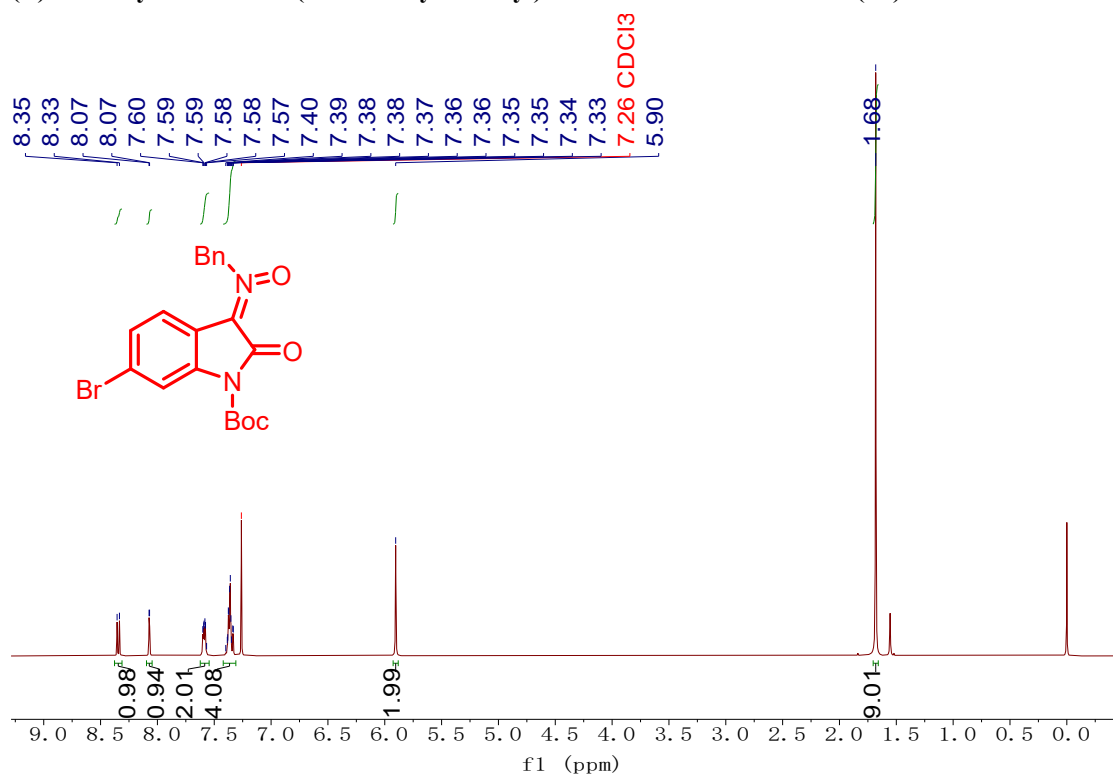

**(Z)-N-benzyl-1-(tert-butoxycarbonyl)-7-methyl-2-oxindolin-3-imine oxide(1i)**

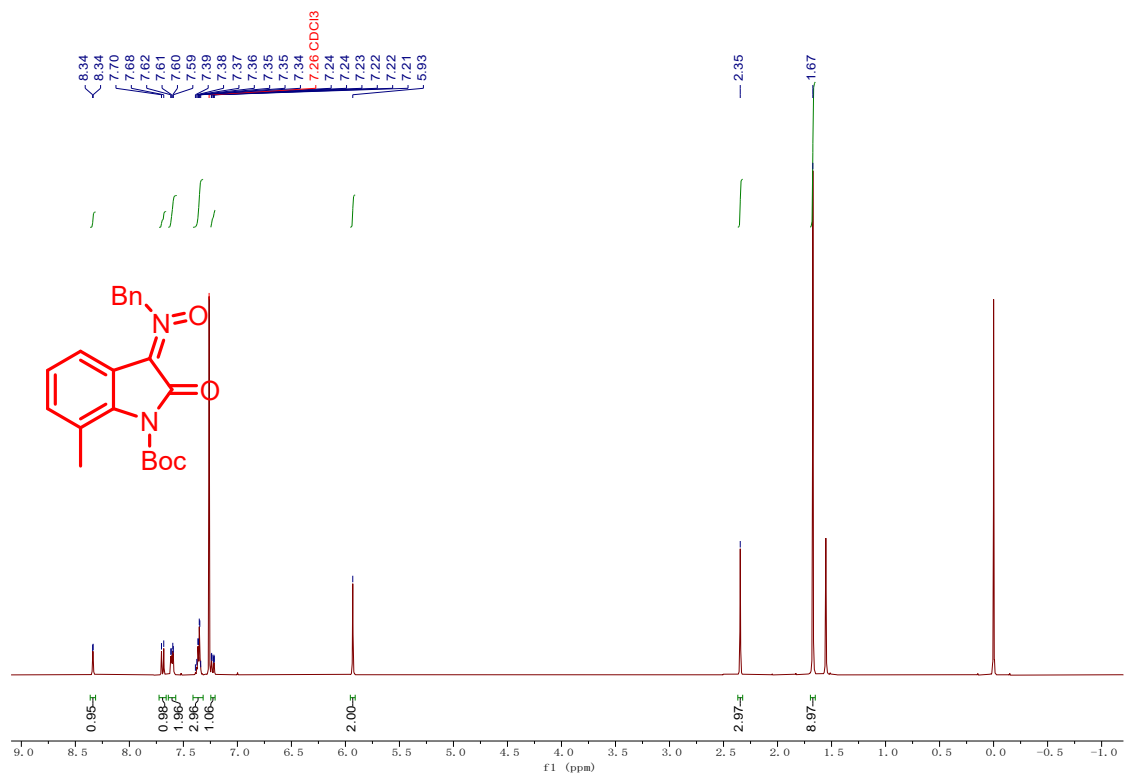

**(Z)-N-benzyl-1-(tert-butoxycarbonyl)-5,7-dimethyl-2-oxindolin-3-imineoxide (1j)**

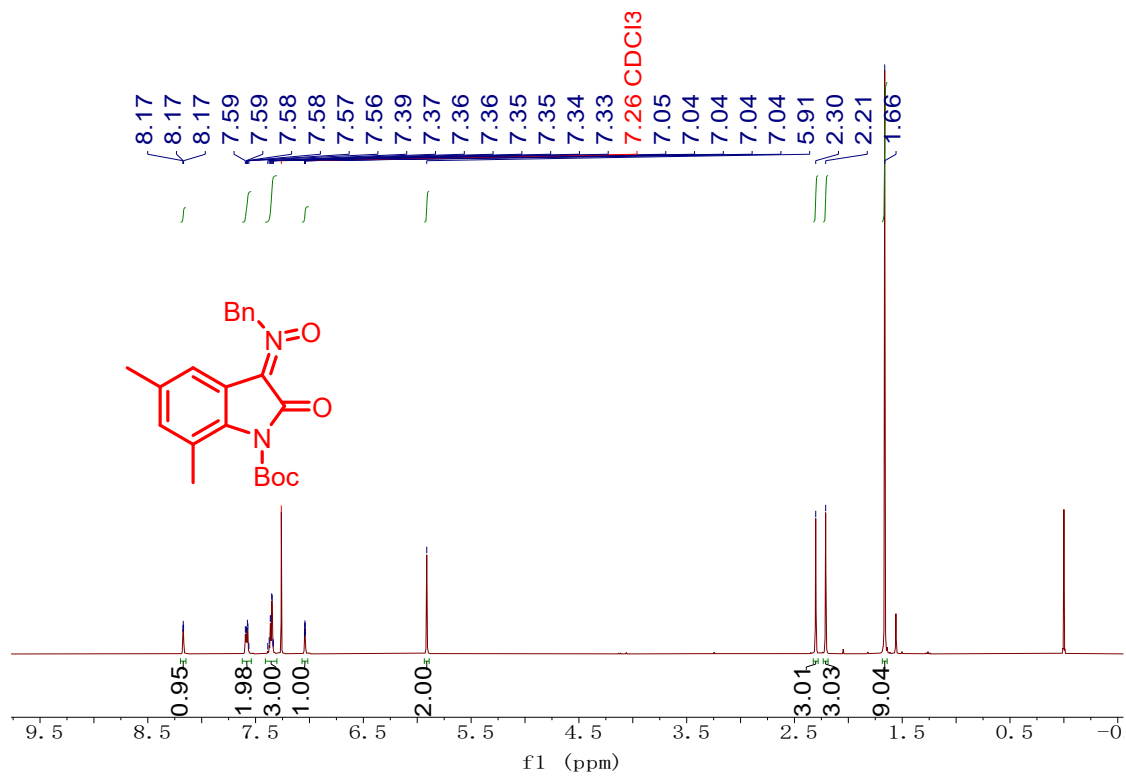

**(Z)-1-(tert-butoxycarbonyl)-N-(2-chlorobenzyl)-2-oxoindolin-3-imine oxide(1k)**

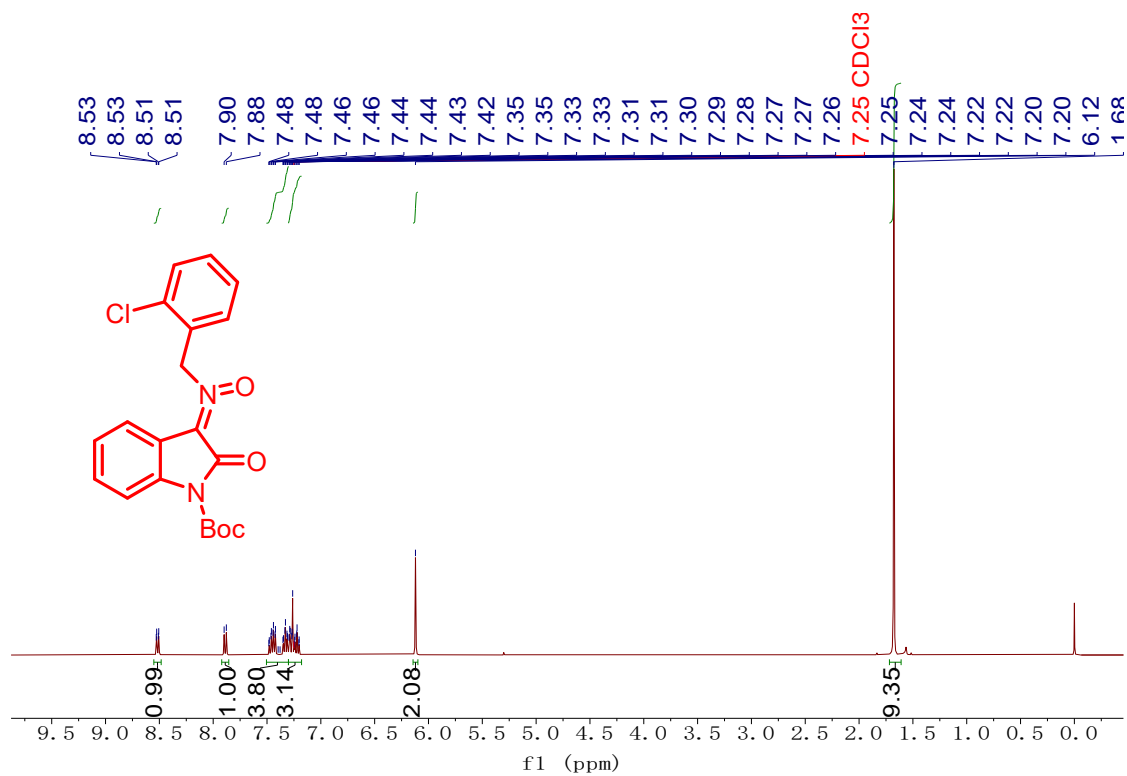

**(Z)-N-(4-bromobenzyl)-1-(tert-butoxycarbonyl)-2-oxoindolin-3-imine oxide(1l)**

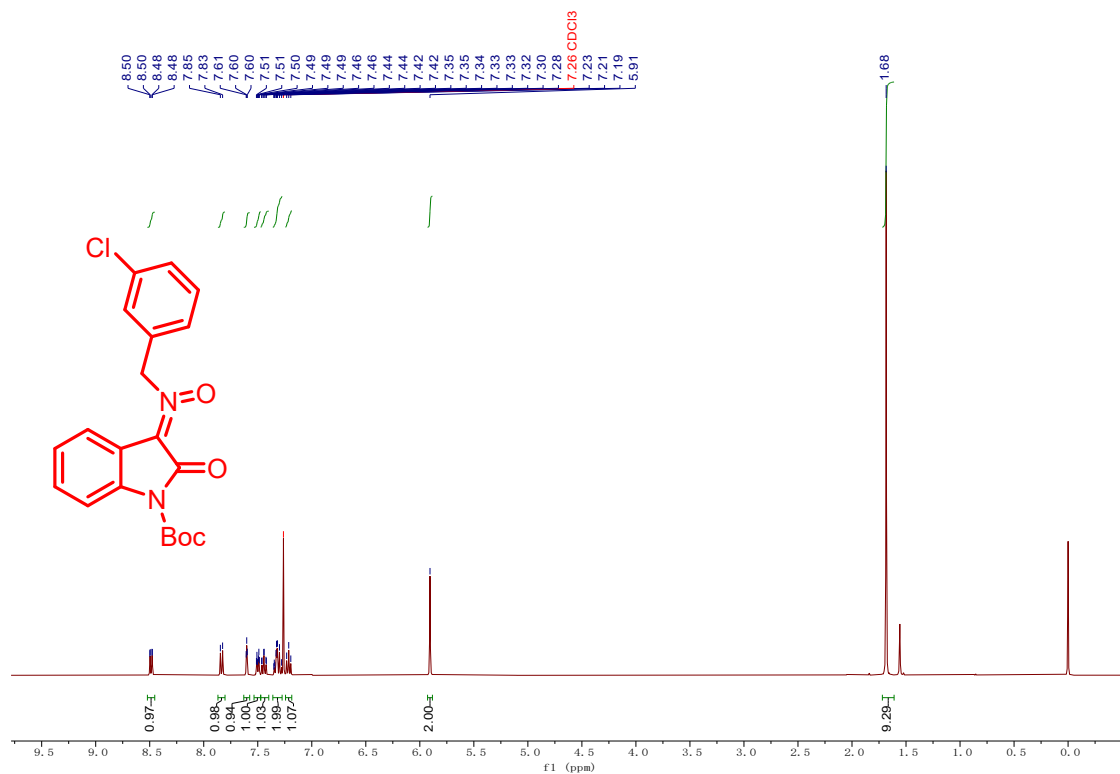

(Z)-1-(tert-butoxycarbonyl)-N-(4-chlorobenzyl)-2-oxoindolin-3-imine oxide(1m)

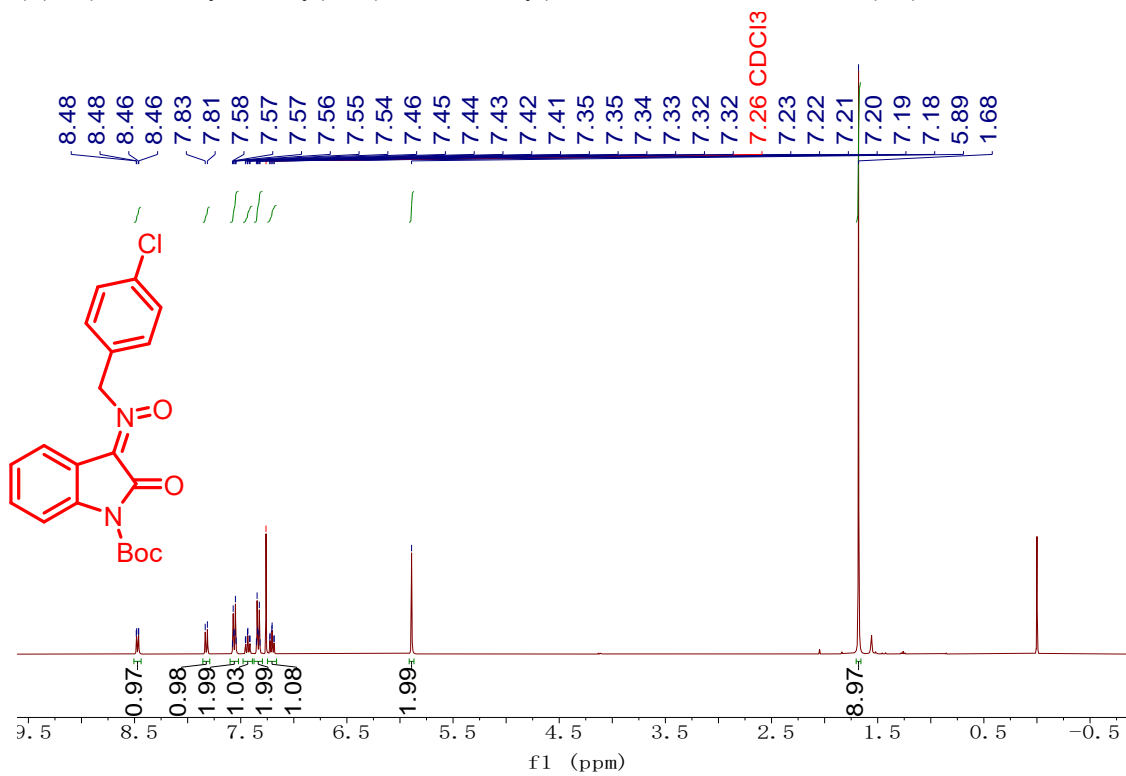

**(Z)-1-(tert-butoxycarbonyl)-N-(3-chlorobenzyl)-2-oxoindolin-3-imine oxide(1n)**

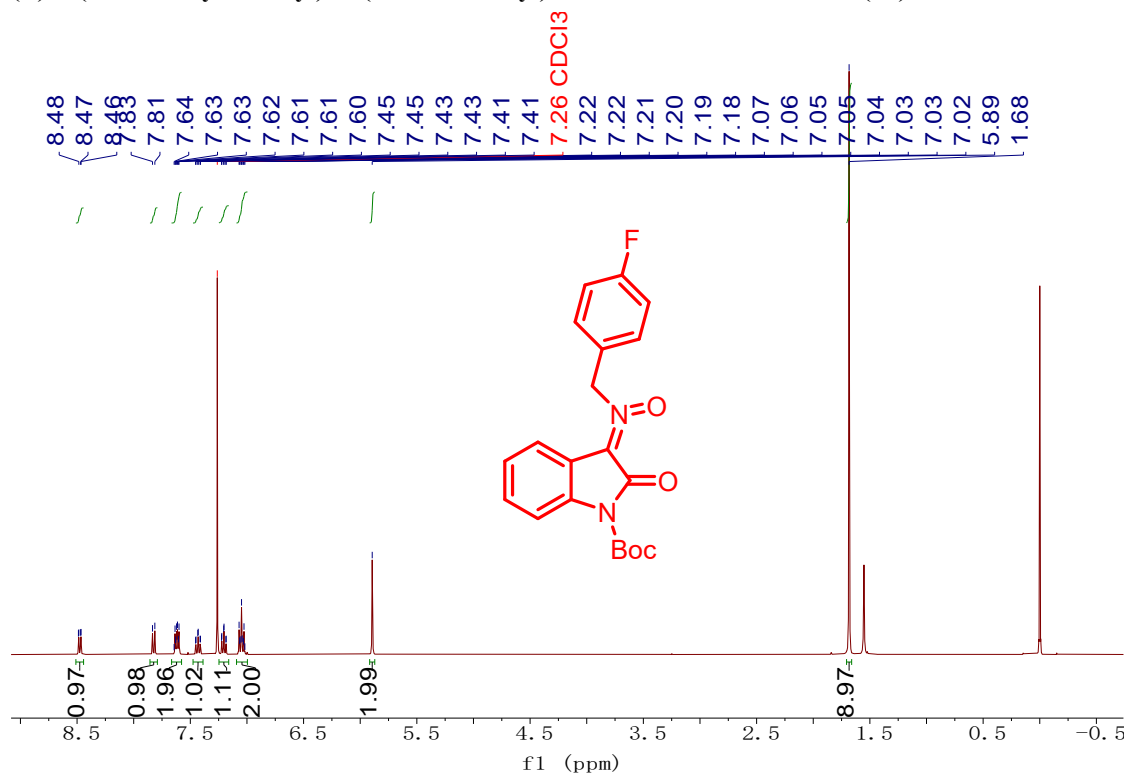

**(Z)-1-(tert-butoxycarbonyl)-N-(4-fluorobenzyl)-2-oxoindolin-3-imine oxide(1o)**

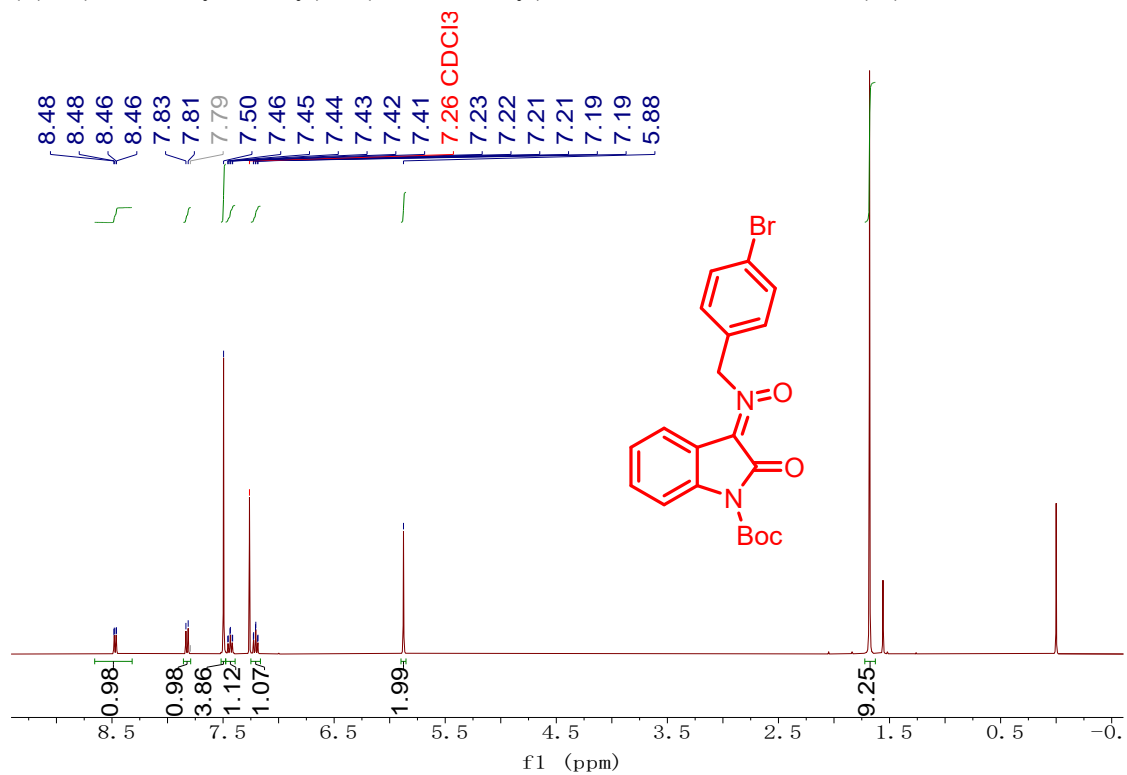

**(Z)-1-(tert-butoxycarbonyl)-N-(4-methylbenzyl)-2-oxoindolin-3-imine oxide(1p)**

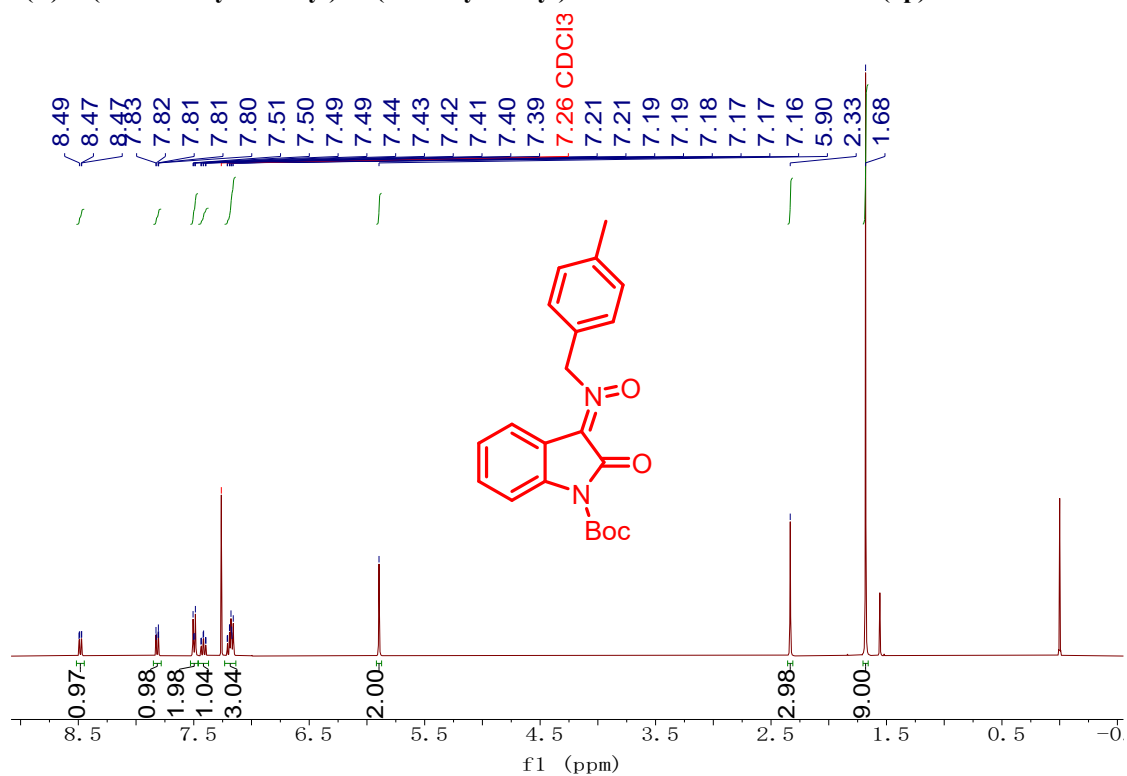

**(Z)-1-(tert-butoxycarbonyl)-N-(4-methoxybenzyl)-2-oxoindolin-3-imine oxide(1q)**

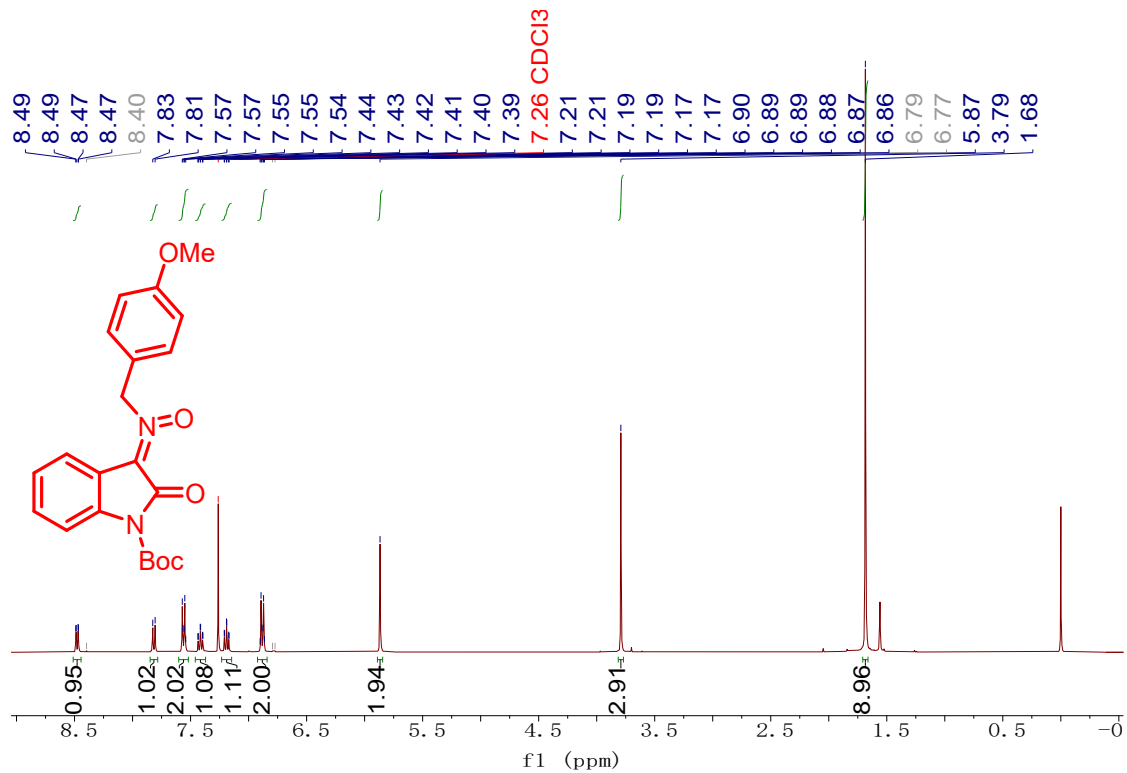

**(Z)-1-(tert-butoxycarbonyl)-N-(naphthalen-1-ylmethyl)-2-oxoindolin-3-imine oxide(1r)**

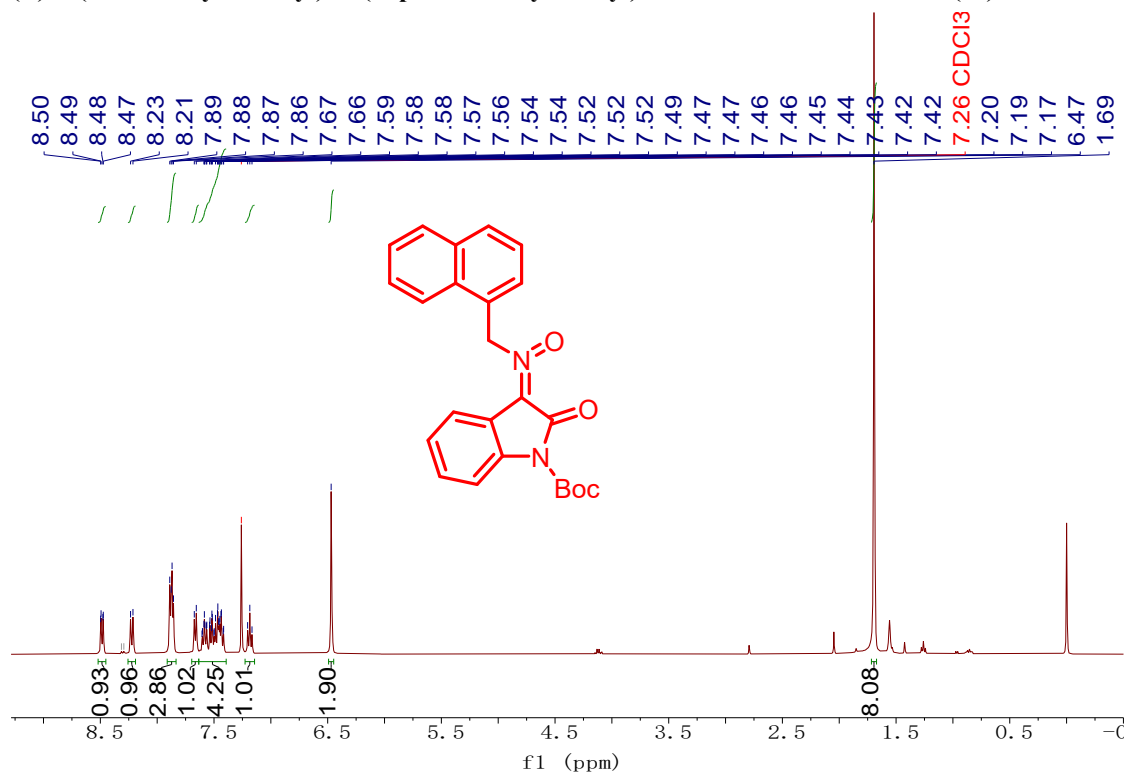

**(Z)-1-(tert-butoxycarbonyl)-2-oxo-N-phenethylindolin-3-imine oxide(1s)**

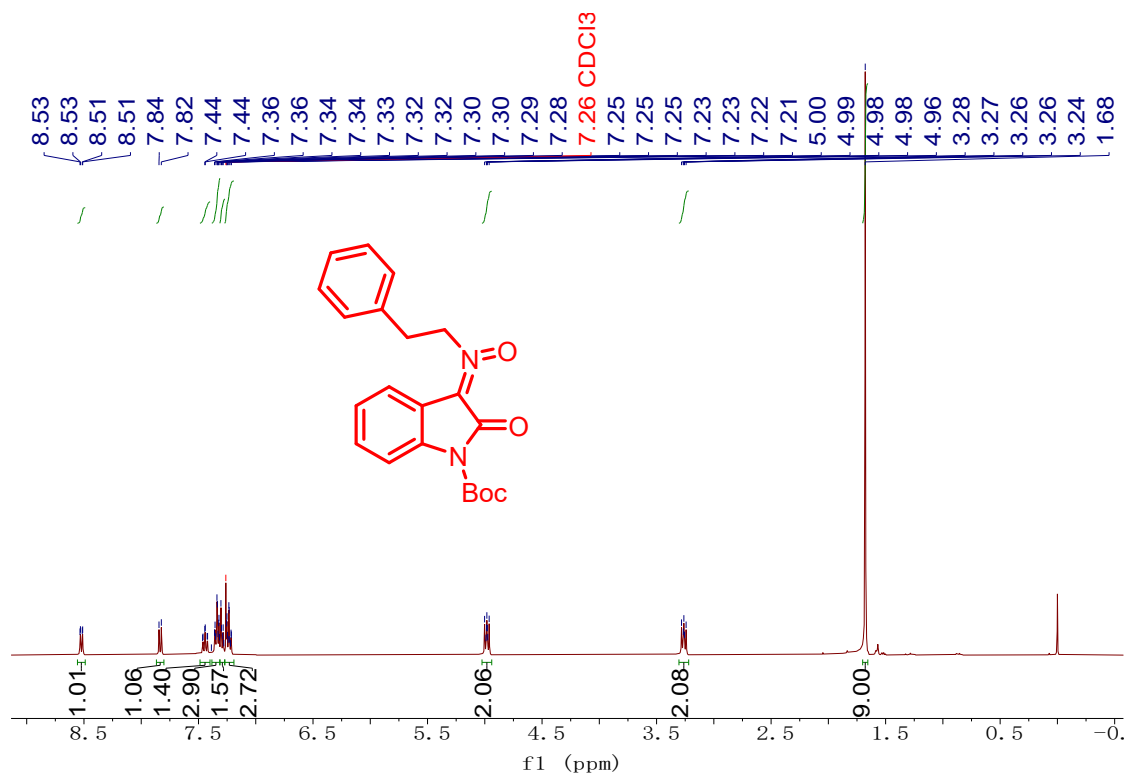

**(Z)-1-(tert-butoxycarbonyl)-N-(4-chlorobenzyl)-2-oxindolin-3-imine oxide(1t)**

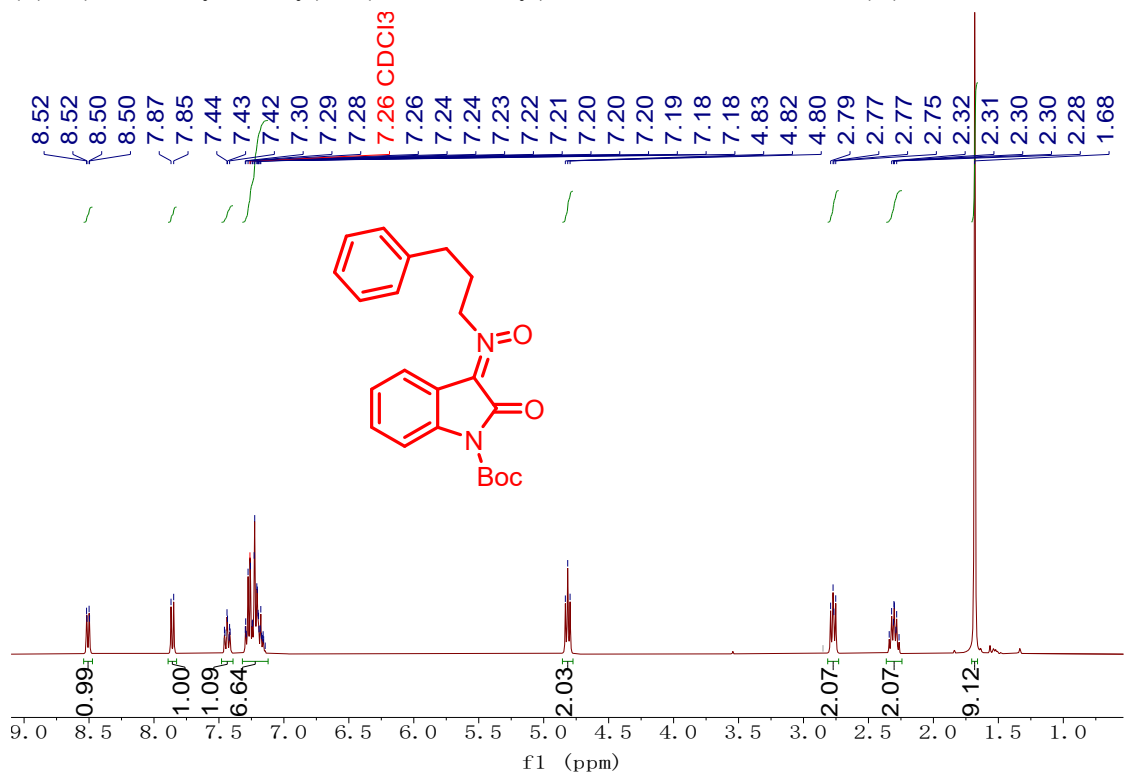

**(Z)-1-(tert-butoxycarbonyl)-N-octyl-2-oxindolin-3-imine oxide(1u)**

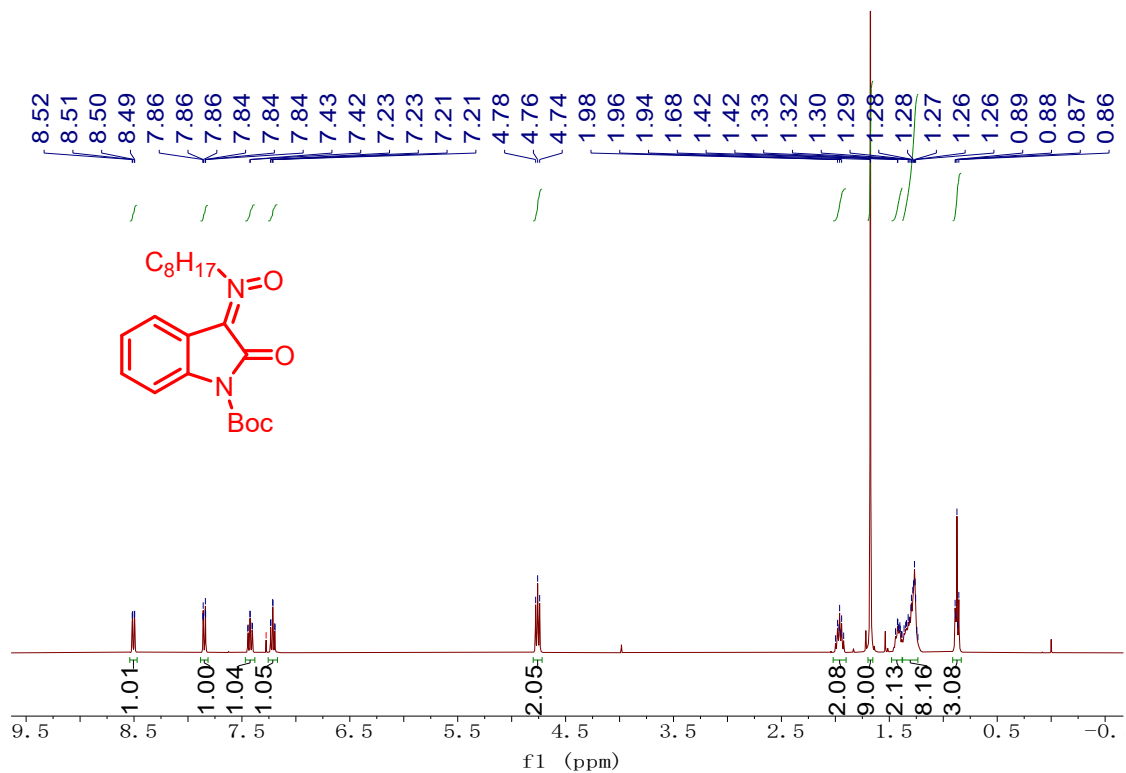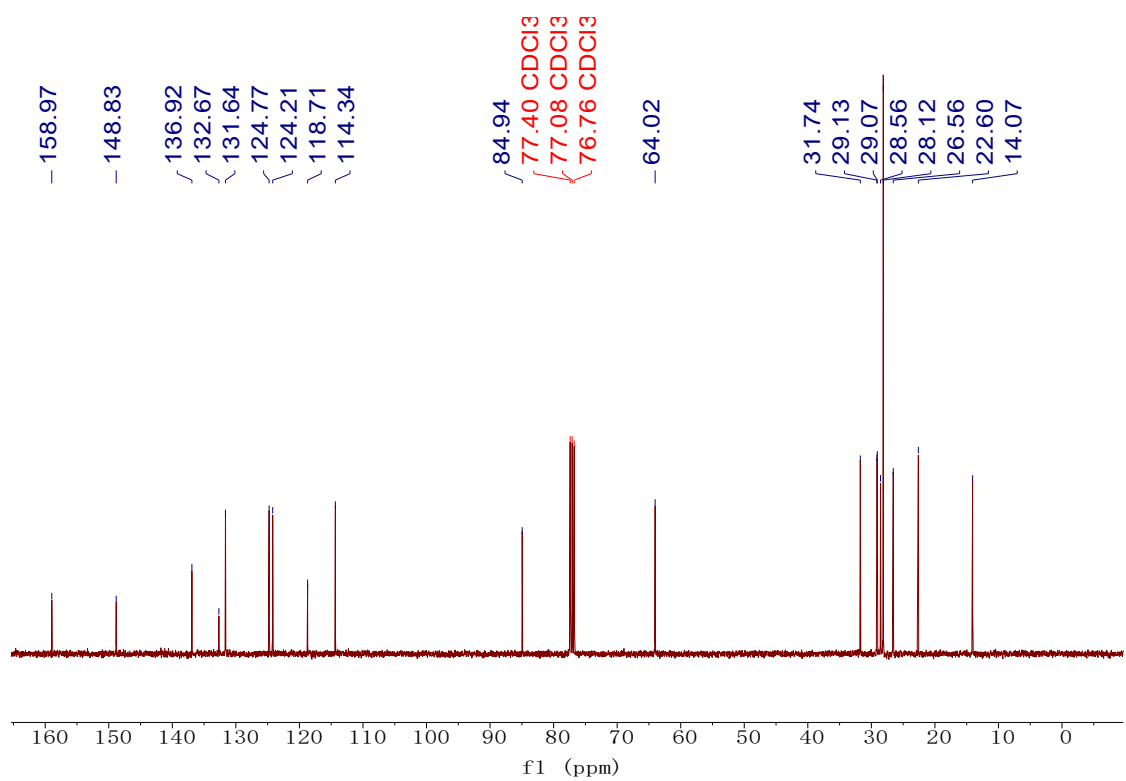

**tert-butyl(3R,4'R)-2'-benzyl-2,6'-dioxo-4'-(m-tolyl)spiro[indoline-3,3'-[1,2]oxazinane]-1-carboxylate (3a)**

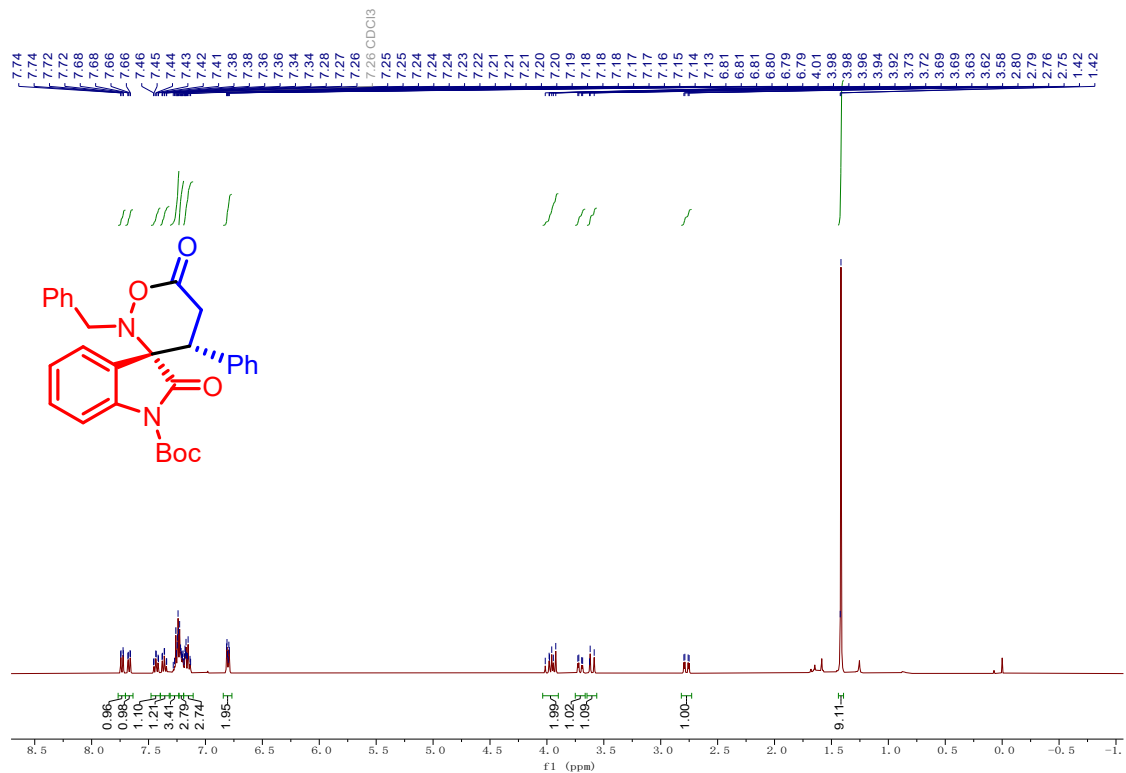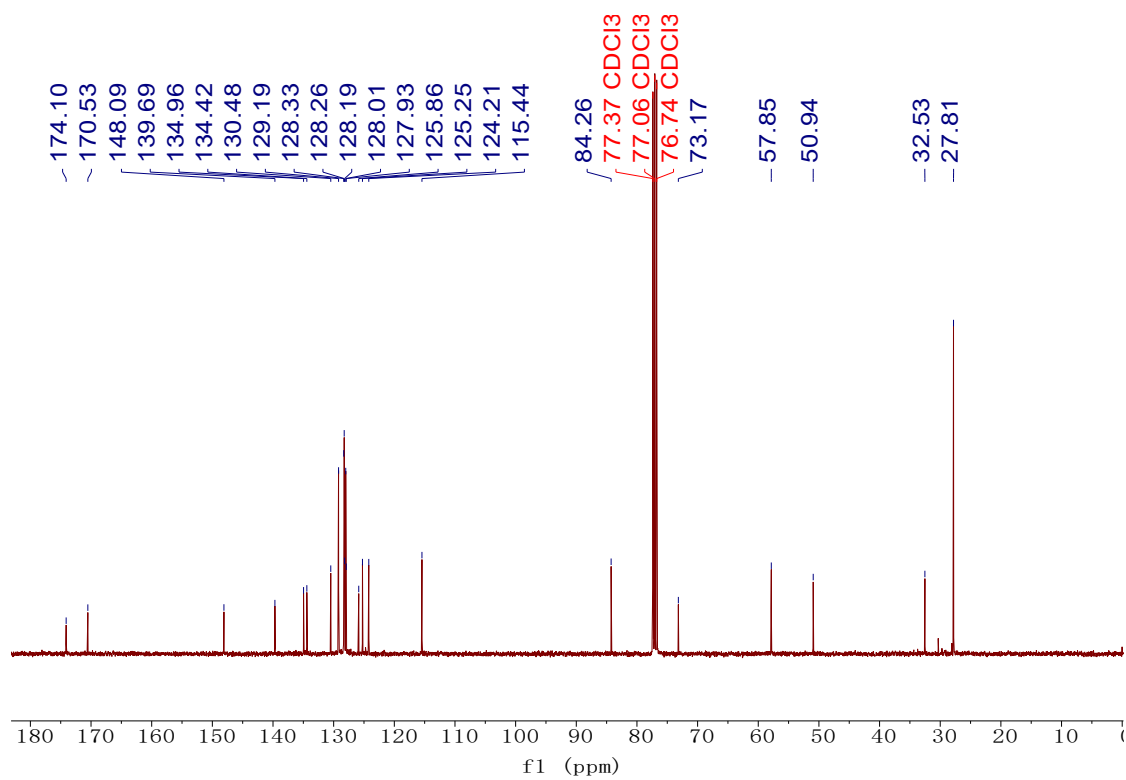

**tert-butyl(3R,4'R)-2'-benzyl-5-fluoro-2,6'-dioxo-4'-phenylspiro[indoline-3,3'-[1,2]oxazinane]-1-carboxylate(3b)**

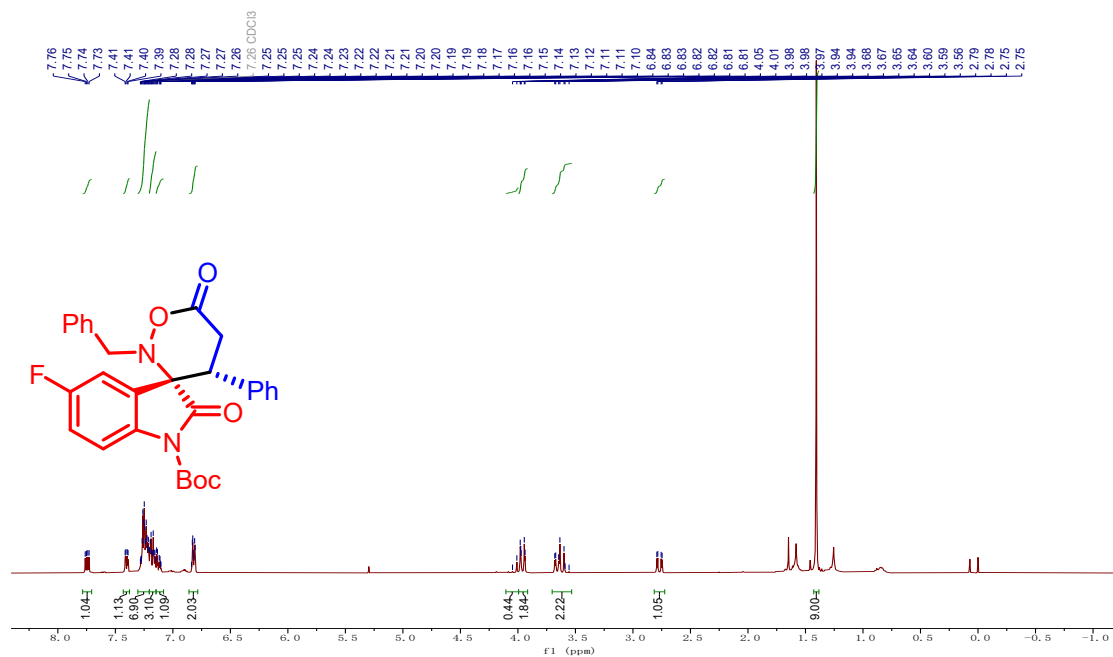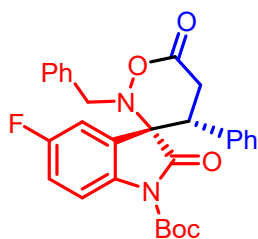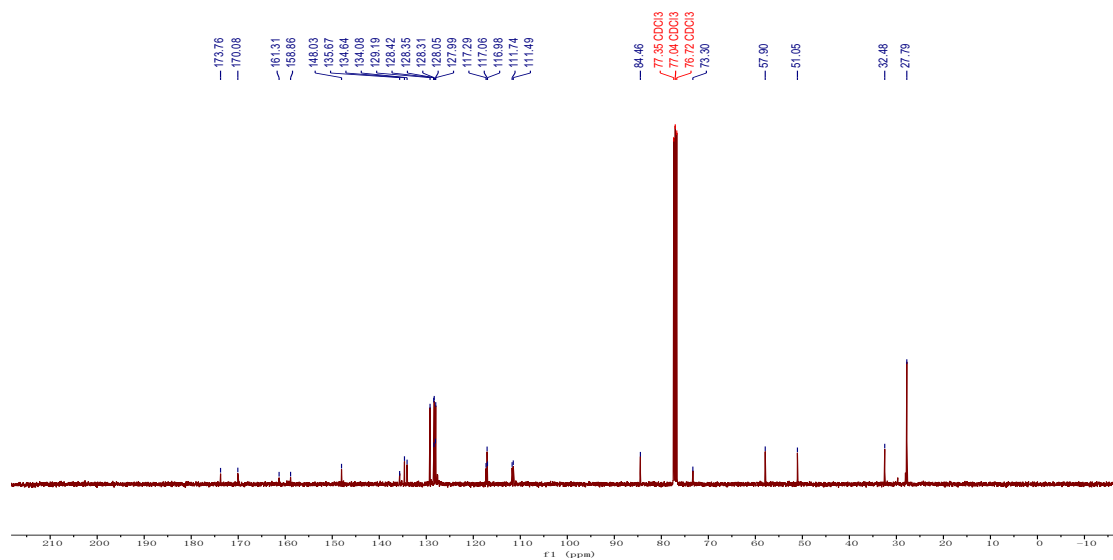

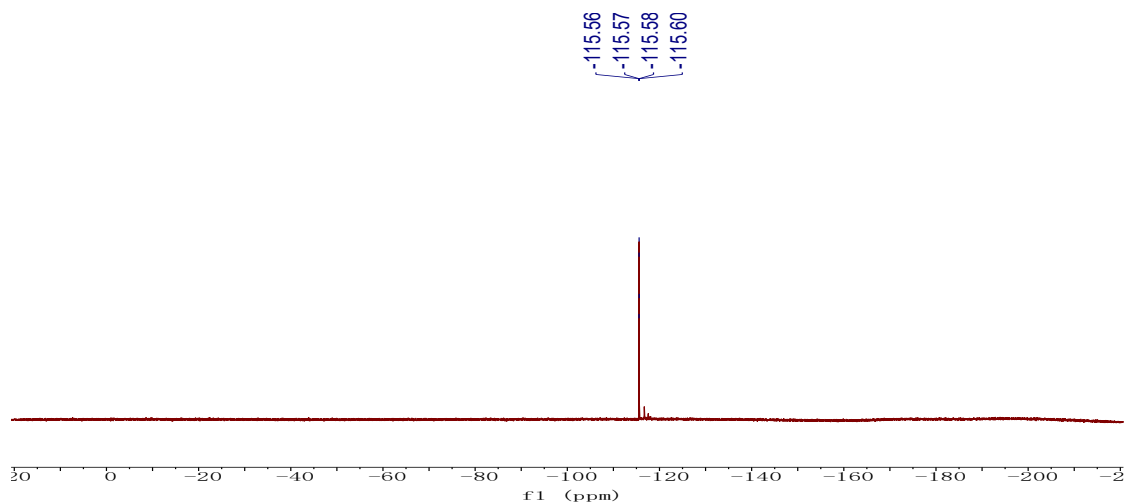

**tert-butyl(3R,4'R)-2'-benzyl-5-chloro-2,6'-dioxo-4'-phenylspiro[indoline-3,3'-[1,2]oxazinane]-1-carboxylate (3c)**

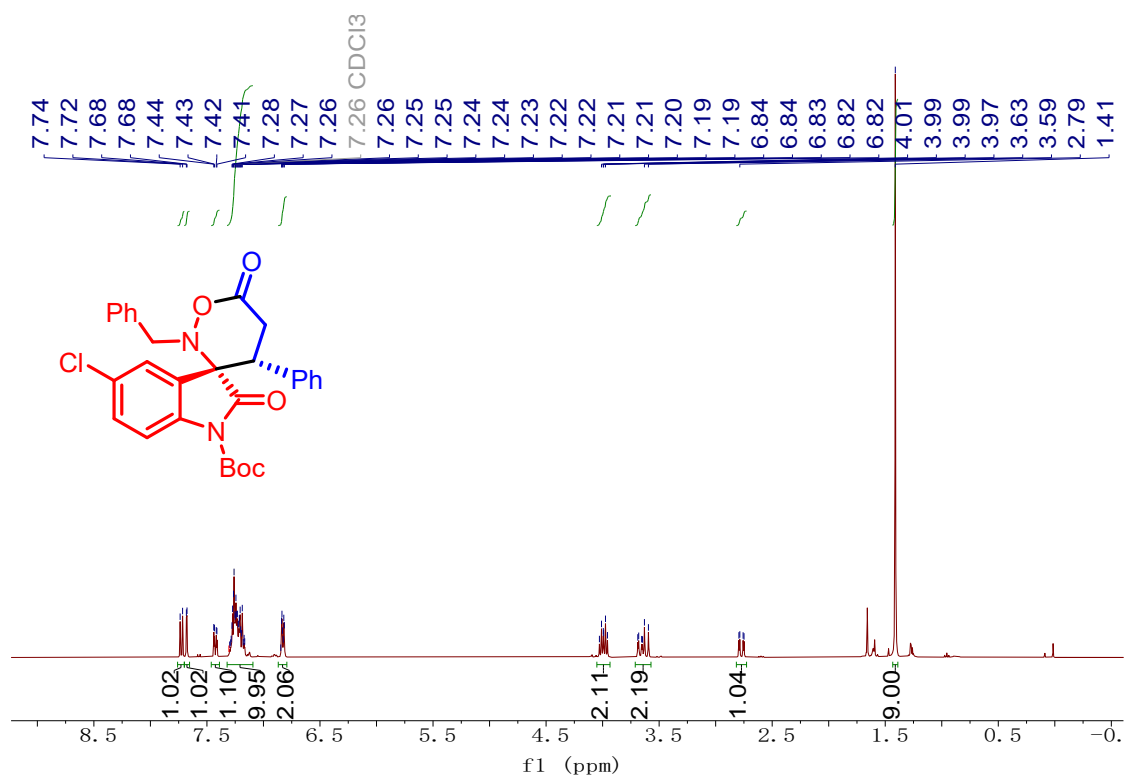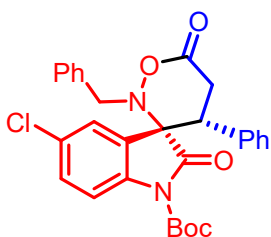

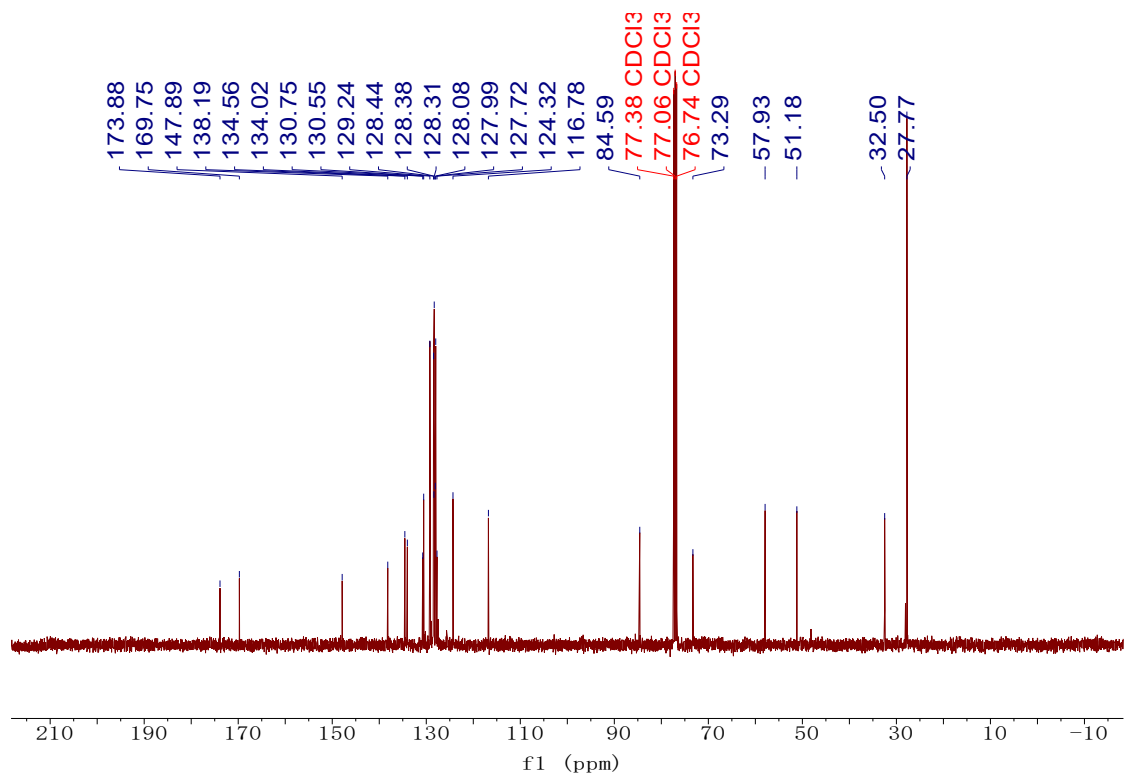

tert-butyl(3R,4'R)-2'-benzyl-5-bromo-2,6'-dioxo-4'-phenylspiro[indoline-3,3'-[1,2]oxazinane]-1-carboxylate(3d)

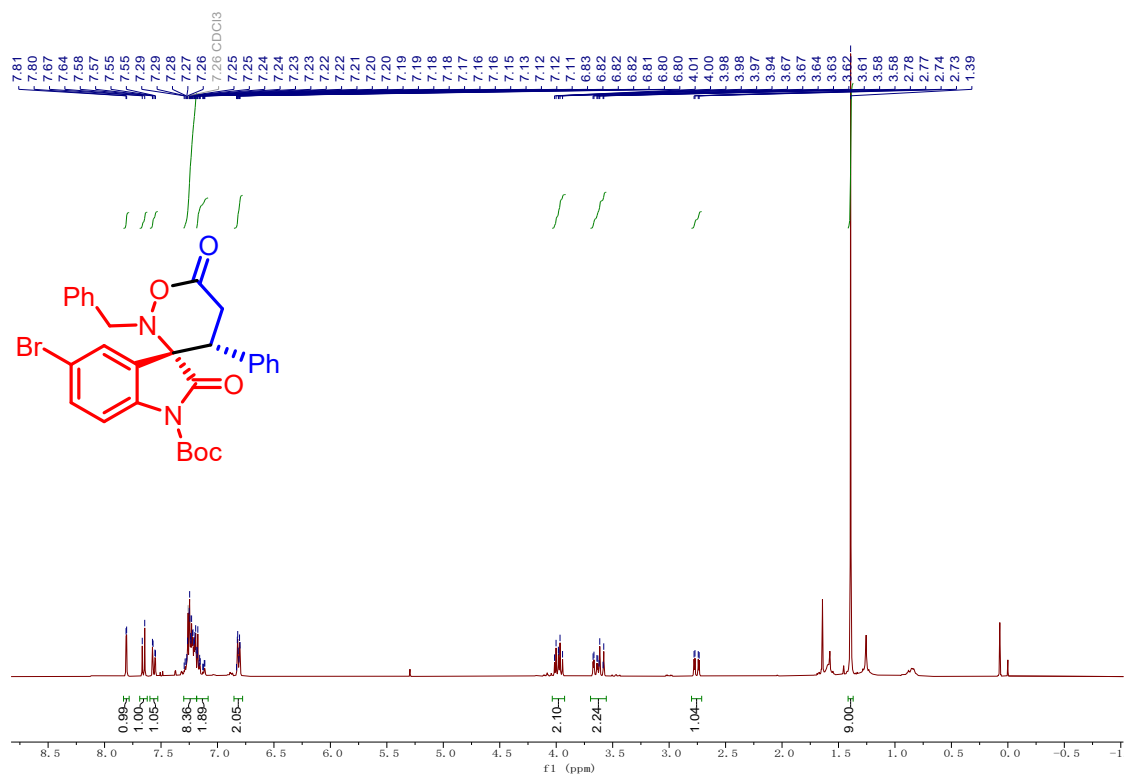

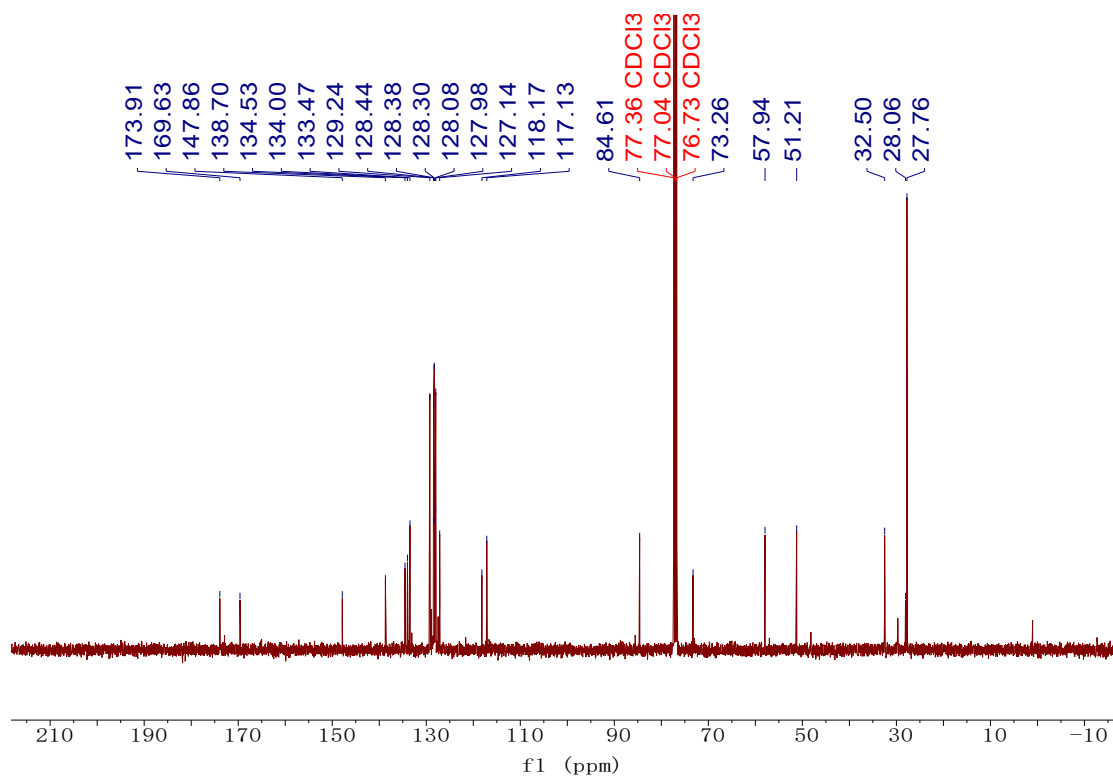

**tert-butyl(3R,4'R)-2'-benzyl-5-methyl-2,6'-dioxo-4'-phenylspiro[indoline-3,3'-[1,2]oxazinane]-1-carboxylate (3e)**

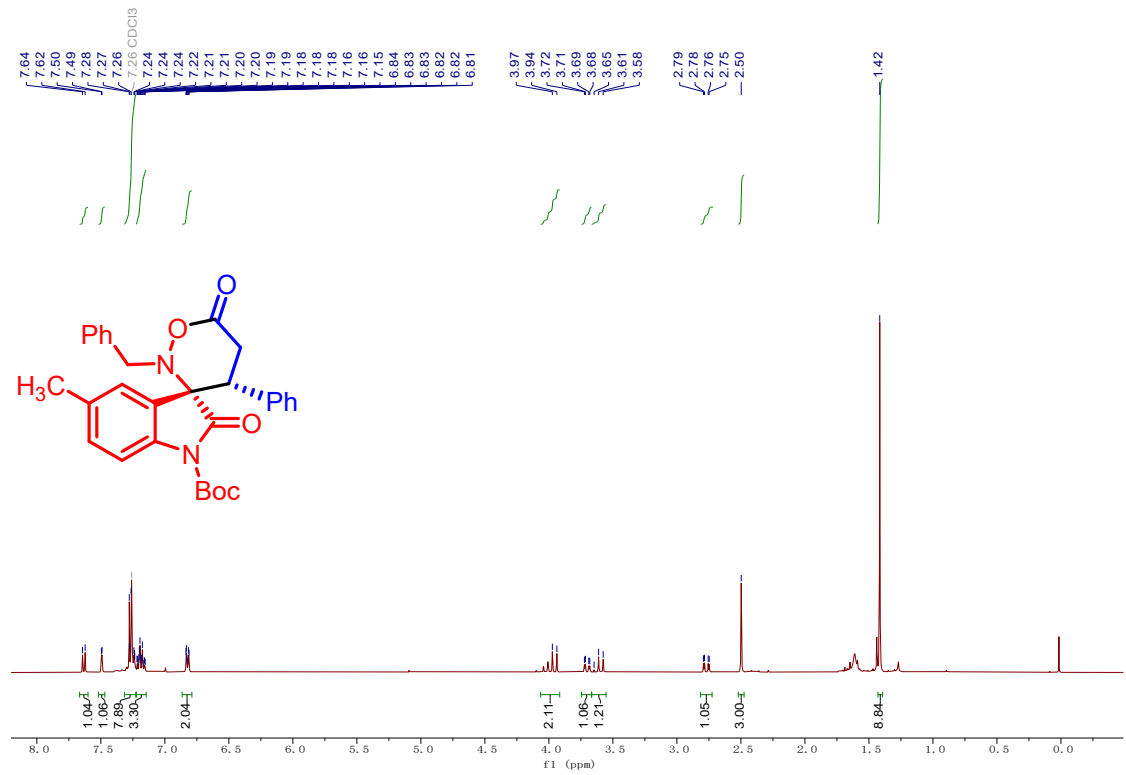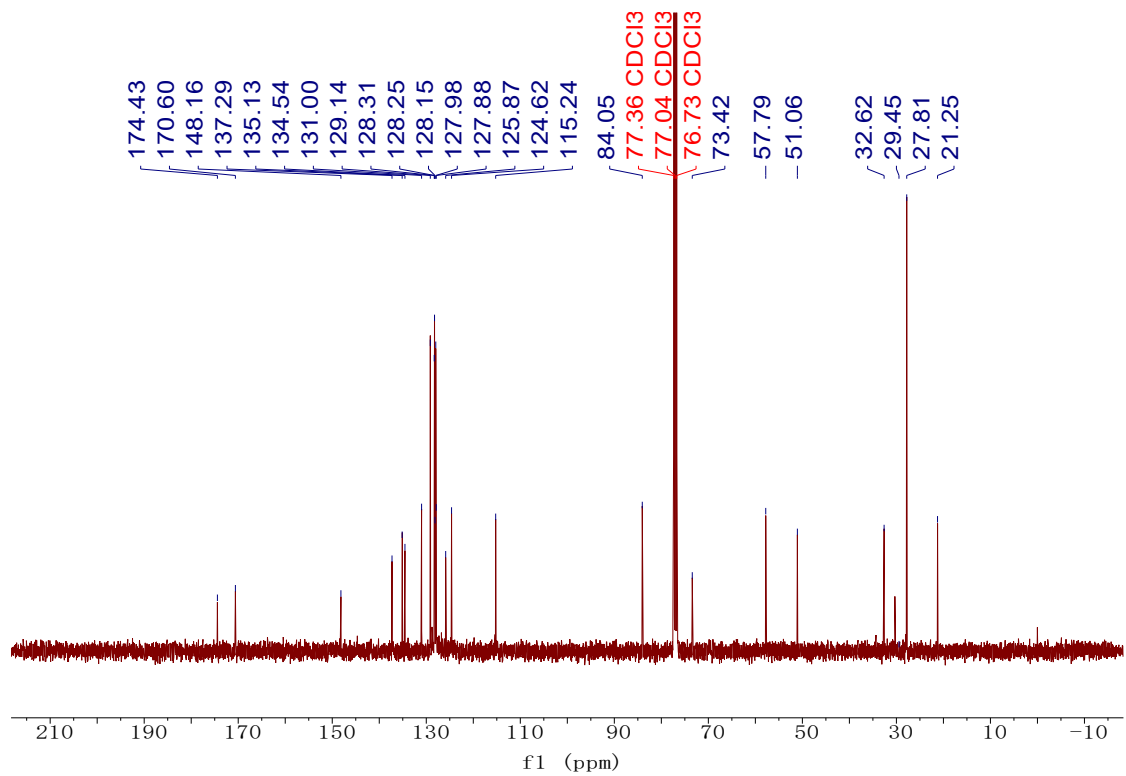

tert-butyl(3R,4'R)-2'-benzyl-5-methoxy-2,6'-dioxo-4'-phenylspiro[indoline-3,3'-[1,2]oxazinane]-1-carboxylate(3f)

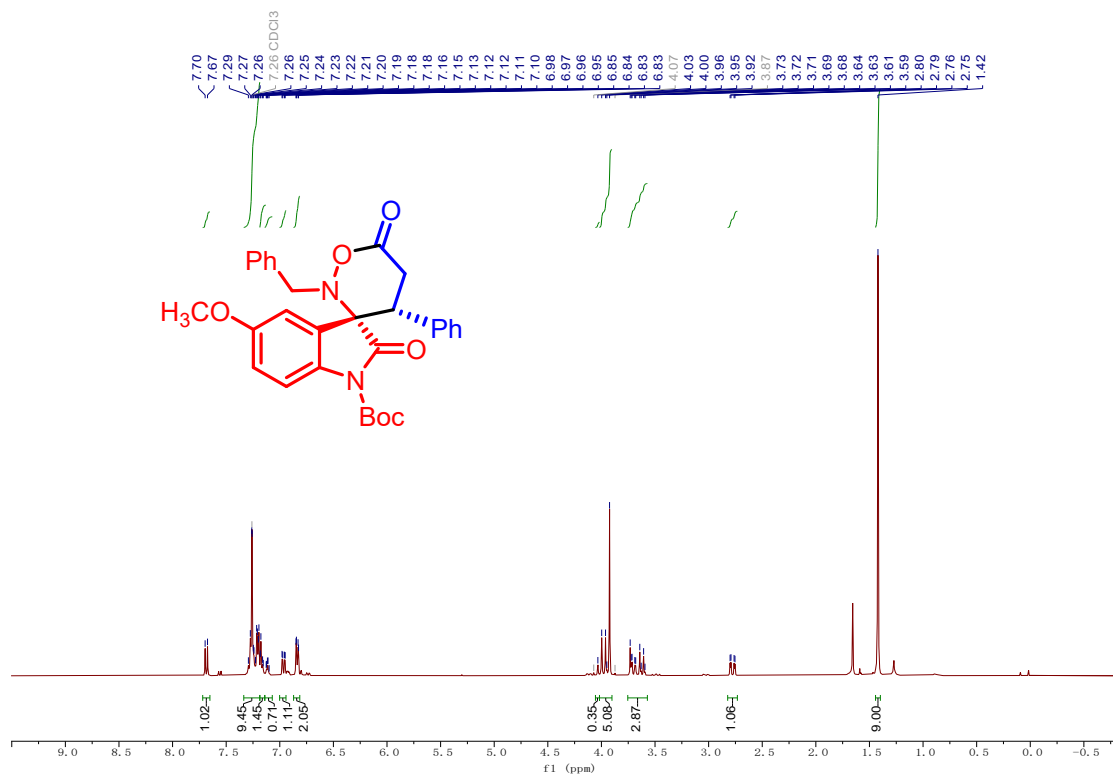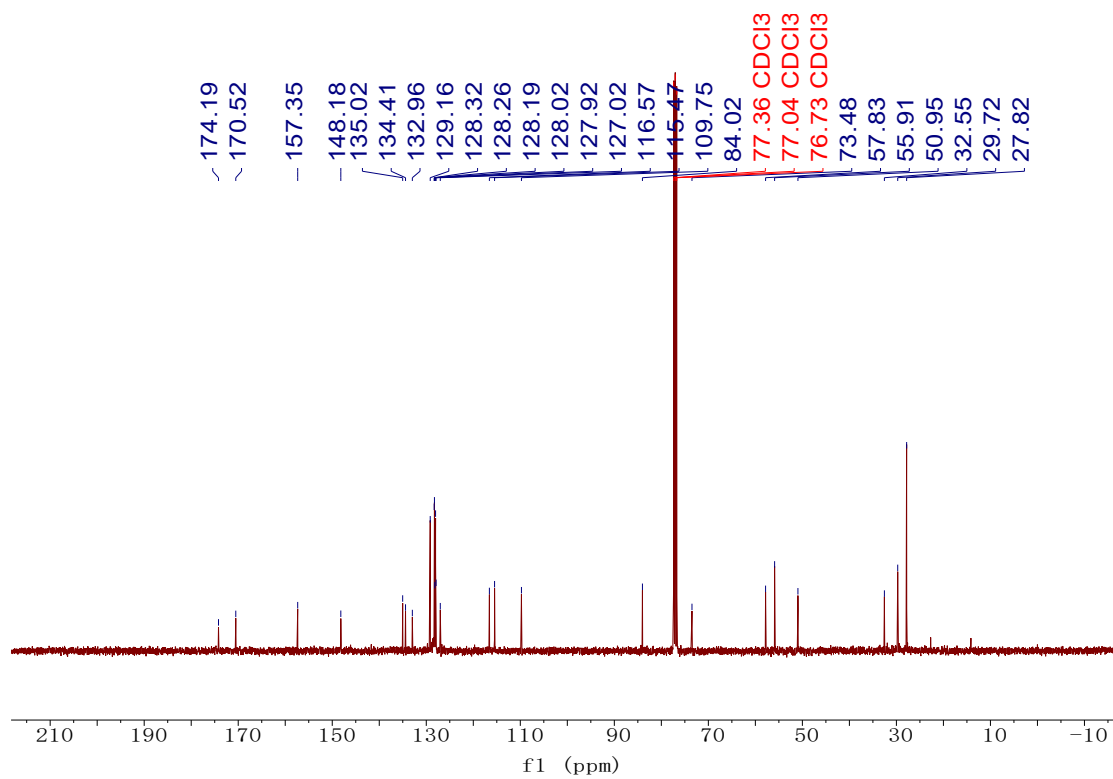



**tert-butyl(3R,4'R)-2'-benzyl-6-bromo-2,6'-dioxo-4'-phenylspiro[indoline-3,3'-[1,2]oxazinane]-1-carboxylate(3h)**

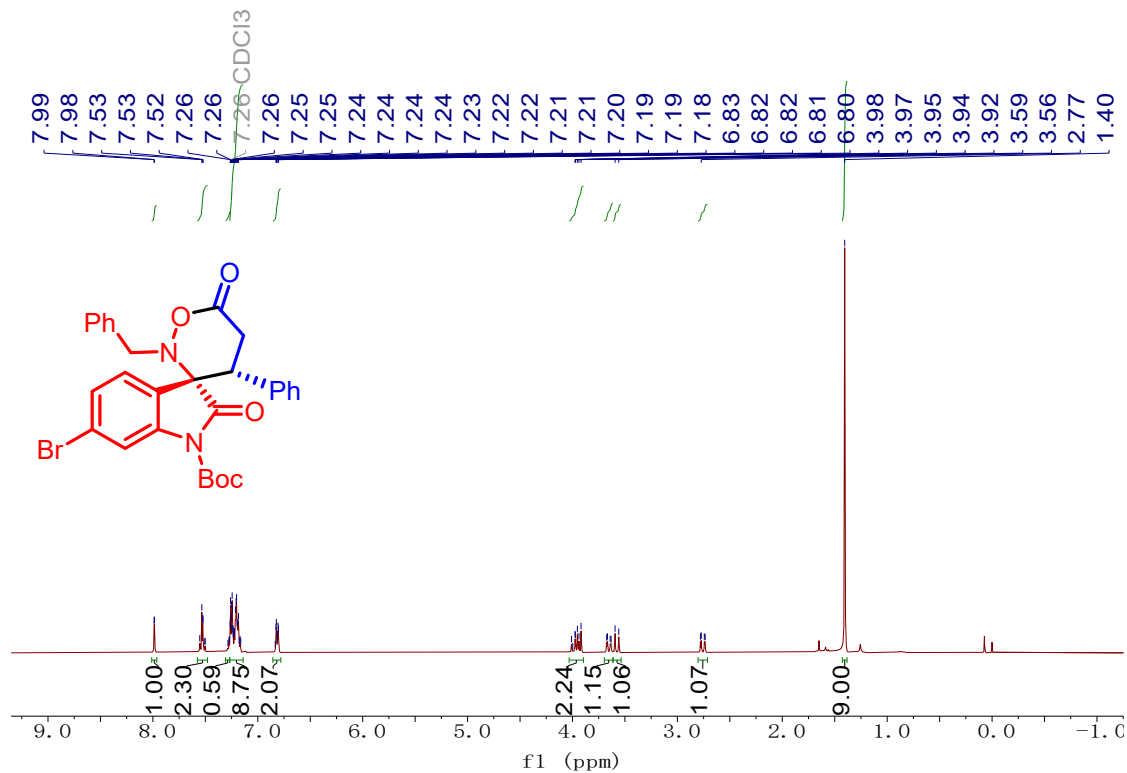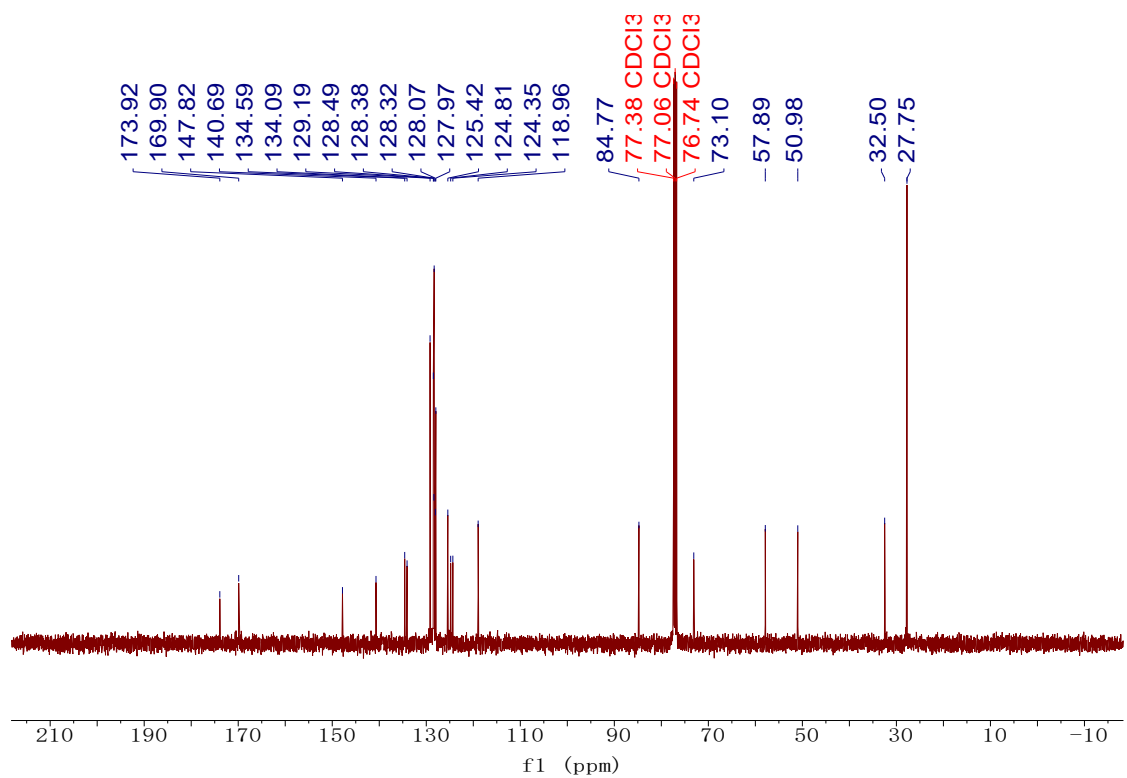

**tert-butyl(3R,4'R)-2'-benzyl-7-methyl-2,6'-dioxo-4'-phenylspiro[indoline-3,3'-[1,2]oxazinane]-1-carboxylate(3i)**

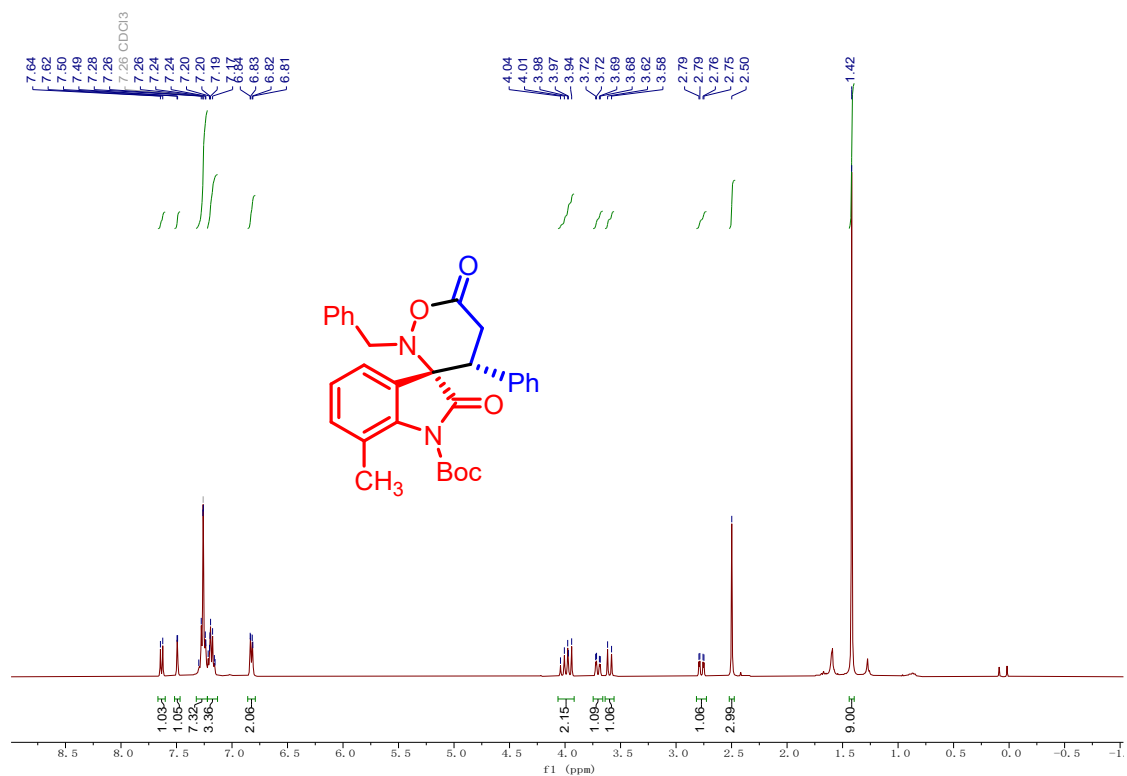

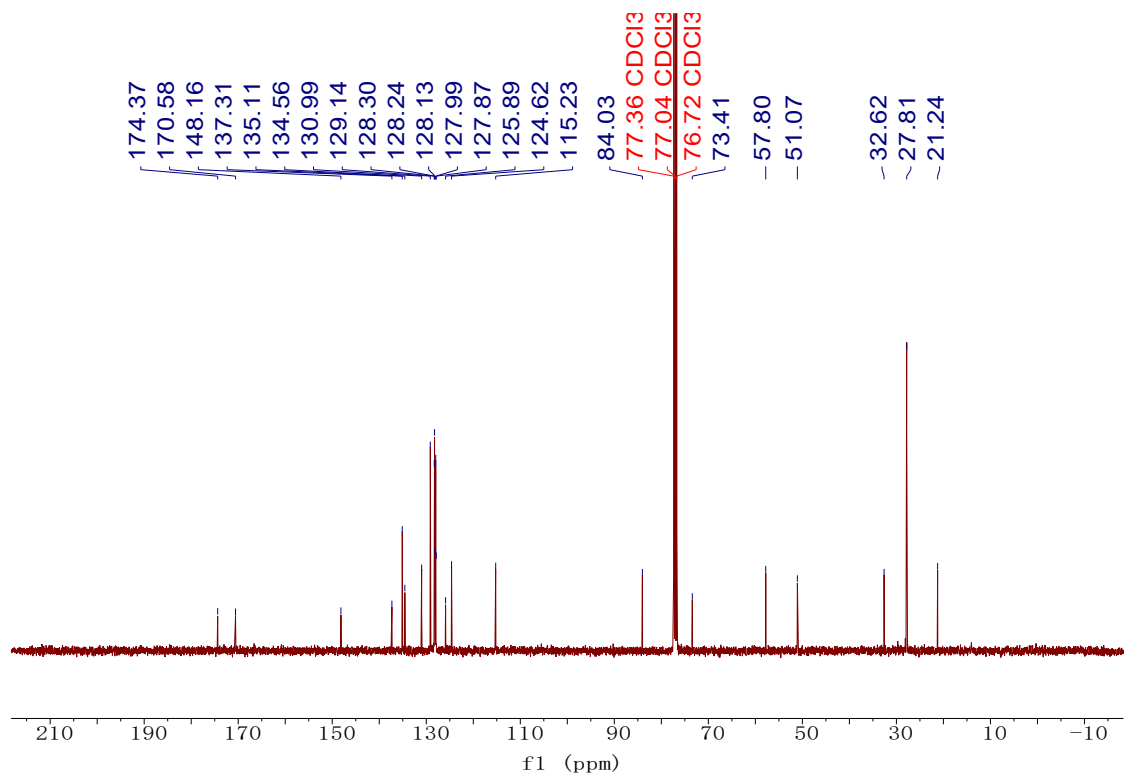

**tert-butyl(3R,4'R)-2'-benzyl-5,7-dimethyl-2,6'-dioxo-4'-phenylspiro[indoline-3,3'-[1,2]oxazinane]-1-carboxylate (3j)**

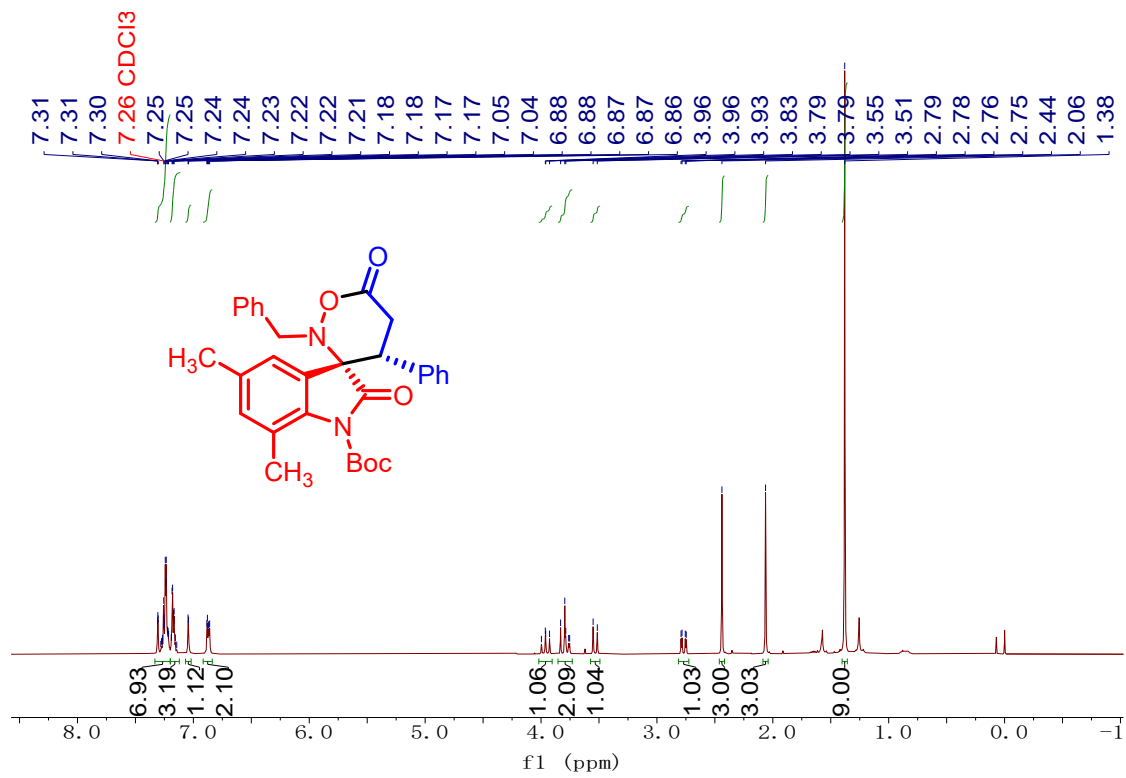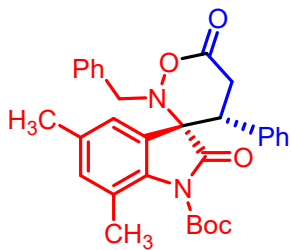

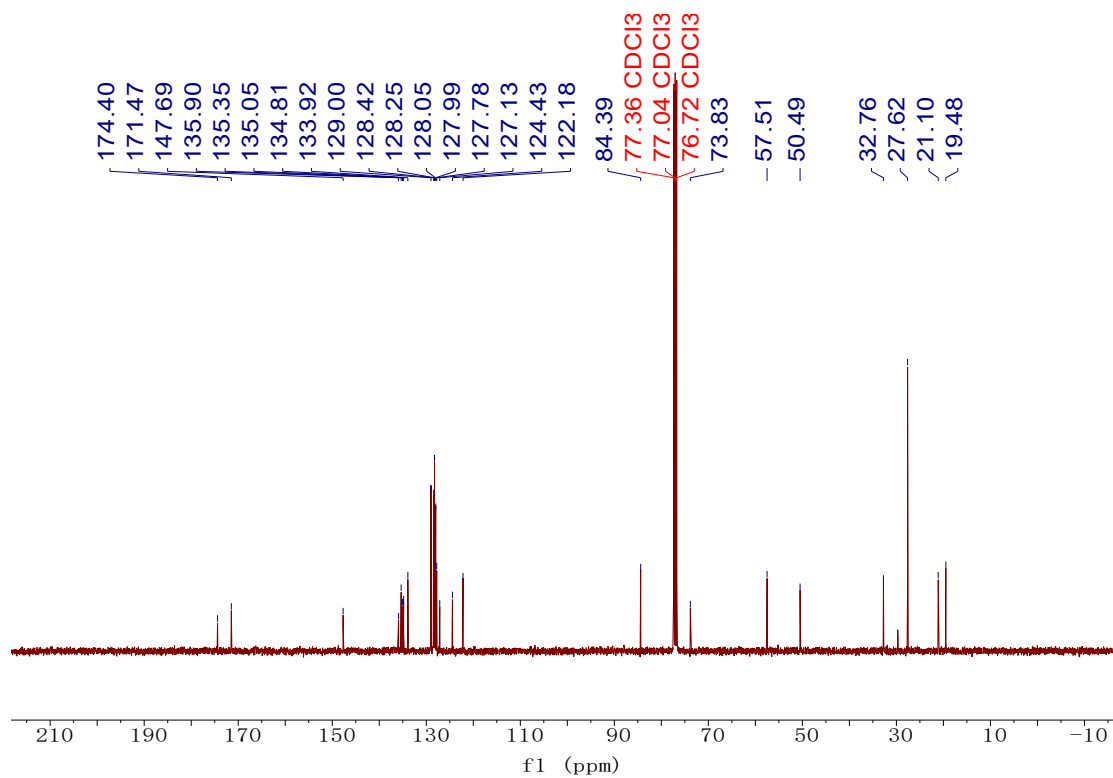

**tert-butyl(3R,4'R)-2'-(4-bromobenzyl)-2,6'-dioxo-4'-phenylspiro[indoline-3,3'-[1,2]oxazinane]-1-carboxylate (3k)**

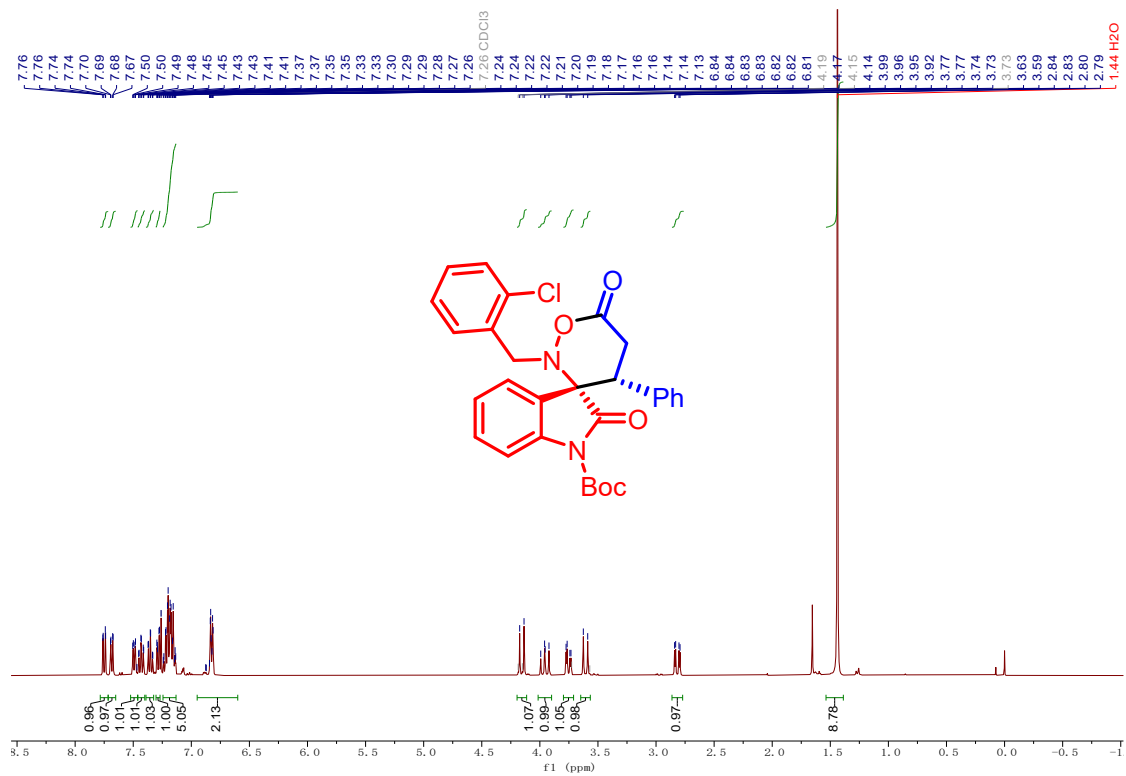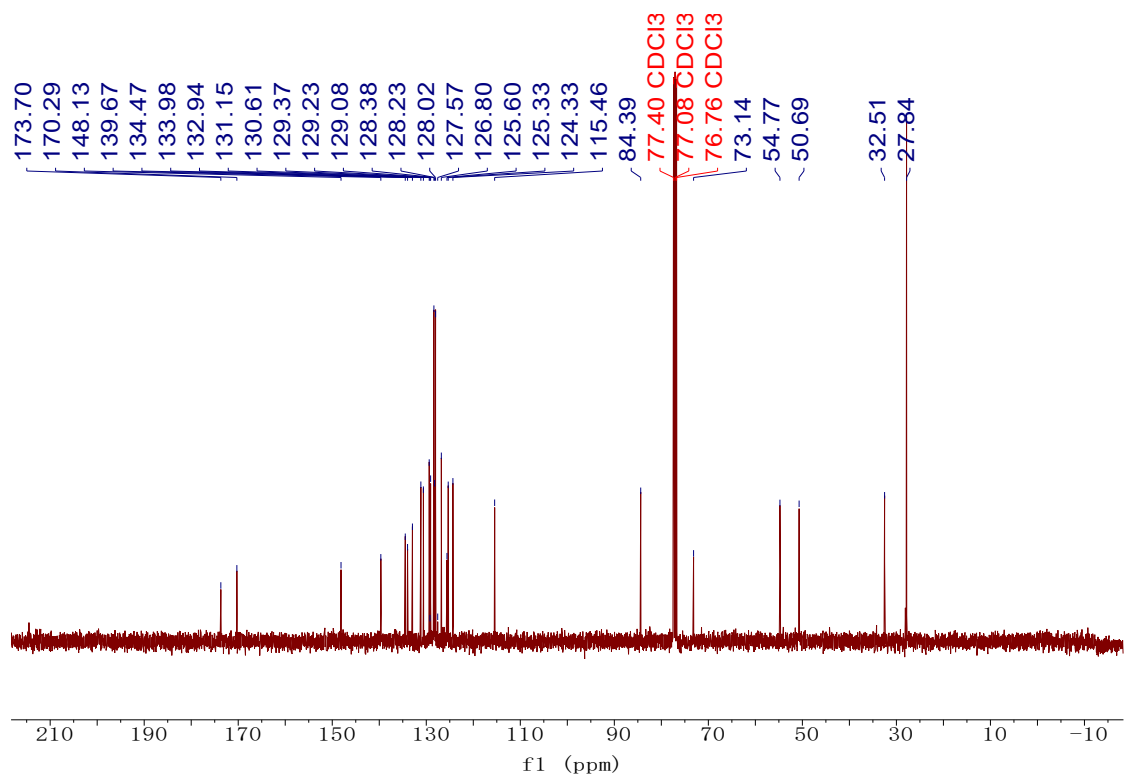

tert-butyl(3R,4'R)-2'-(3-chlorobenzyl)-2,6'-dioxo-4'-phenylspiro[indoline-3,3'-[1,2]oxazinane]-1-carboxylate (3I)

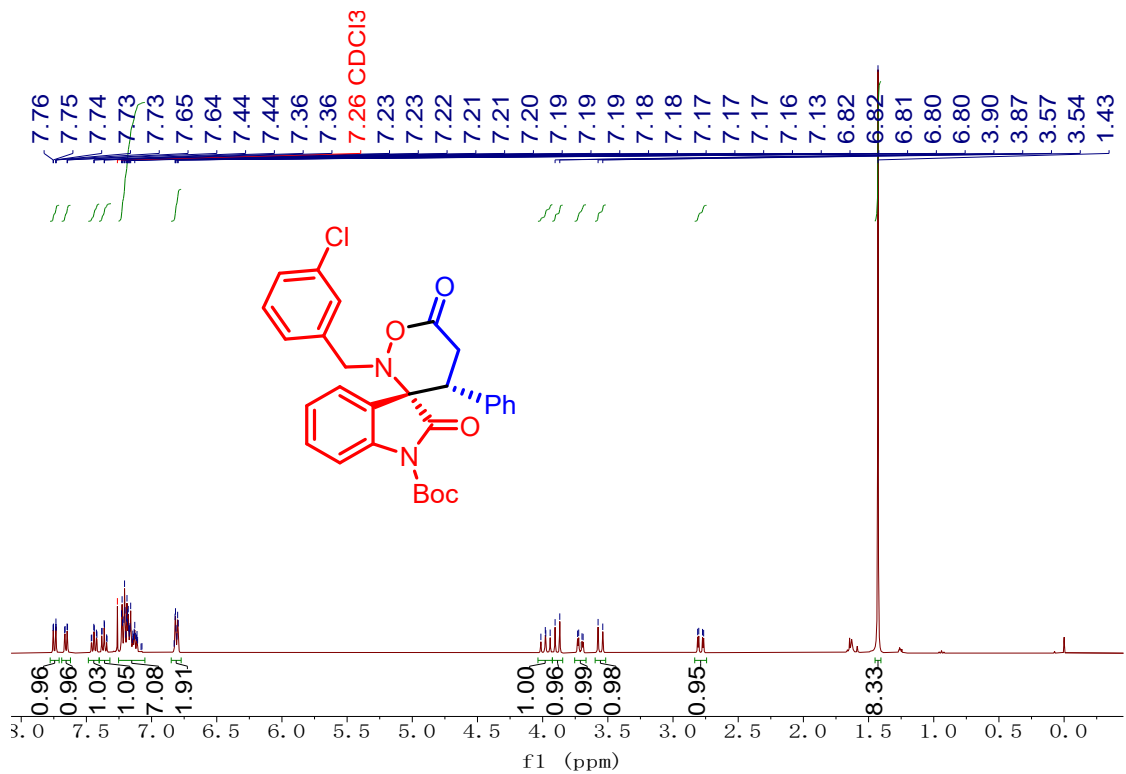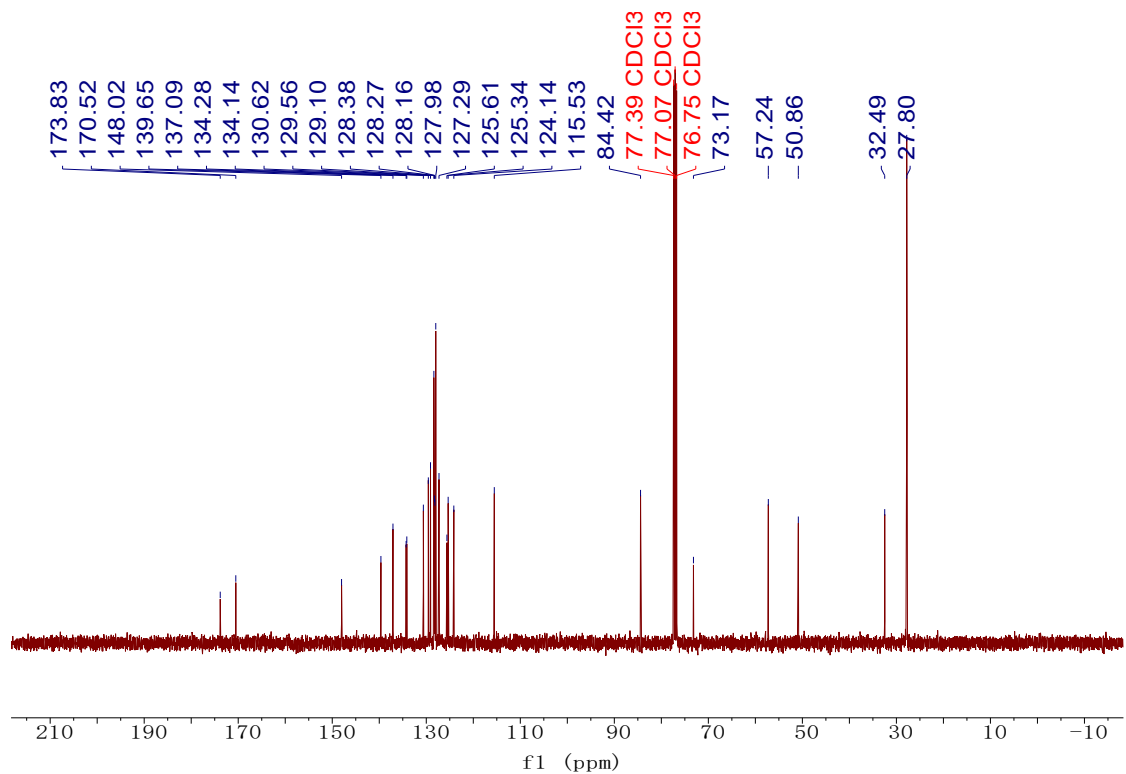

**tert-butyl(3R,4'R)-2'-(4-chlorobenzyl)-2,6'-dioxo-4'-phenylspiro[indoline-3,3'-[1,2]oxazinane]-1-carboxylate(3m)**

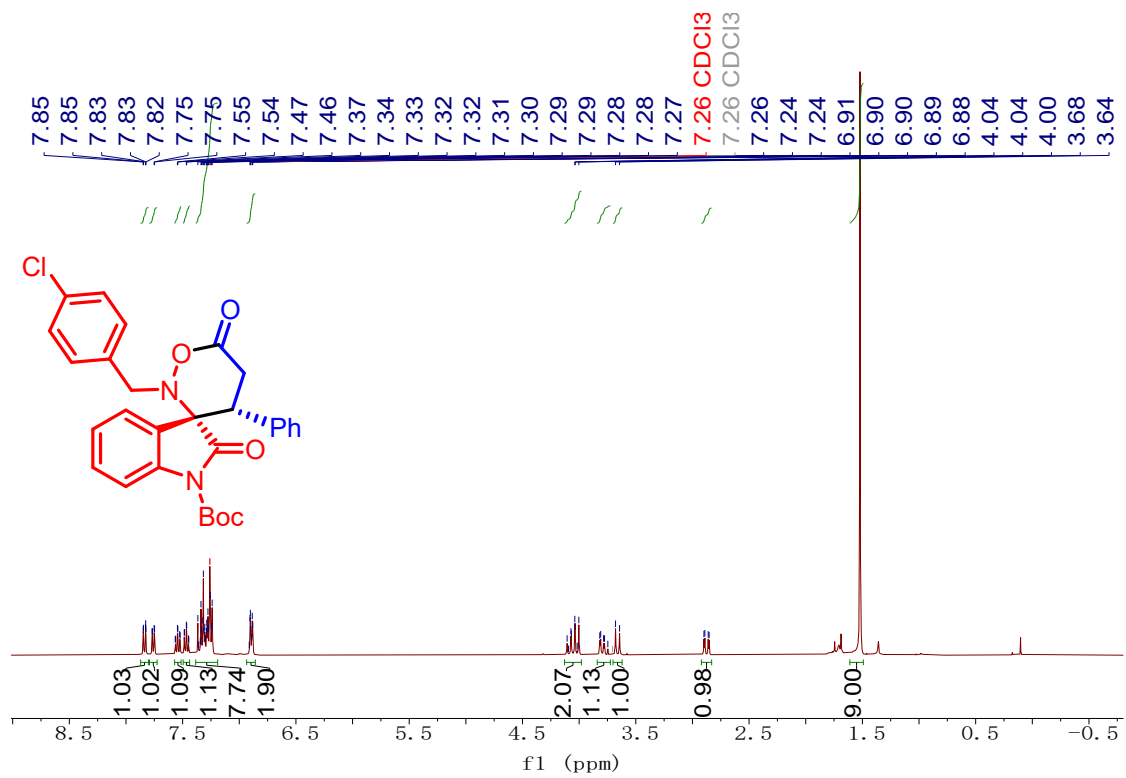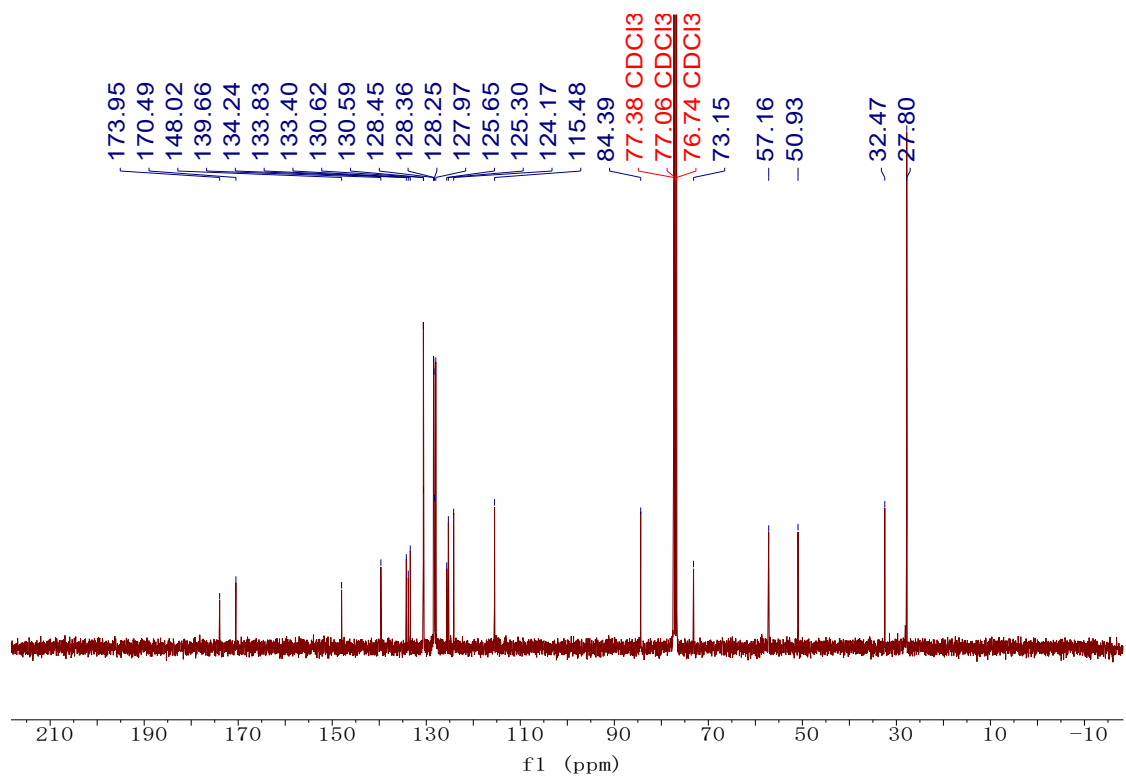

**tert-butyl(3R,4'R)-2,6'-dioxo-4'-phenyl-2'-(3-phenylpropyl)spiro[indoline-3,3'-[1,2]oxazinane]-1-carboxylate (3n)**

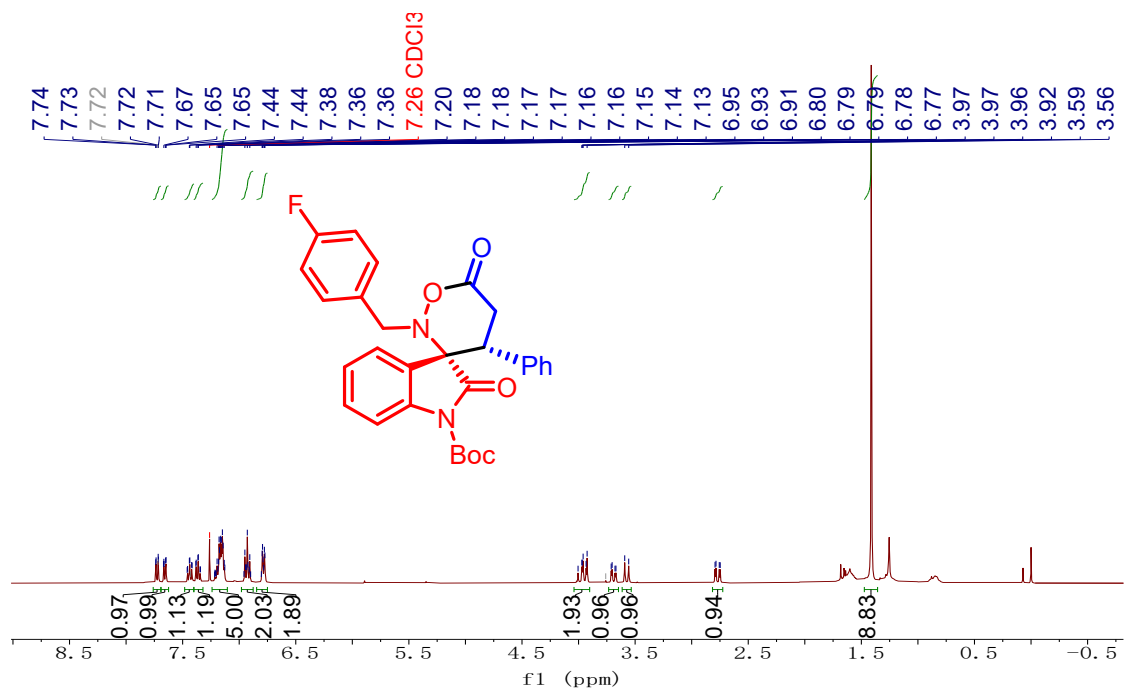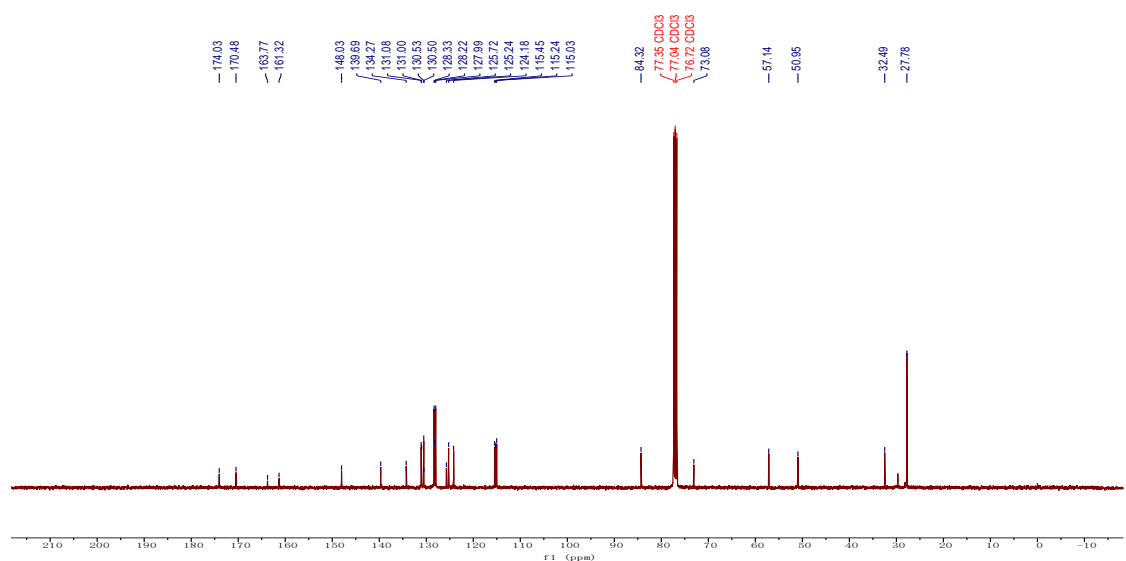

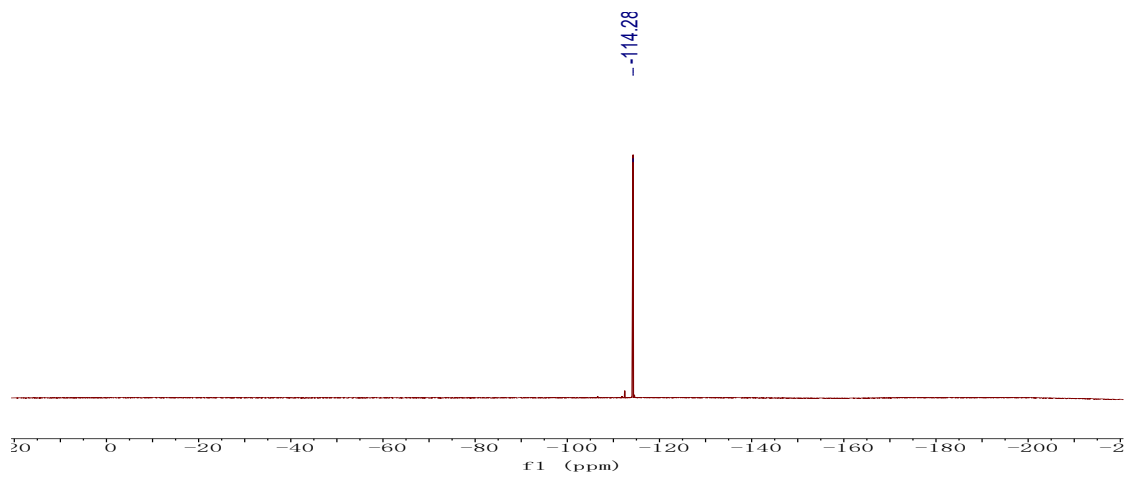

**tert-butyl(3R,4'R)-2'-(2-chlorobenzyl)-2,6'-dioxo-4'-phenylspiro[indoline-3,3'-[1,2]oxazinane]-1-carboxylate (30)**

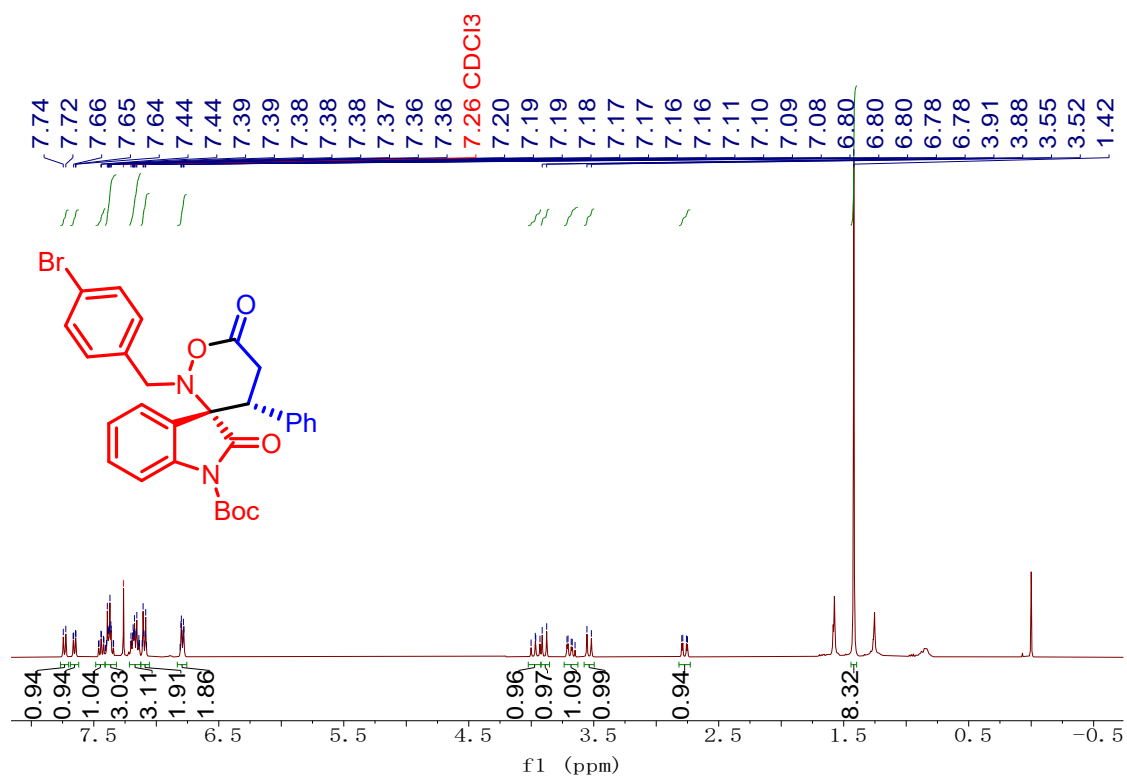

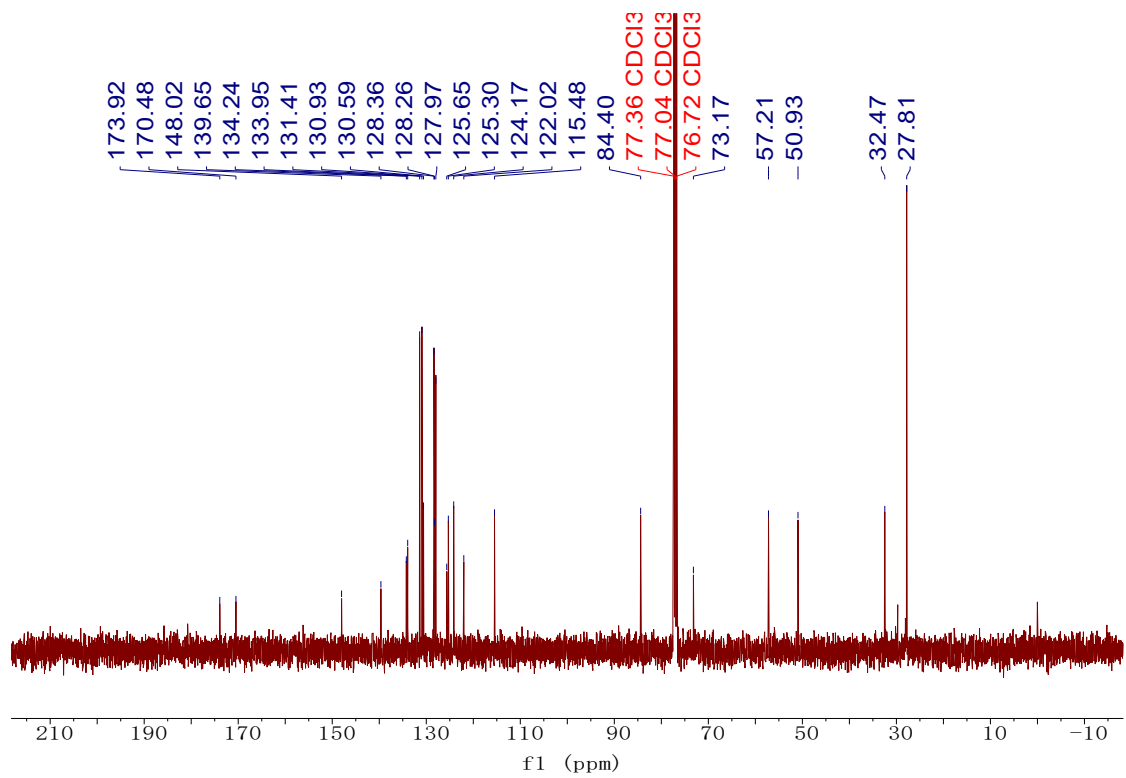

tert-butyl(3R,4'R)-2'-(4-methylbenzyl)-2,6'-dioxo-4'-phenylspiro[indoline-3,3'-[1,2]oxazinane]-1-carboxylate(3p)

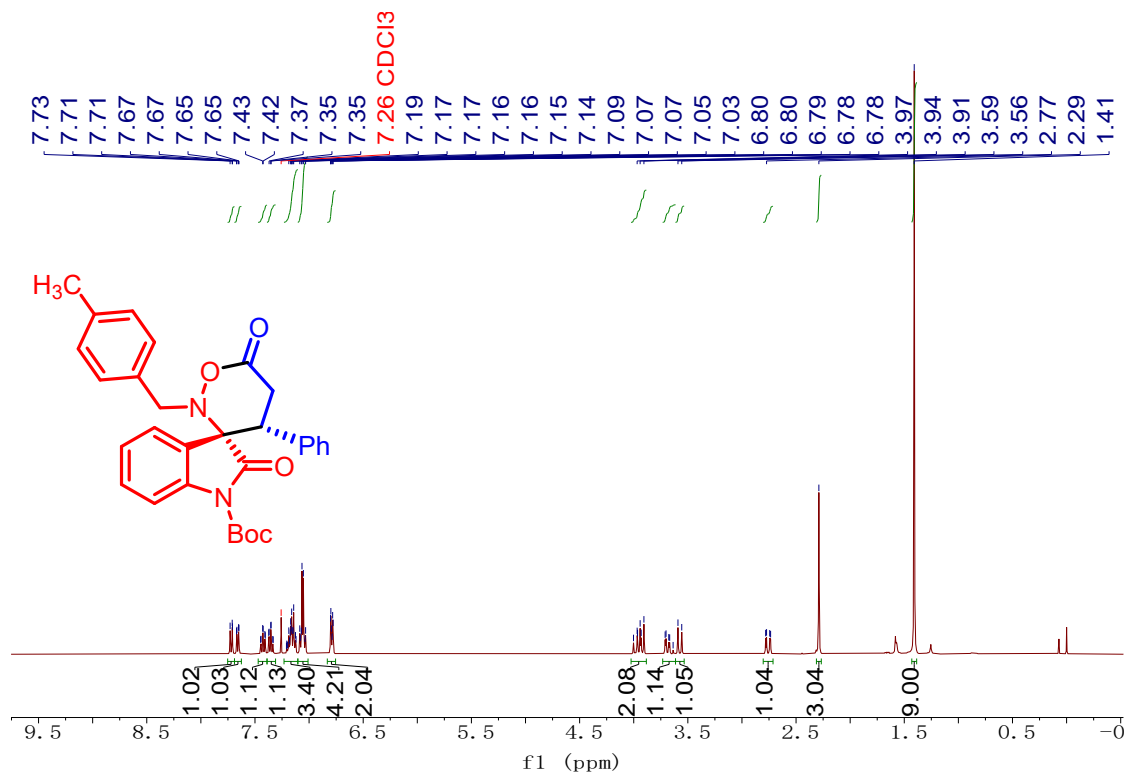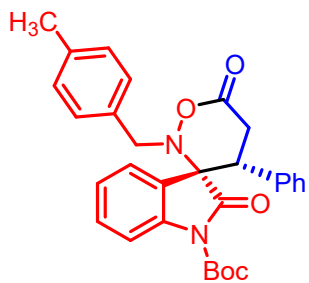

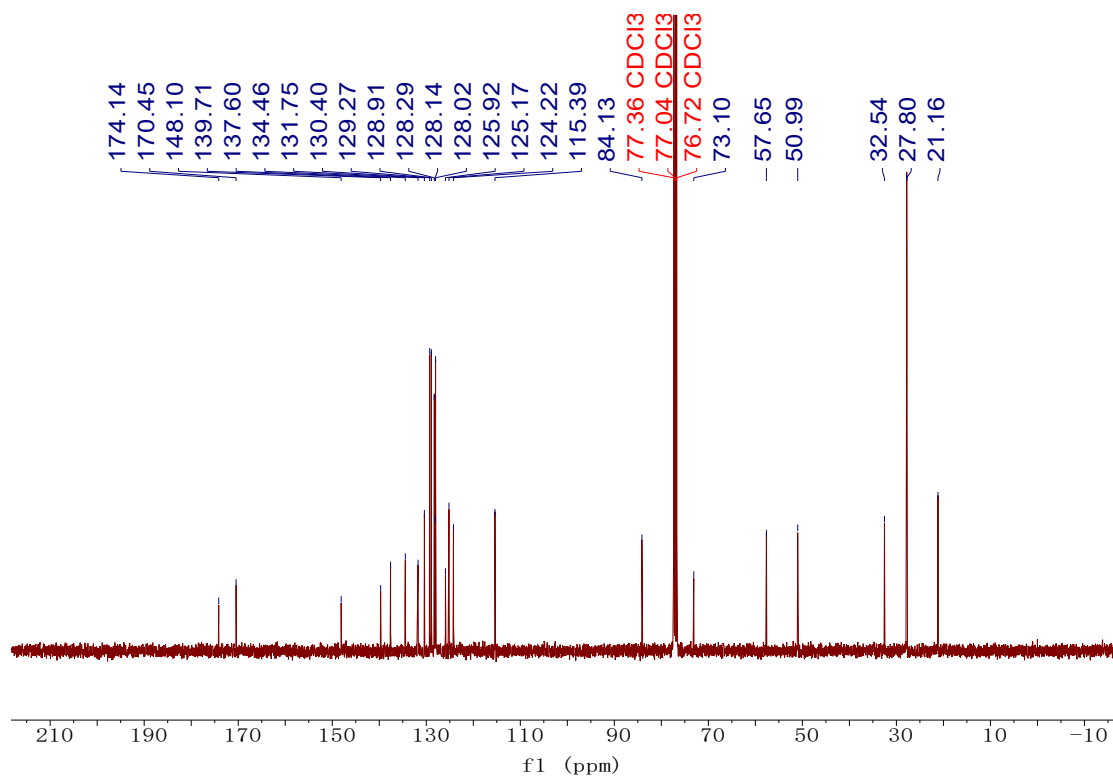

**tert-butyl(3R,4'R)-2'-(4-methoxybenzyl)-2,6'-dioxo-4'-phenylspiro[indoline-3,3'-[1,2]oxazinane]-1-carboxylate(3q)**

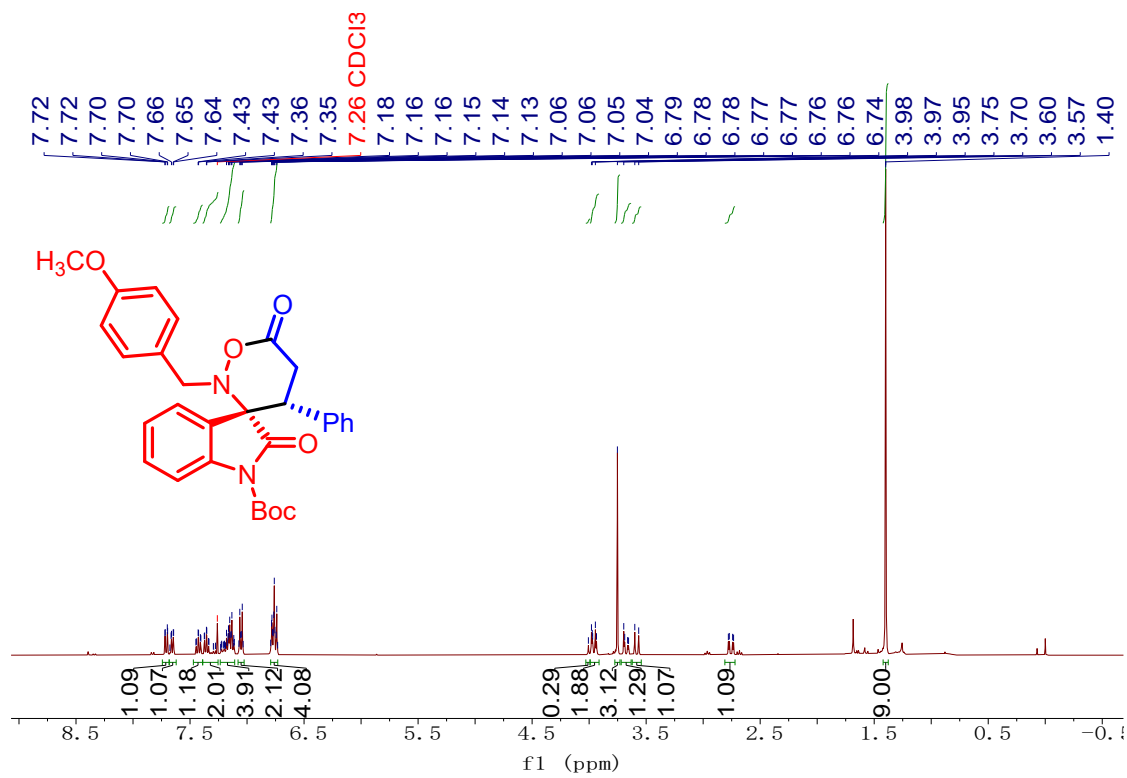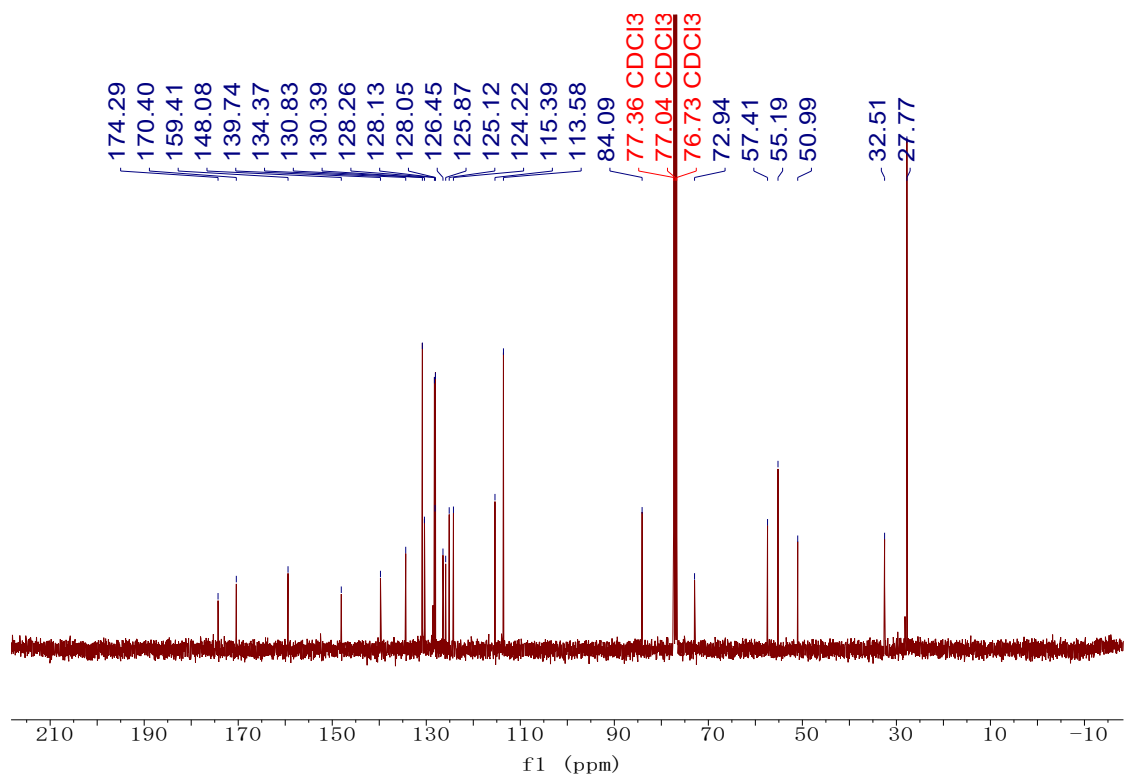

**tert-butyl(3R,4'R)-2'-(naphthalen-1-ylmethyl)-2,6'-dioxo-4'-phenylspiro[indoline-3,3'-[1,2]oxazinane]-1-carboxylate (3r)**

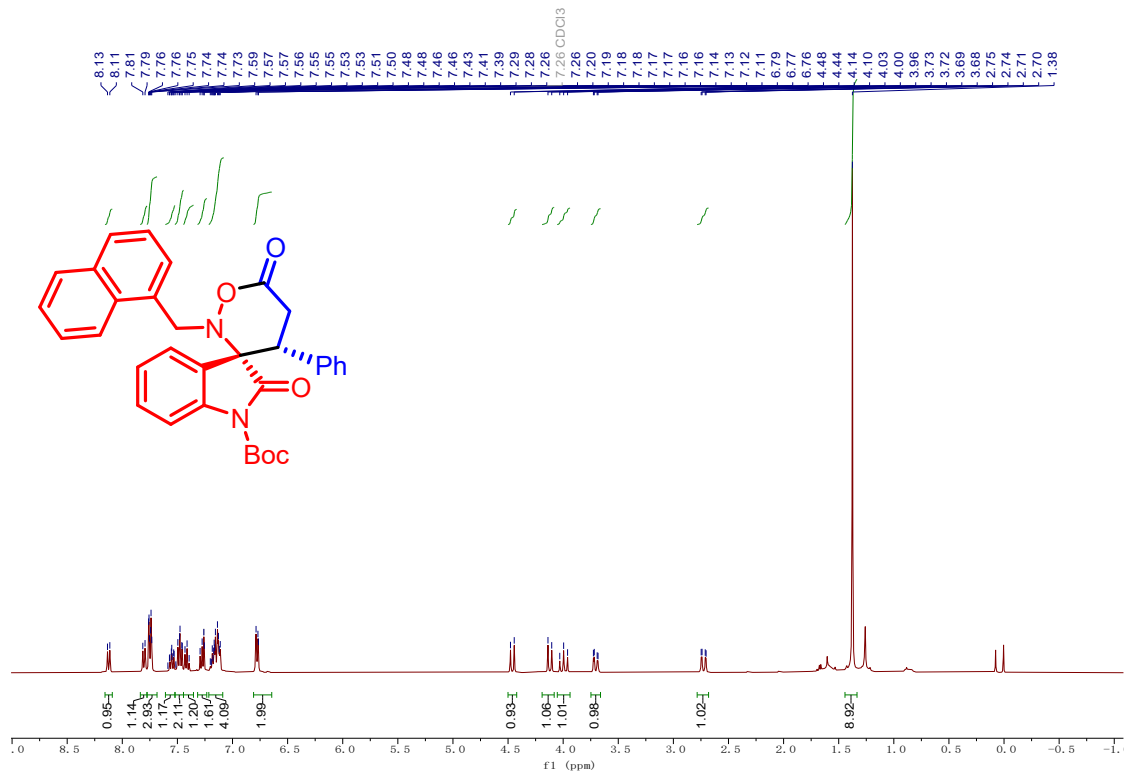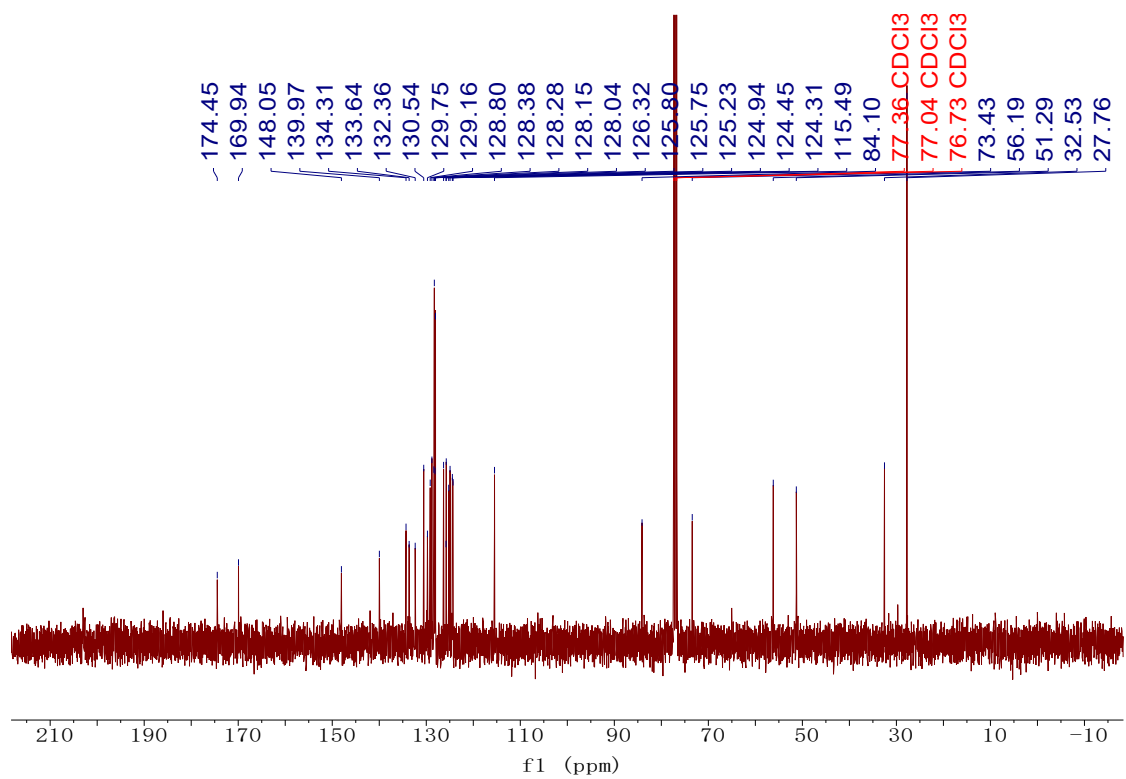

**tert-butyl(3R,4'R)-2,6'-dioxo-2'-phenethyl-4'-phenylspiro[indoline-3,3'-[1,2]oxazinane]-1-carboxylate (3s)**

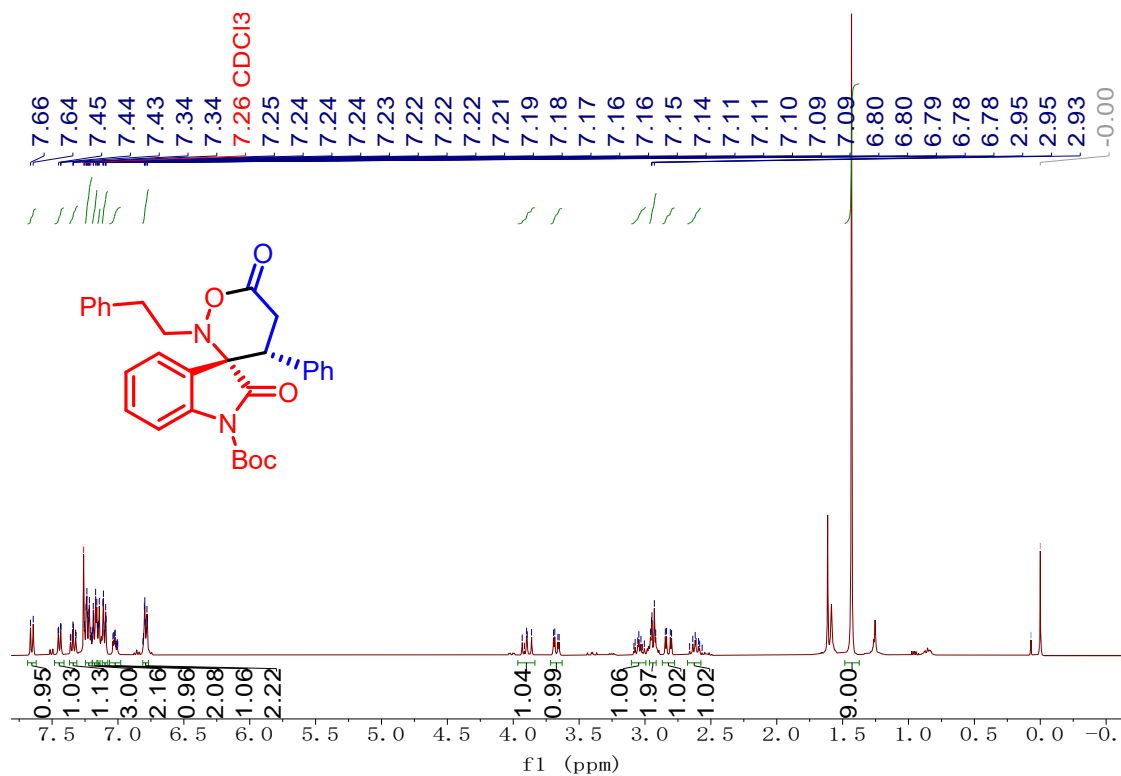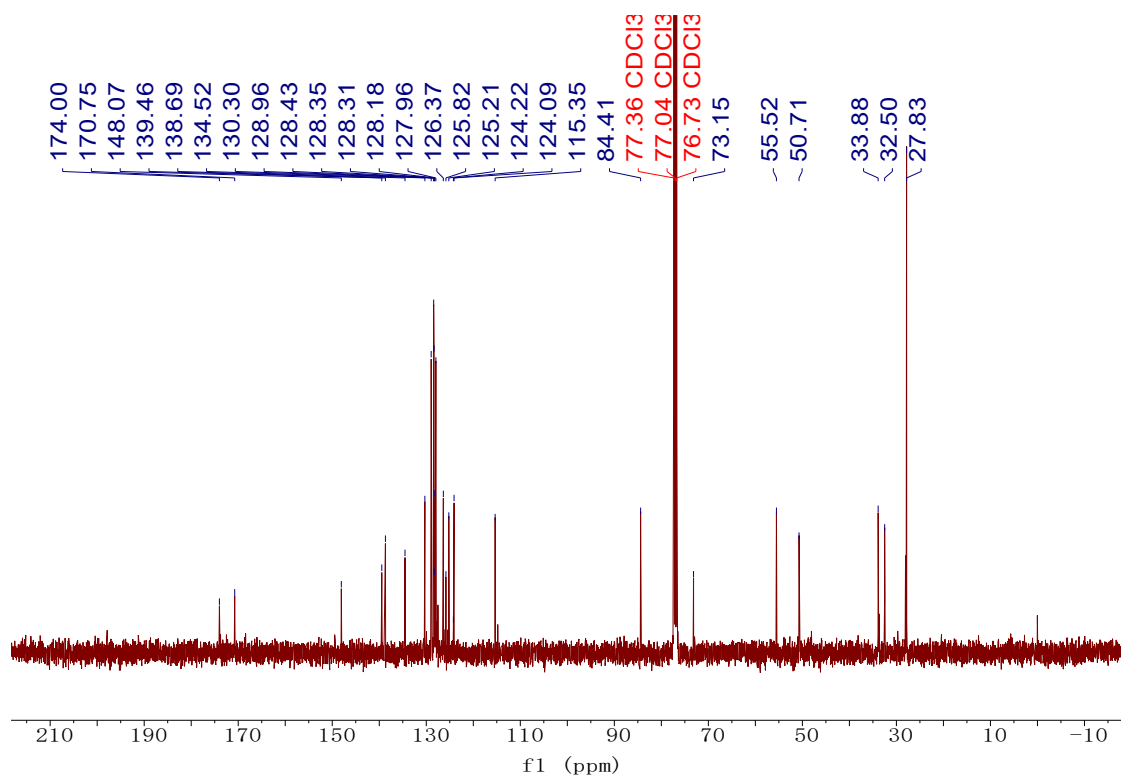

**tert-butyl(3R,4'R)-2,6'-dioxo-4'-phenyl-2'-(3-phenylpropyl)spiro[indoline-3,3'-[1,2]oxazinane]-1-carboxylate(3t)**

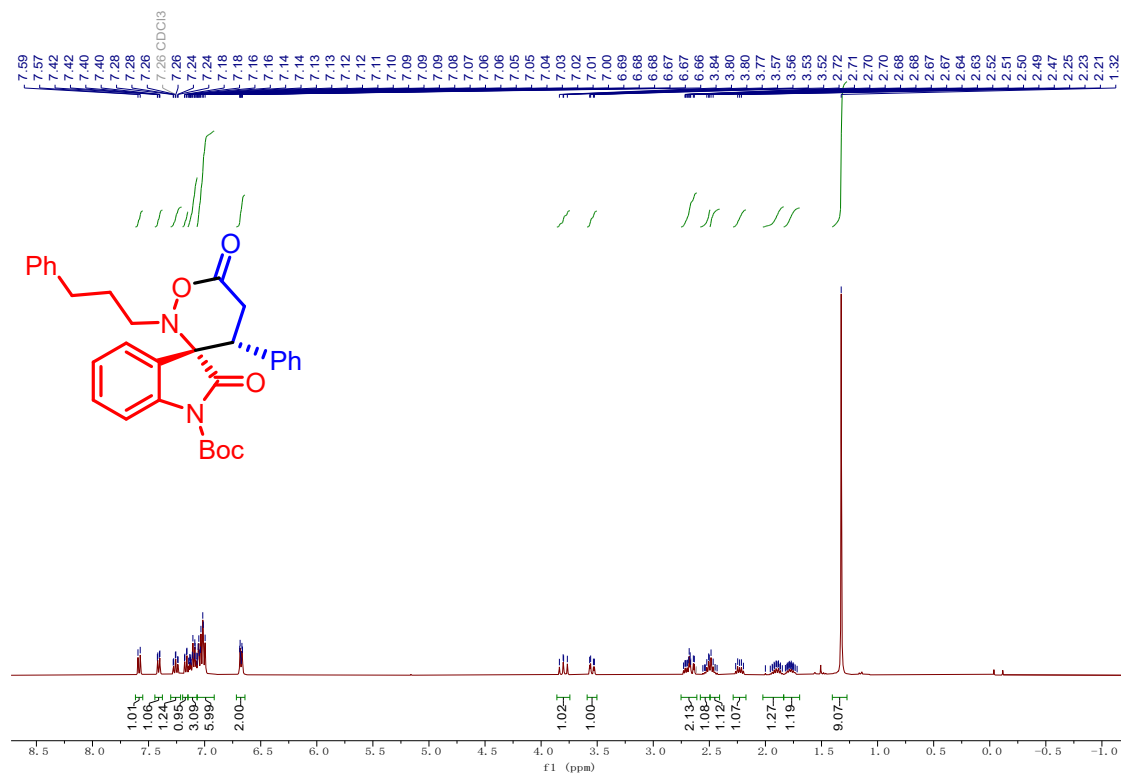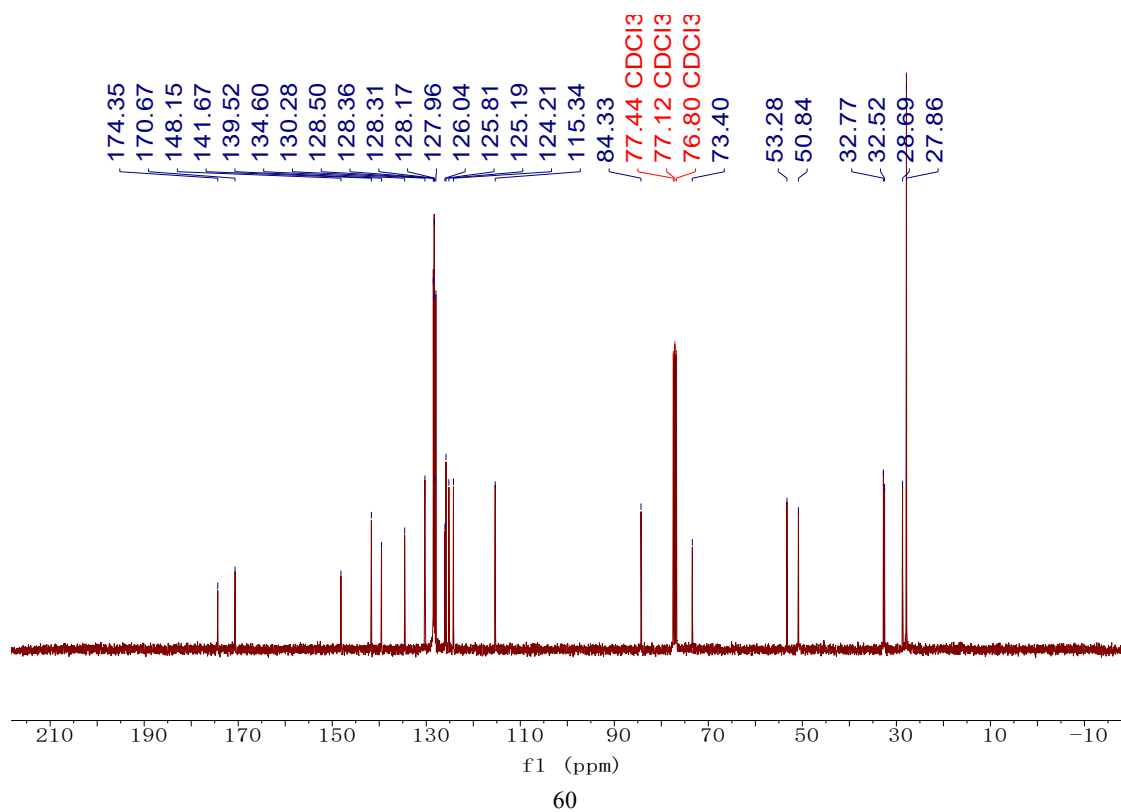

**tert-butyl(3R,4'R)-2'-(4-fluorobenzyl)-2,6'-dioxo-4'-phenylspiro[indoline-3,3'-[1,2]oxazinane]-1-carboxylate (3u)**

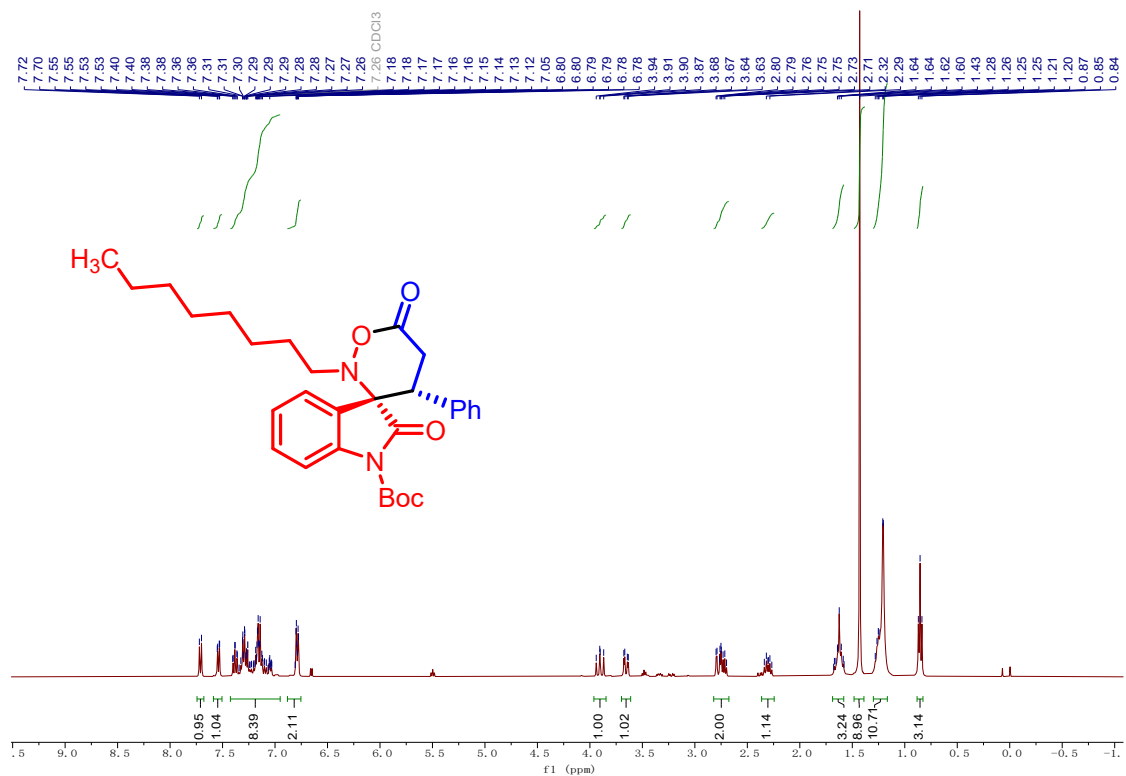

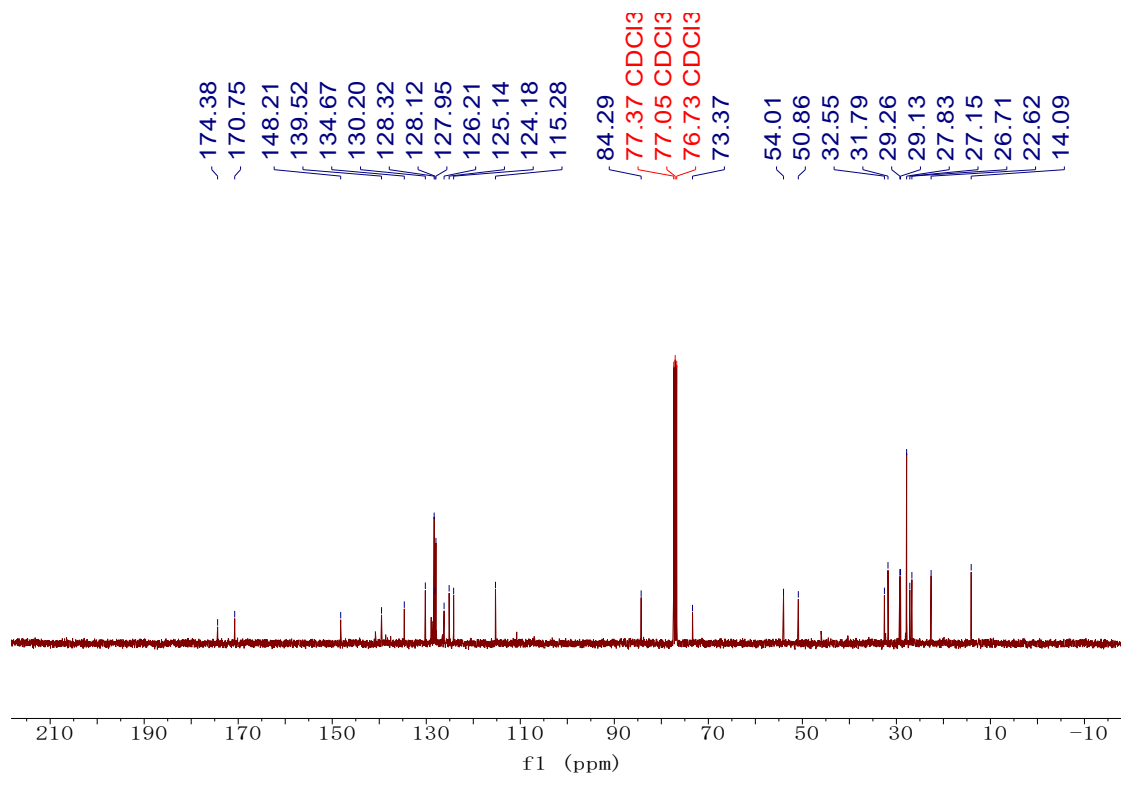

**tert-butyl(3R,4'R)-2'-benzyl-2,6'-dioxo-4'-(p-tolyl)spiro[indoline-3,3'-[1,2]oxazinane]-1-carboxylate (3v)**

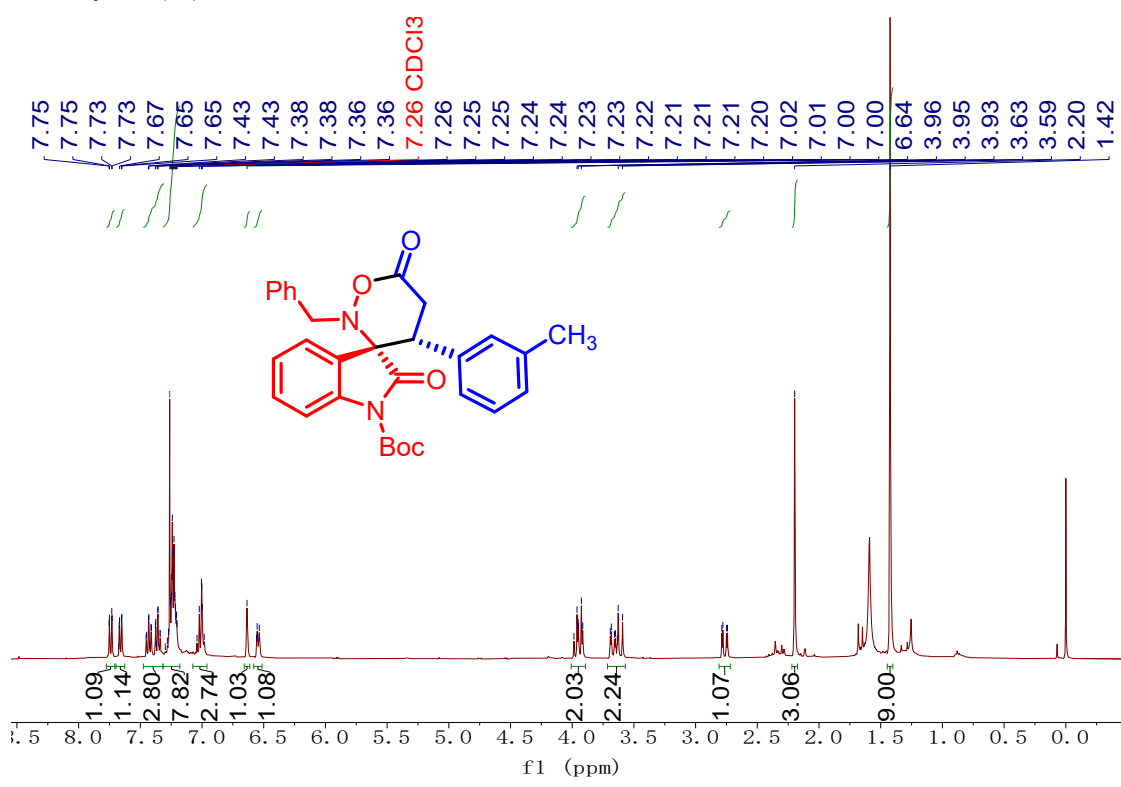

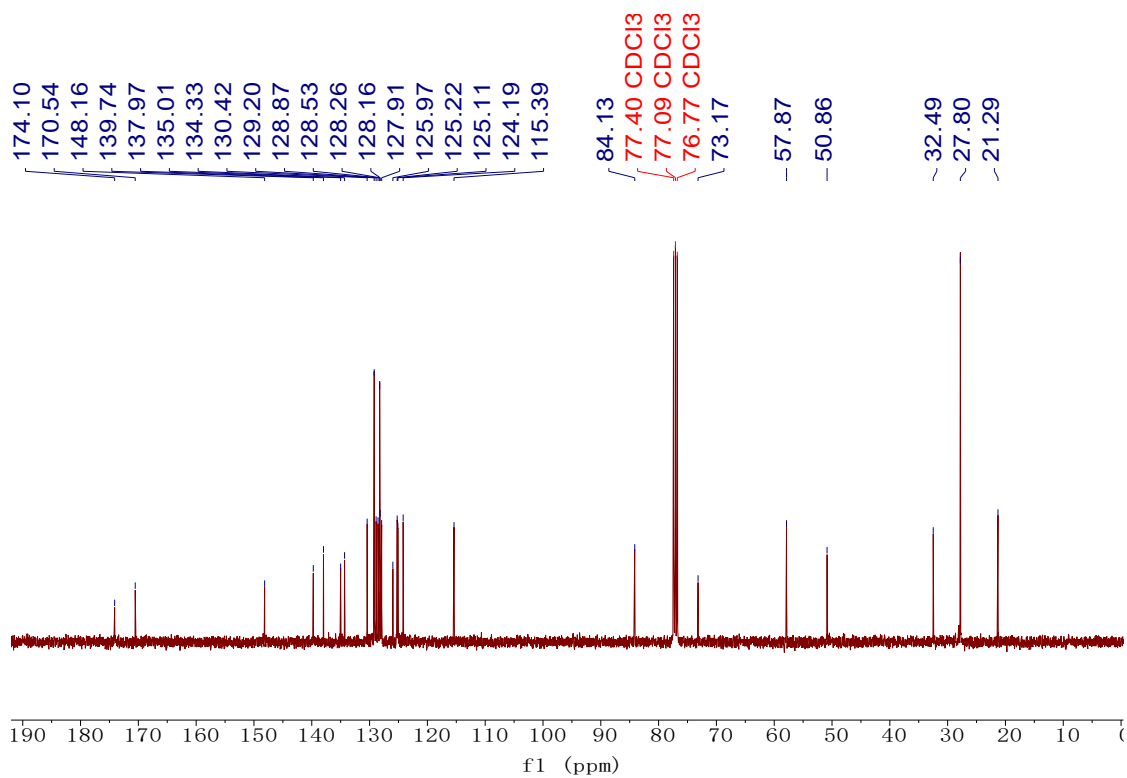

tert-butyl (3R,4'R)-2'-benzyl-4'-(3-methoxyphenyl)-2,6'-dioxospiro[indoline-3,3'-[1,2]oxazinane]-1-carboxylate (3w):

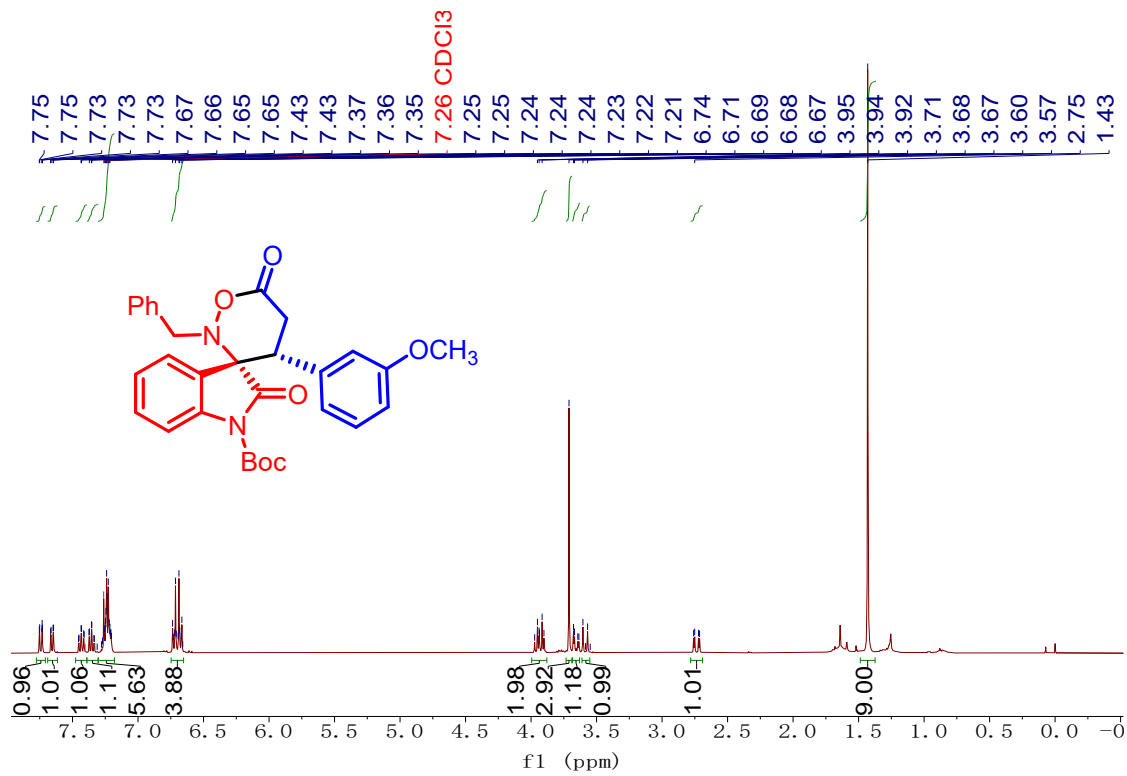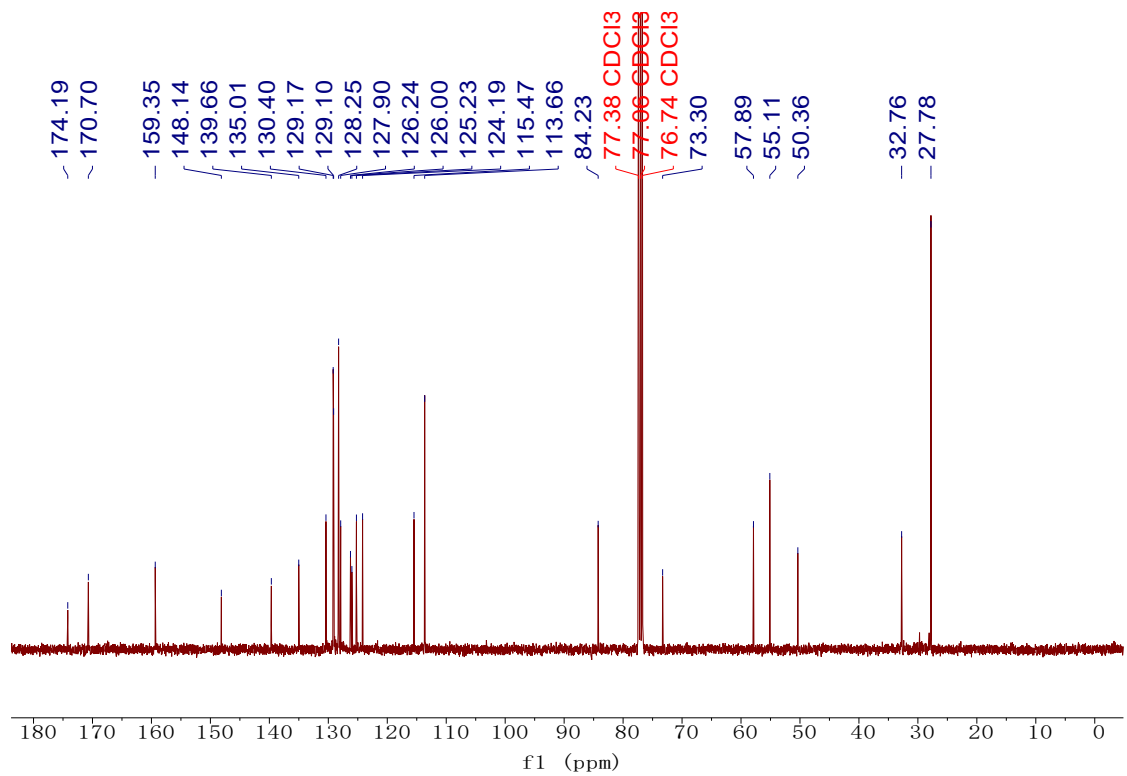

**tert-butyl(3R,4'R)-2'-benzyl-2,6'-dioxo-4'-phenylspiro[indoline-3,3'-[1,2]oxazinane]-1-carboxylate(3x)**

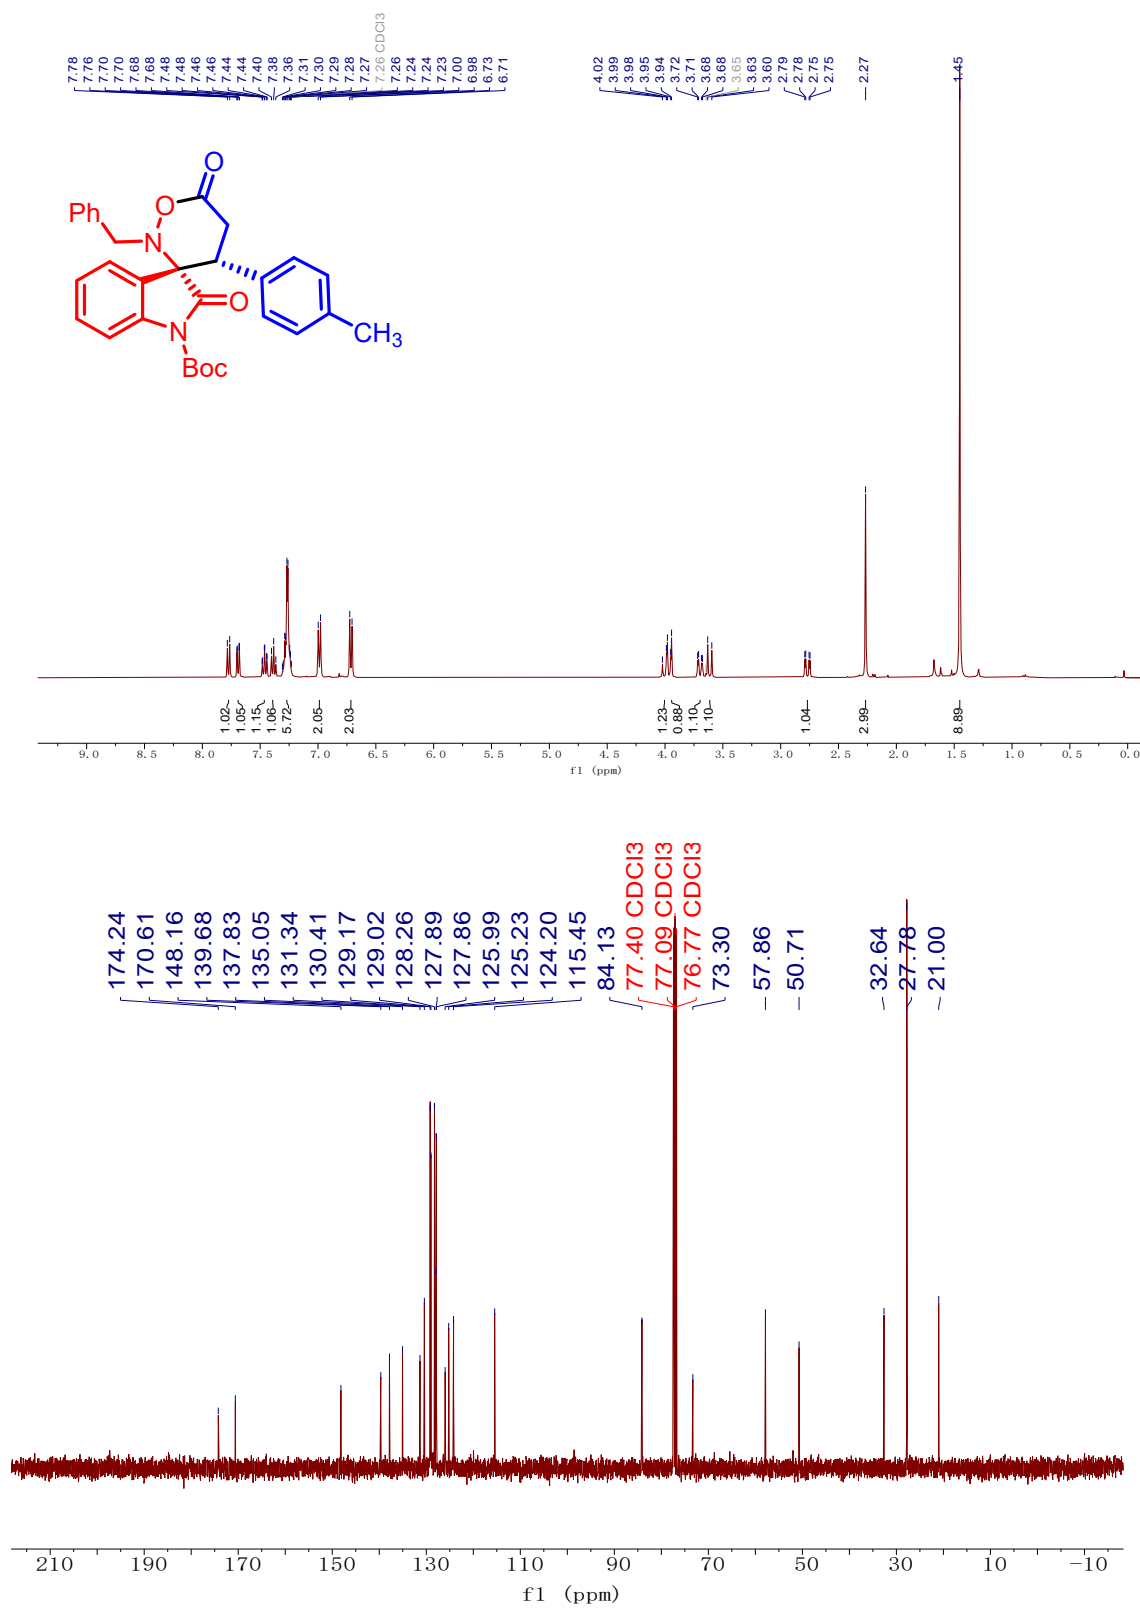

**tert-butyl (3R,4'R)-2'-benzyl-4'-(4-methoxyphenyl)-2,6'-dioxospiro[indoline-3,3'-[1,2]oxazinane]-1-carboxylate (3y):**

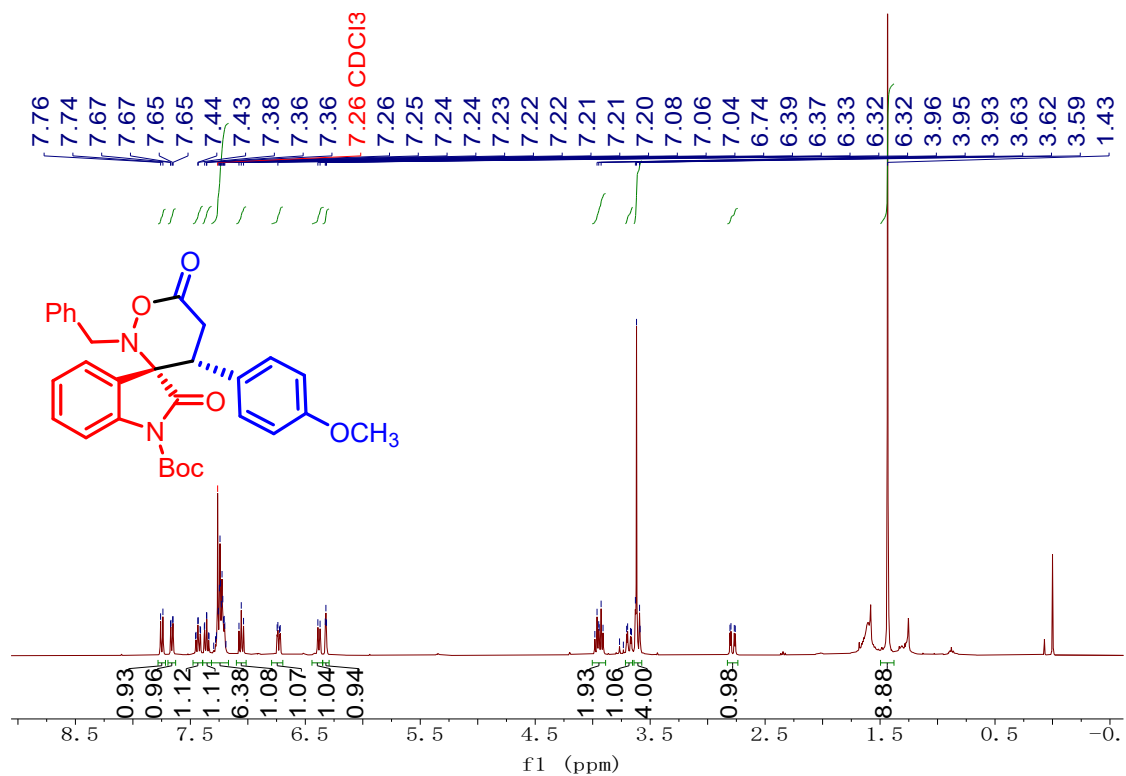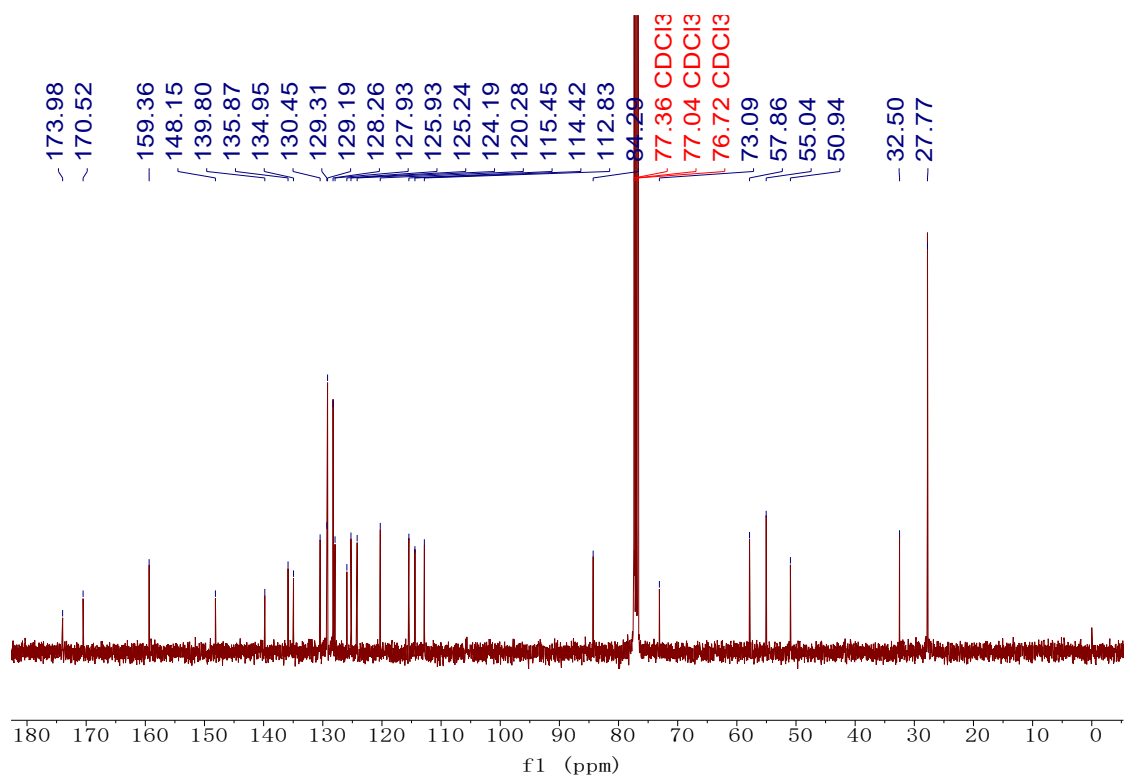

**tert-butyl(R)-3-(benzyl(hydroxy)amino)-3-((R)-3-methoxy-3-oxo-1-phenylpropyl)-2-oxindoline-1-carboxylate (4)**

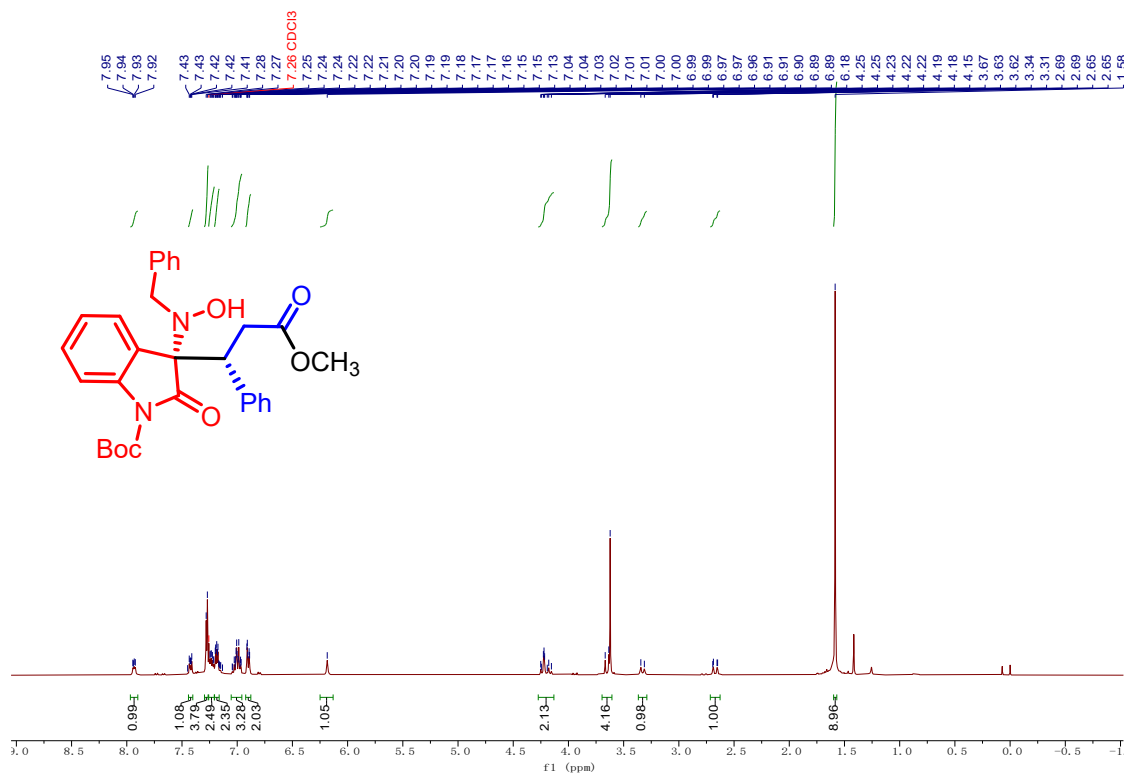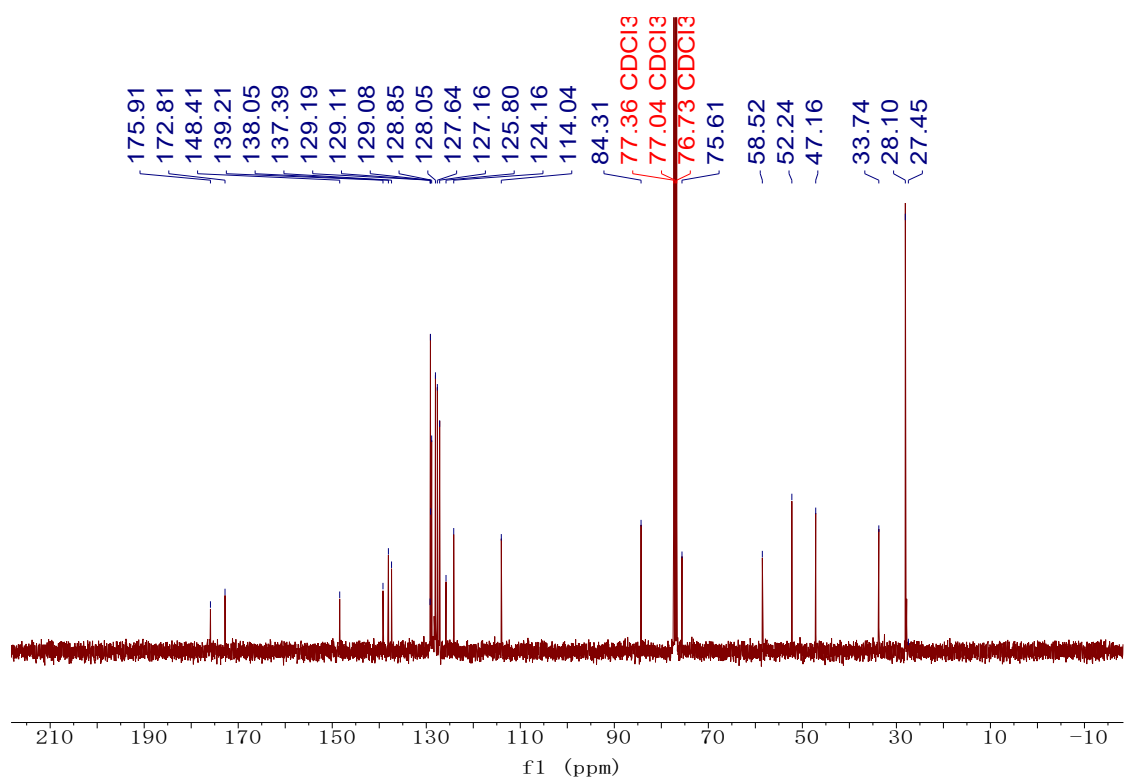



### HPLC spectra of product 3a.

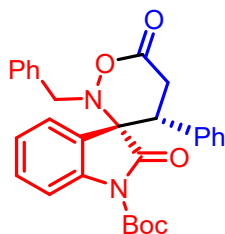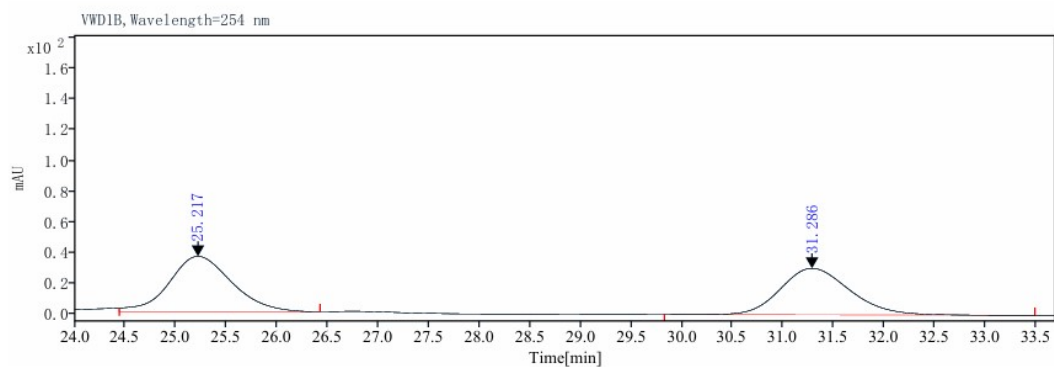

VWD1B, Wavelength=254 nm

| Ret. Time | Area    | Height | Area%  |
|-----------|---------|--------|--------|
| 25.217    | 1556.92 | 36.08  | 51.98  |
| 31.286    | 1438.47 | 30.19  | 48.02  |
| Total     | 2995.39 | 66.27  | 100.00 |

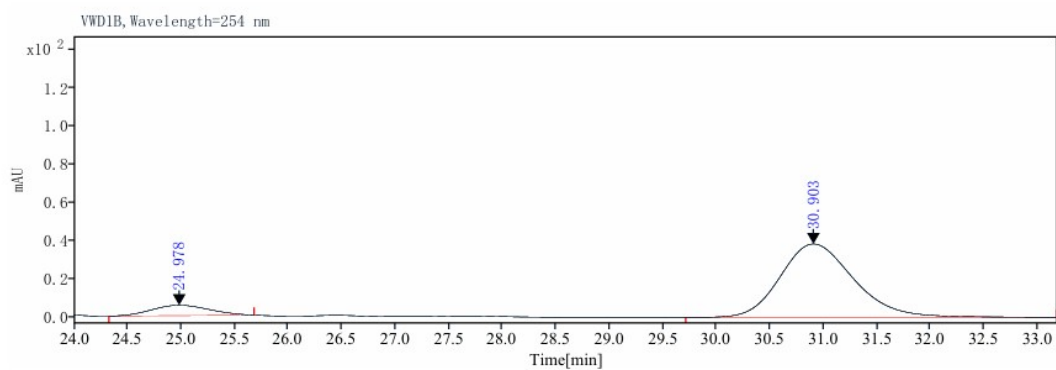

VWD1B, Wavelength=254 nm

| Ret. Time | Area    | Height | Area%  |
|-----------|---------|--------|--------|
| 24.978    | 203.62  | 5.44   | 10.04  |
| 30.903    | 1824.28 | 38.35  | 89.96  |
| Total     | 2027.89 | 43.79  | 100.00 |

### HPLC spectra of product 3b.

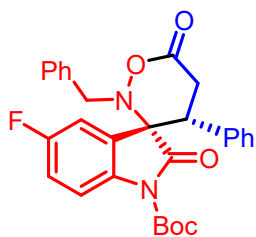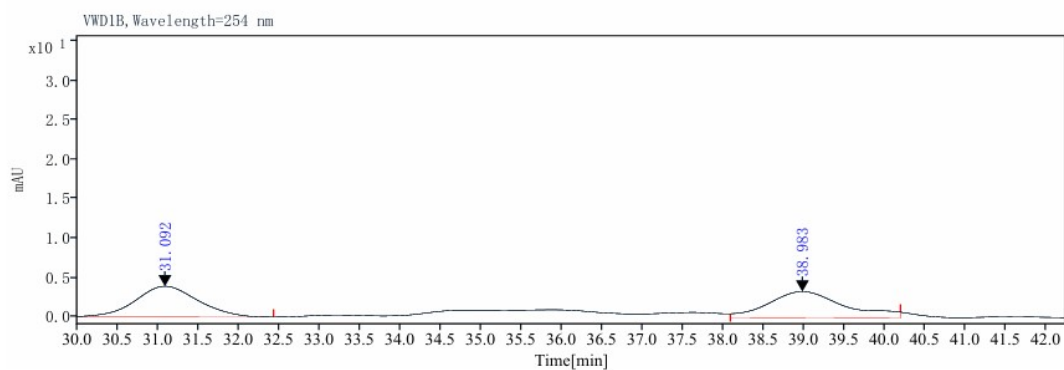

VWD1B, Wavelength=254 nm

| Ret. Time | Area   | Height | Area%  |
|-----------|--------|--------|--------|
| 31.092    | 212.06 | 3.91   | 49.51  |
| 38.983    | 216.28 | 3.31   | 50.49  |
| Total     | 428.34 | 7.22   | 100.00 |

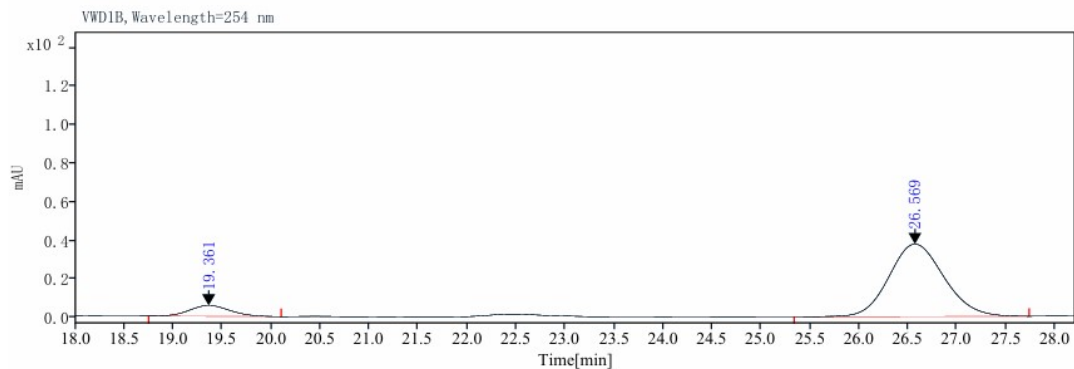

VWD1B, Wavelength=254 nm

| Ret. Time | Area    | Height | Area%  |
|-----------|---------|--------|--------|
| 19.361    | 161.01  | 5.60   | 9.86   |
| 26.569    | 1471.57 | 37.65  | 90.14  |
| Total     | 1632.58 | 43.26  | 100.00 |

HPLC spectra of product 3c.

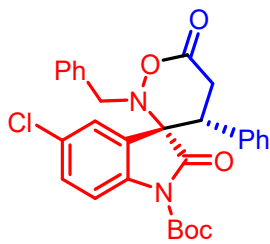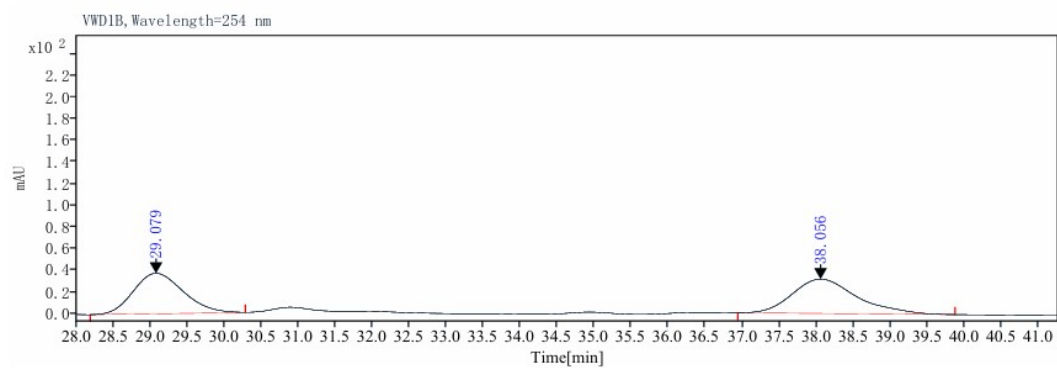

VWD1B, Wavelength=254 nm

| Ret. Time | Area    | Height | Area%  |
|-----------|---------|--------|--------|
| 29.079    | 1752.69 | 37.40  | 47.73  |
| 38.056    | 1919.17 | 31.72  | 52.27  |
| Total     | 3671.86 | 69.11  | 100.00 |

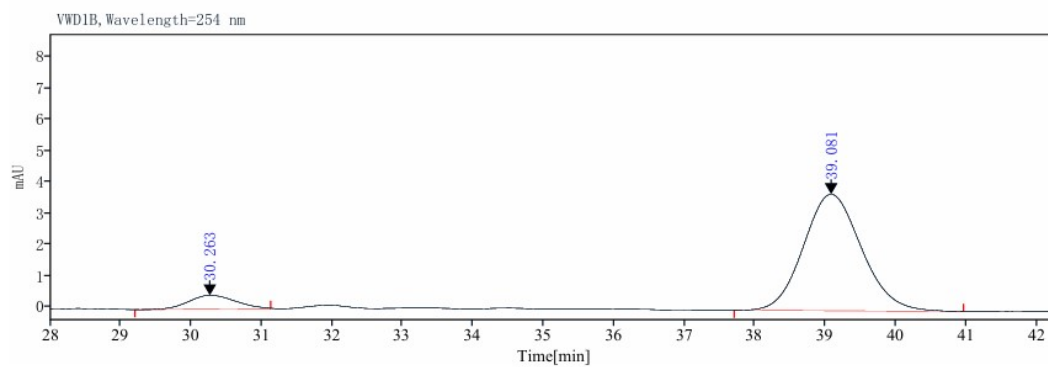

VWD1B, Wavelength=254 nm

| Ret. Time | Area   | Height | Area%  |
|-----------|--------|--------|--------|
| 30.263    | 20.86  | 0.45   | 8.89   |
| 39.081    | 213.69 | 3.73   | 91.11  |
| Total     | 234.54 | 4.18   | 100.00 |

**HPLC spectra of product 3d.**

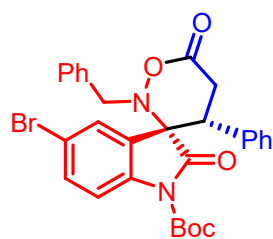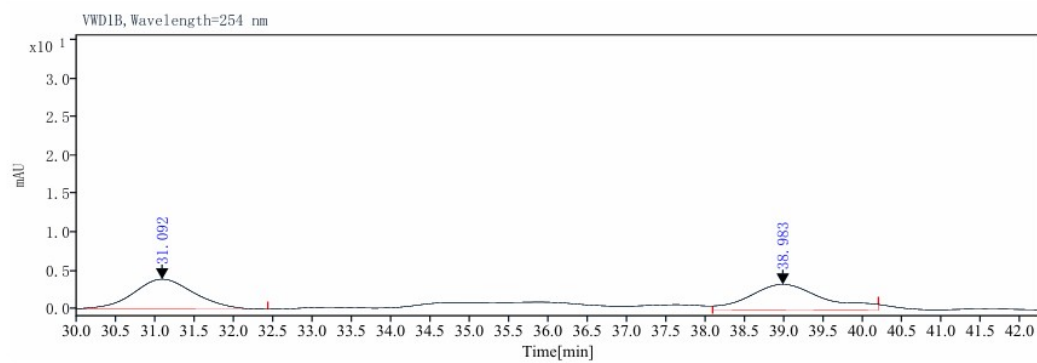

VWD1B, Wavelength=254 nm

| Ret. Time | Area   | Height | Area%  |
|-----------|--------|--------|--------|
| 31.092    | 212.06 | 3.91   | 49.51  |
| 38.983    | 216.28 | 3.31   | 50.49  |
| Total     | 428.34 | 7.22   | 100.00 |

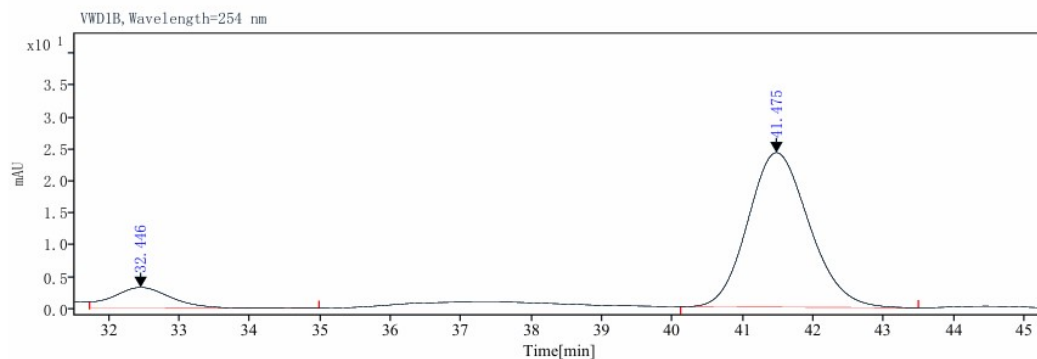

VWD1B, Wavelength=254 nm

| Ret. Time | Area    | Height | Area%  |
|-----------|---------|--------|--------|
| 32.446    | 191.53  | 3.27   | 11.59  |
| 41.475    | 1460.61 | 24.14  | 88.41  |
| Total     | 1652.14 | 27.41  | 100.00 |

HPLC spectra of product 3e.

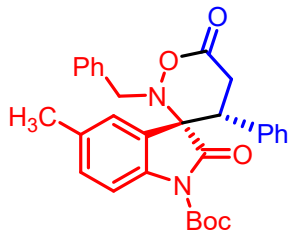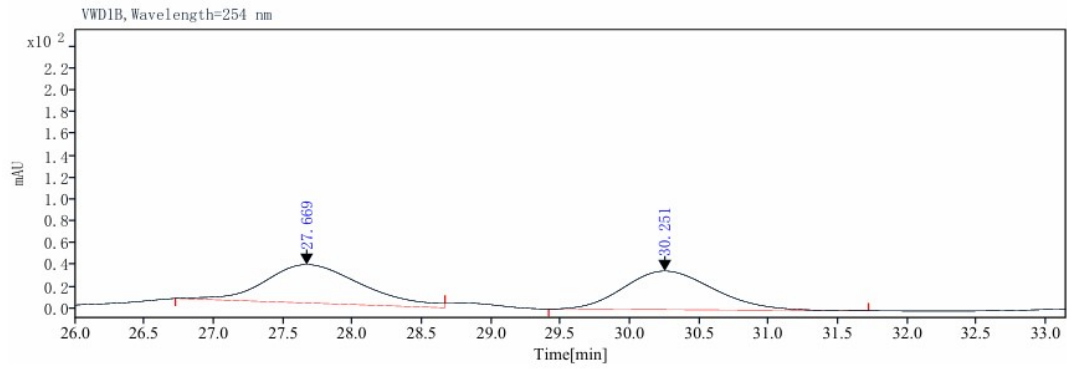

VWD1B, Wavelength=254 nm

| Ret. Time | Area    | Height | Area%  |
|-----------|---------|--------|--------|
| 27.669    | 1712.17 | 35.18  | 51.75  |
| 30.251    | 1596.18 | 35.34  | 48.25  |
| Total     | 3308.35 | 70.52  | 100.00 |

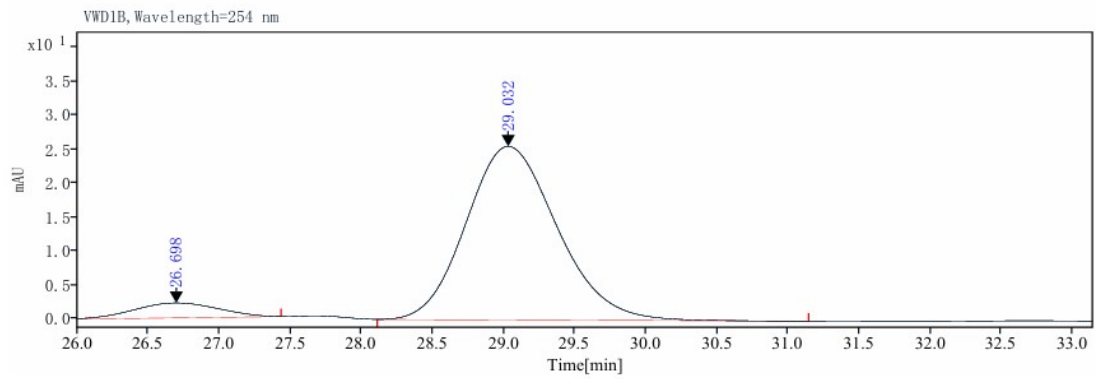

VWD1B, Wavelength=254 nm

| Ret. Time | Area    | Height | Area%  |
|-----------|---------|--------|--------|
| 26.698    | 91.57   | 2.21   | 7.45   |
| 29.032    | 1137.72 | 25.55  | 92.55  |
| Total     | 1229.28 | 27.76  | 100.00 |

HPLC spectra of product 3f.

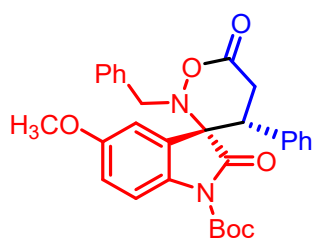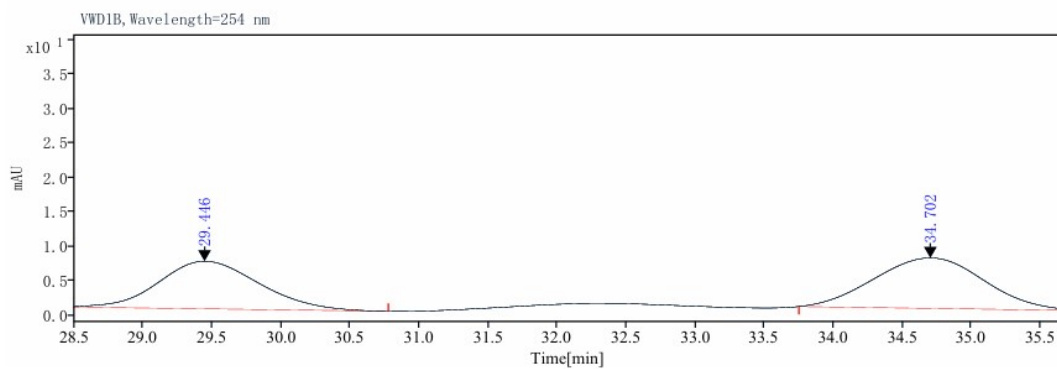

VWD1B, Wavelength=254 nm

| Ret. Time | Area   | Height | Area%  |
|-----------|--------|--------|--------|
| 29.446    | 349.16 | 6.90   | 46.42  |
| 34.702    | 403.05 | 7.32   | 53.58  |
| Total     | 752.22 | 14.22  | 100.00 |

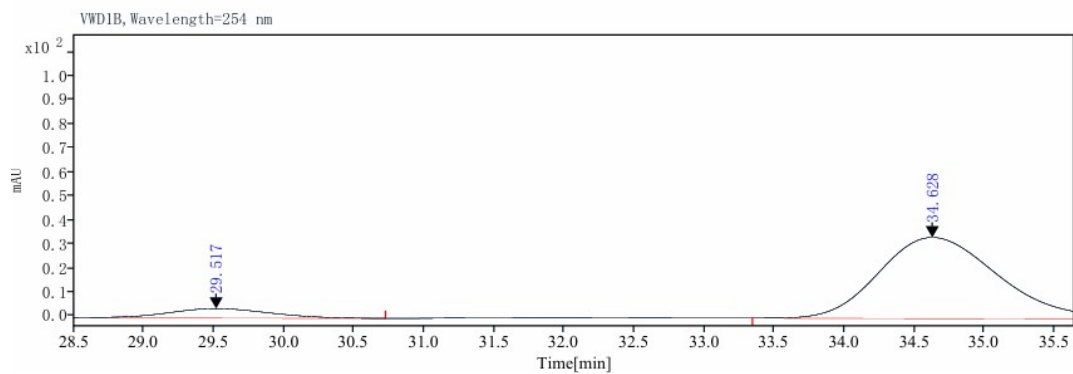

VWD1B, Wavelength=254 nm

| Ret. Time | Area    | Height | Area%  |
|-----------|---------|--------|--------|
| 29.517    | 201.46  | 3.96   | 9.10   |
| 34.628    | 2011.81 | 33.82  | 90.90  |
| Total     | 2213.27 | 37.78  | 100.00 |

HPLC spectra of product 3g.

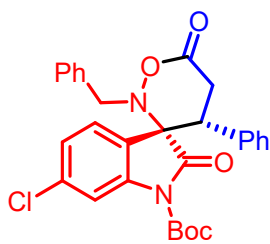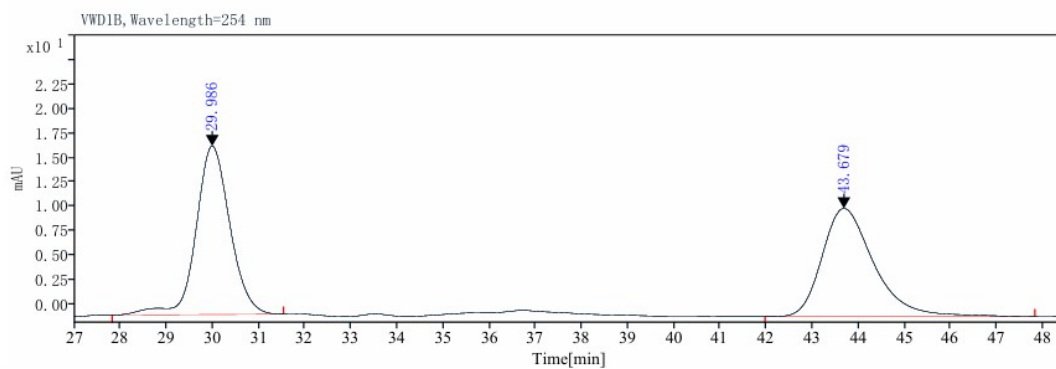

VWD1B, Wavelength=254 nm

| Ret. Time | Area    | Height | Area%  |
|-----------|---------|--------|--------|
| 29.986    | 886.72  | 17.29  | 50.56  |
| 43.679    | 867.03  | 11.11  | 49.44  |
| Total     | 1753.75 | 28.40  | 100.00 |

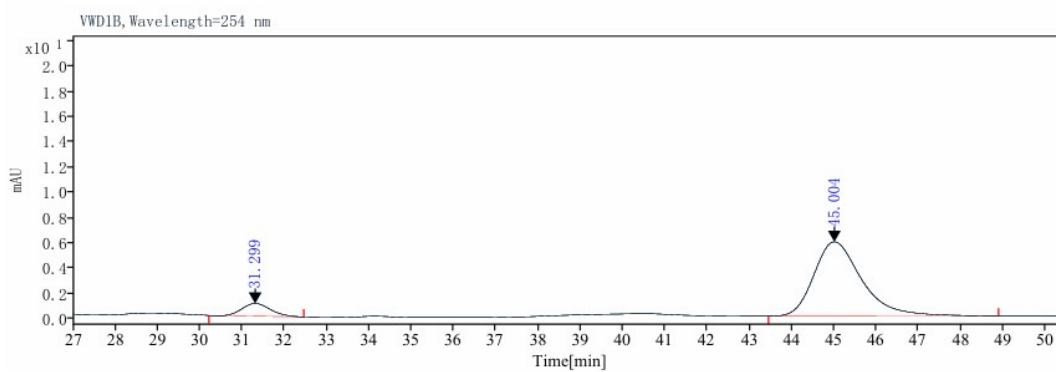

VWD1B, Wavelength=254 nm

| Ret. Time | Area   | Height | Area%  |
|-----------|--------|--------|--------|
| 31.299    | 46.94  | 1.00   | 9.20   |
| 45.004    | 463.41 | 5.89   | 90.80  |
| Total     | 510.35 | 6.89   | 100.00 |

**HPLC spectra of product 3h.**

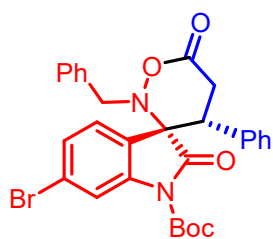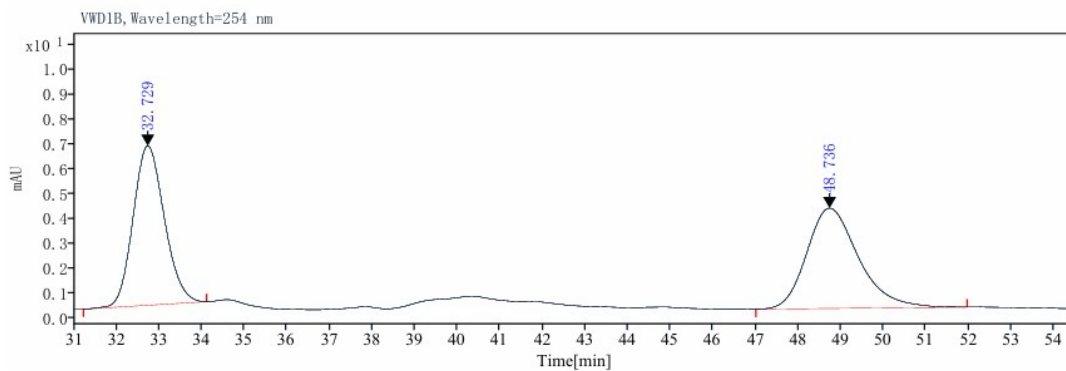

VWD1B, Wavelength=254 nm

| Ret. Time | Area   | Height | Area%  |
|-----------|--------|--------|--------|
| 32.729    | 327.40 | 6.42   | 48.99  |
| 48.736    | 340.90 | 4.04   | 51.01  |
| Total     | 668.30 | 10.47  | 100.00 |

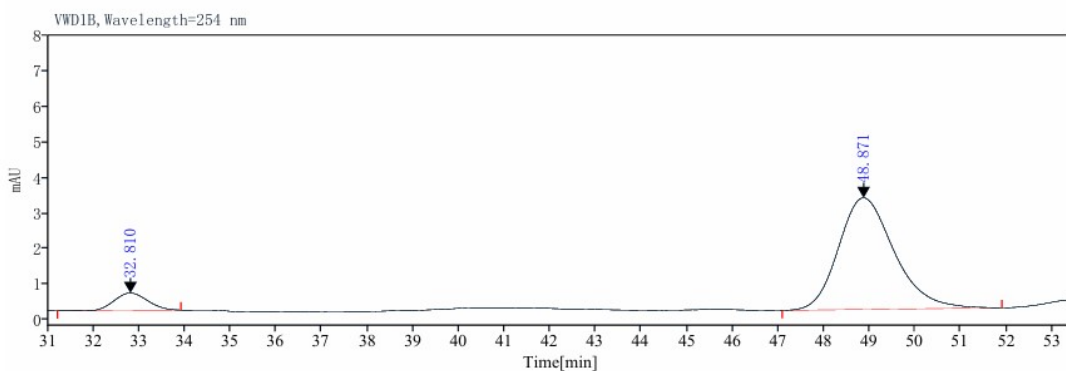

VWD1B, Wavelength=254 nm

| Ret. Time | Area   | Height | Area%  |
|-----------|--------|--------|--------|
| 32.810    | 24.18  | 0.49   | 8.31   |
| 48.871    | 266.95 | 3.15   | 91.69  |
| Total     | 291.13 | 3.64   | 100.00 |

**HPLC spectra of product 3i.**

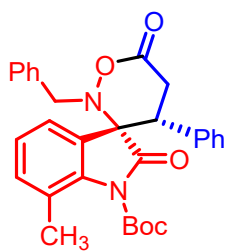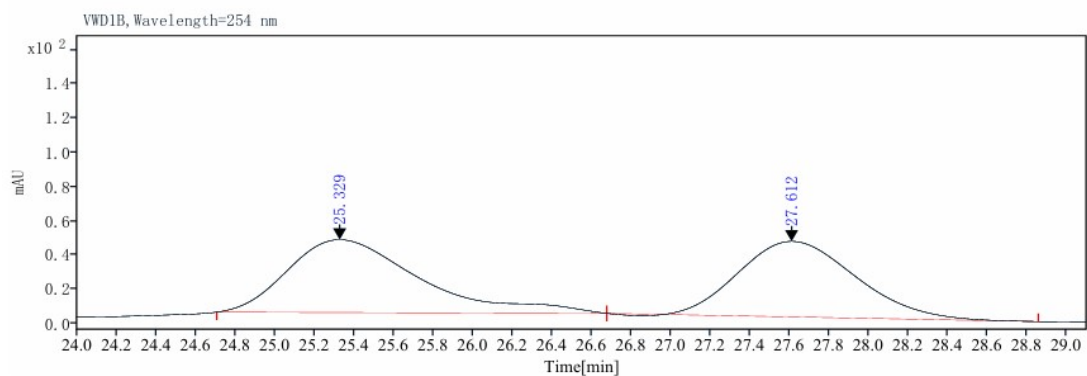

VWD1B, Wavelength=254 nm

| Ret. Time | Area    | Height | Area%  |
|-----------|---------|--------|--------|
| 25.329    | 1959.16 | 42.53  | 52.10  |
| 27.612    | 1801.50 | 44.10  | 47.90  |
| Total     | 3760.66 | 86.63  | 100.00 |

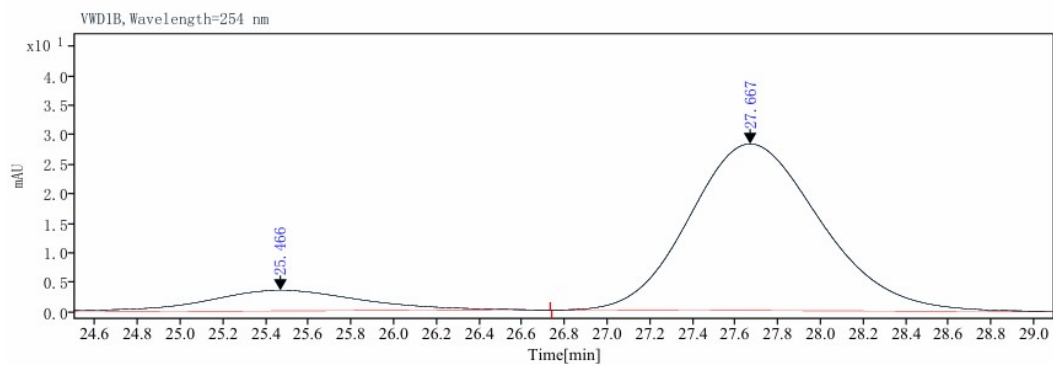

VWD1B, Wavelength=254 nm

| Ret. Time | Area    | Height | Area%  |
|-----------|---------|--------|--------|
| 25.466    | 178.93  | 3.49   | 12.86  |
| 27.667    | 1211.91 | 28.29  | 87.14  |
| Total     | 1390.84 | 31.78  | 100.00 |

HPLC spectra of product 3j.

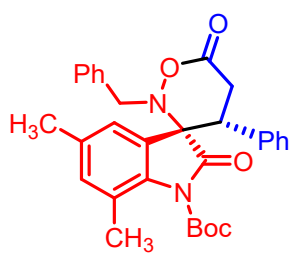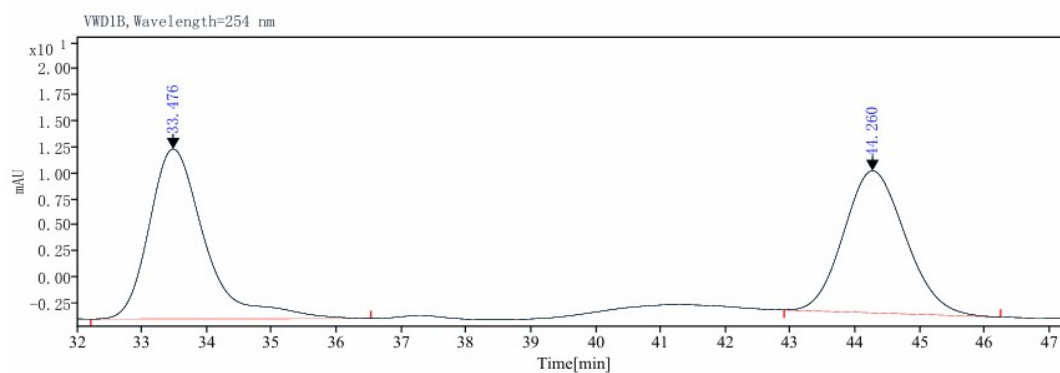

VWD1B, Wavelength=254 nm

| Ret. Time | Area    | Height | Area%  |
|-----------|---------|--------|--------|
| 33.476    | 973.73  | 16.34  | 51.87  |
| 44.260    | 903.67  | 13.66  | 48.13  |
| Total     | 1877.40 | 30.00  | 100.00 |

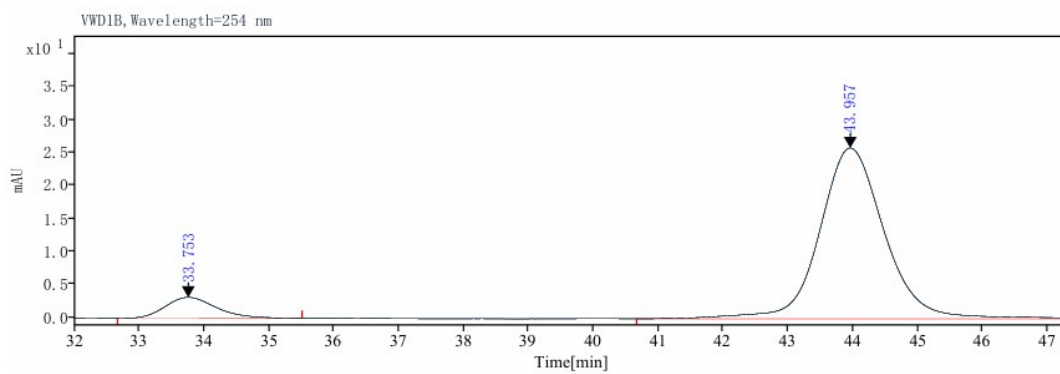

VWD1B, Wavelength=254 nm

| Ret. Time | Area    | Height | Area%  |
|-----------|---------|--------|--------|
| 33.753    | 173.77  | 3.18   | 8.74   |
| 43.957    | 1814.97 | 25.96  | 91.26  |
| Total     | 1988.74 | 29.14  | 100.00 |

**HPLC spectra of product 3k.**

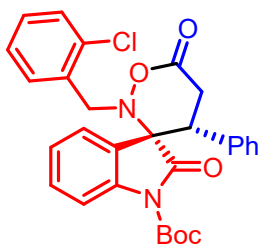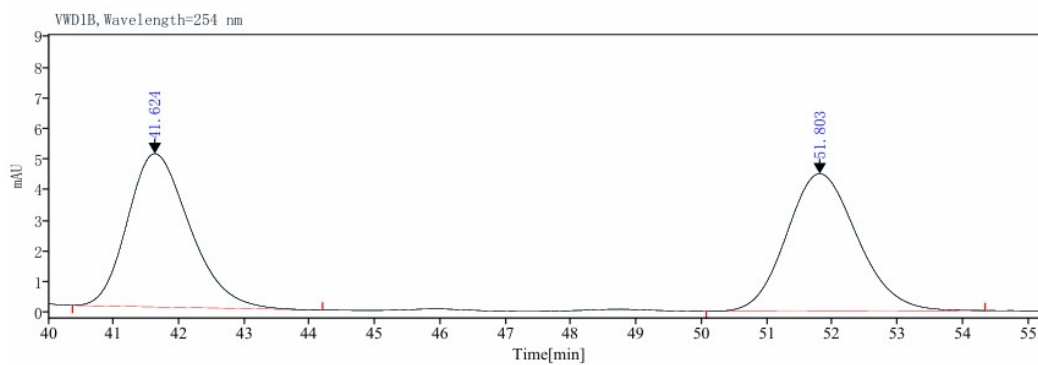

VWD1B, Wavelength=254 nm

| Ret. Time | Area   | Height | Area%  |
|-----------|--------|--------|--------|
| 41.624    | 331.88 | 5.01   | 49.50  |
| 51.803    | 338.65 | 4.49   | 50.50  |
| Total     | 670.53 | 9.50   | 100.00 |

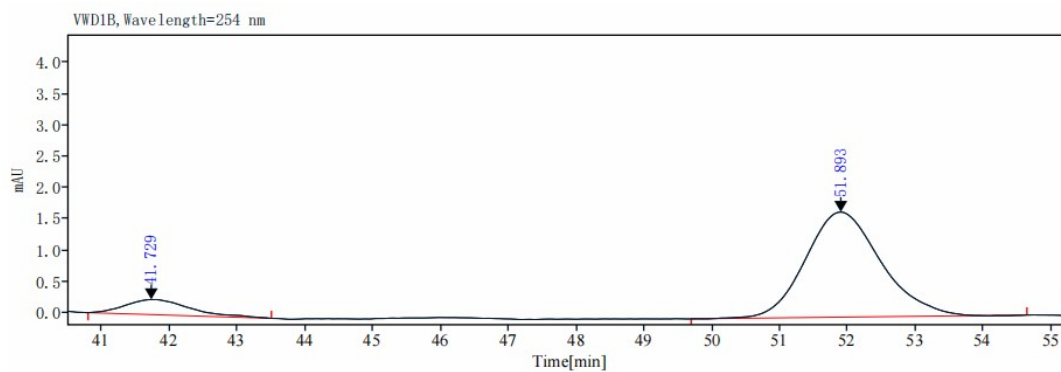

VWD1B, Wavelength=254 nm

| Ret. Time | Area   | Height | Area%  |
|-----------|--------|--------|--------|
| 41.729    | 15.92  | 0.24   | 10.94  |
| 51.893    | 129.61 | 1.68   | 89.06  |
| Total     | 145.53 | 1.92   | 100.00 |

HPLC spectra of product 3l.

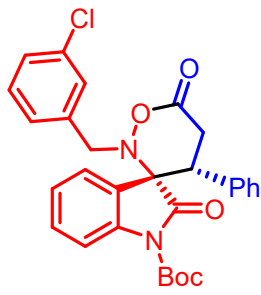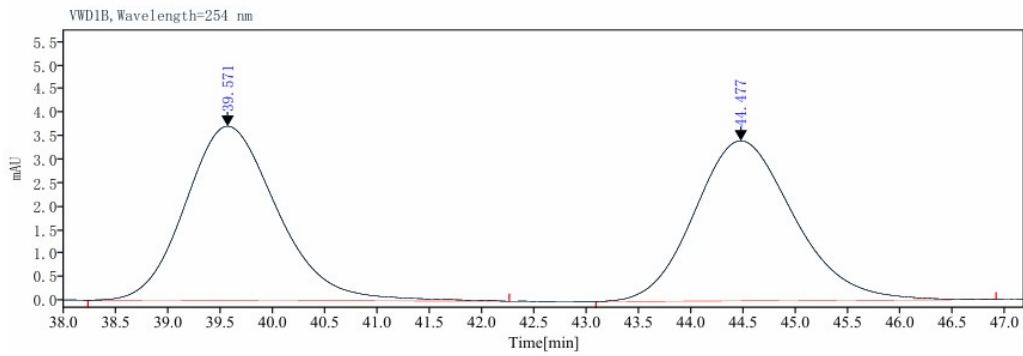

VWD1B, Wavelength=254 nm

| Ret. Time | Area   | Height | Area%  |
|-----------|--------|--------|--------|
| 39.571    | 226.74 | 3.71   | 50.20  |
| 44.477    | 224.96 | 3.40   | 49.80  |
| Total     | 451.69 | 7.11   | 100.00 |

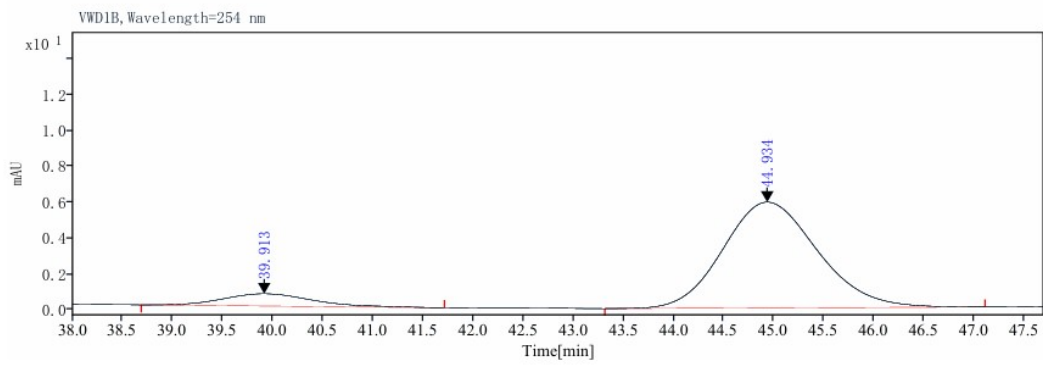

VWD1B, Wavelength=254 nm

| Ret. Time | Area   | Height | Area%  |
|-----------|--------|--------|--------|
| 39.913    | 42.59  | 0.69   | 9.87   |
| 44.934    | 388.72 | 5.91   | 90.13  |
| Total     | 431.31 | 6.60   | 100.00 |

### HPLC spectra of product 3m.

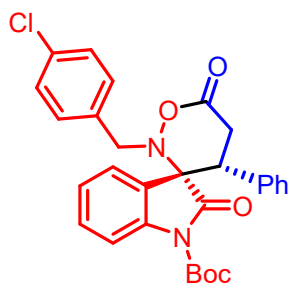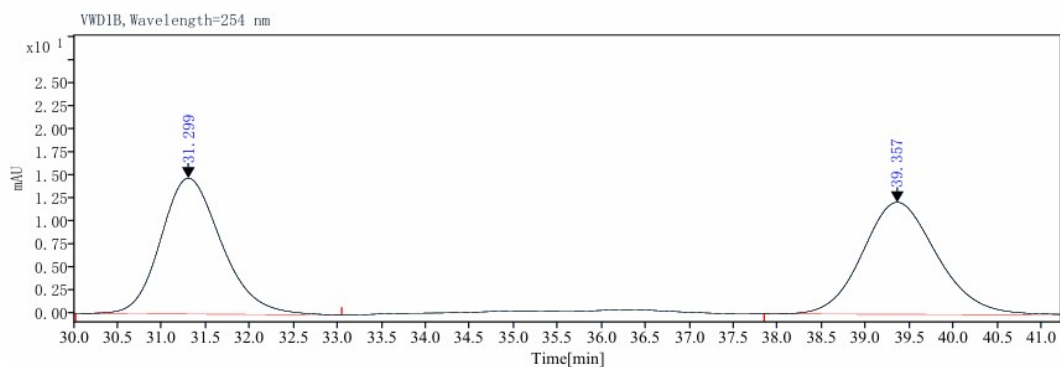

VWD1B, Wavelength=254 nm

| Ret. Time | Area    | Height | Area%  |
|-----------|---------|--------|--------|
| 31.299    | 711.36  | 14.80  | 49.70  |
| 39.357    | 719.86  | 12.20  | 50.30  |
| Total     | 1431.22 | 27.00  | 100.00 |

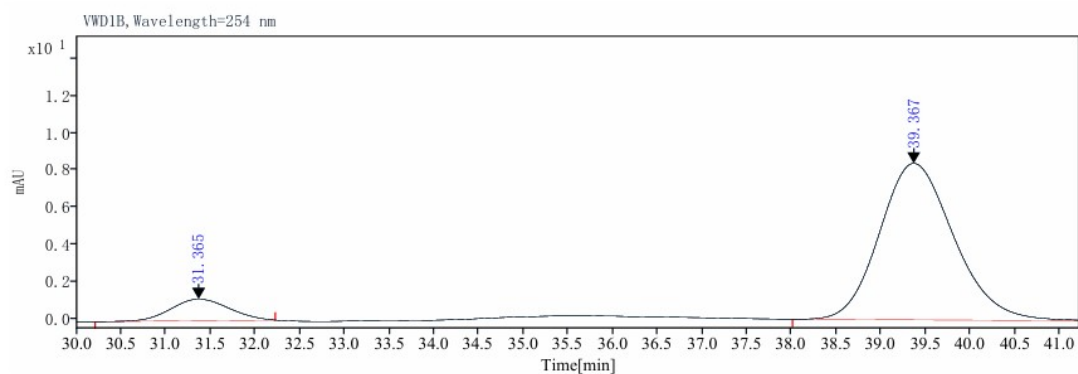

VWD1B, Wavelength=254 nm

| Ret. Time | Area   | Height | Area%  |
|-----------|--------|--------|--------|
| 31.365    | 52.47  | 1.17   | 9.72   |
| 39.367    | 487.54 | 8.43   | 90.28  |
| Total     | 540.01 | 9.59   | 100.00 |

### HPLC spectra of product 3n.

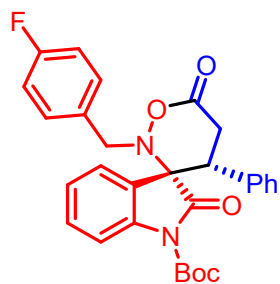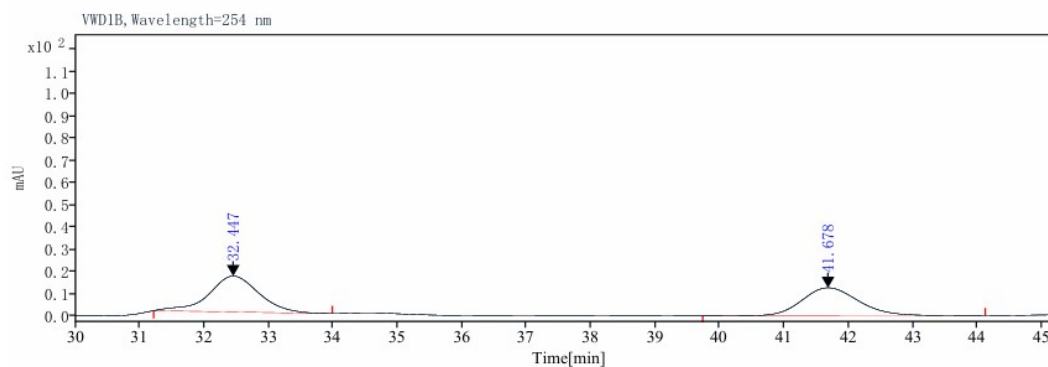

VWD1B, Wavelength=254 nm

| Ret. Time | Area    | Height | Area%  |
|-----------|---------|--------|--------|
| 32.447    | 873.18  | 16.17  | 52.73  |
| 41.678    | 782.84  | 12.67  | 47.27  |
| Total     | 1656.02 | 28.84  | 100.00 |

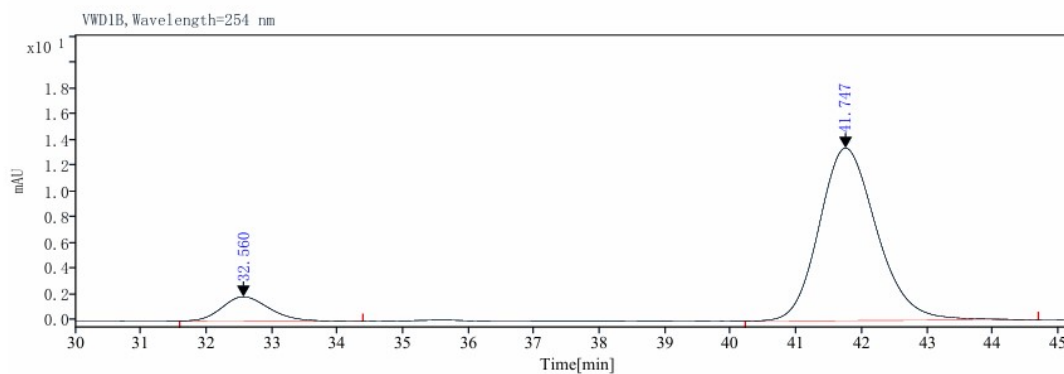

VWD1B, Wavelength=254 nm

| Ret. Time | Area   | Height | Area%  |
|-----------|--------|--------|--------|
| 32.560    | 94.00  | 1.88   | 10.29  |
| 41.747    | 819.42 | 13.40  | 89.71  |
| Total     | 913.42 | 15.28  | 100.00 |

### HPLC spectra of product 3o.

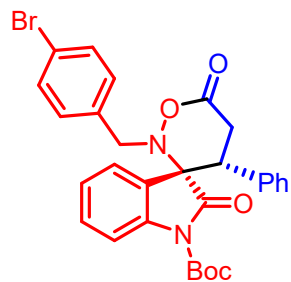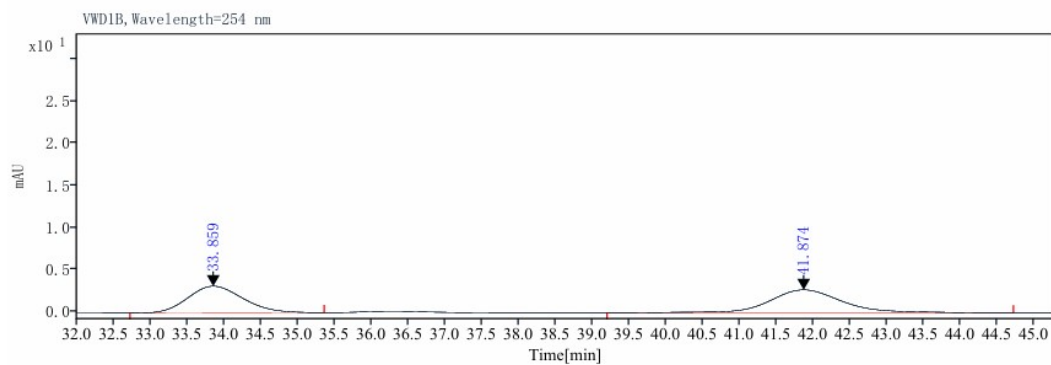

VWD1B, Wavelength=254 nm

| Ret. Time | Area   | Height | Area%  |
|-----------|--------|--------|--------|
| 33.859    | 166.06 | 3.18   | 46.23  |
| 41.874    | 193.14 | 2.75   | 53.77  |
| Total     | 359.20 | 5.93   | 100.00 |

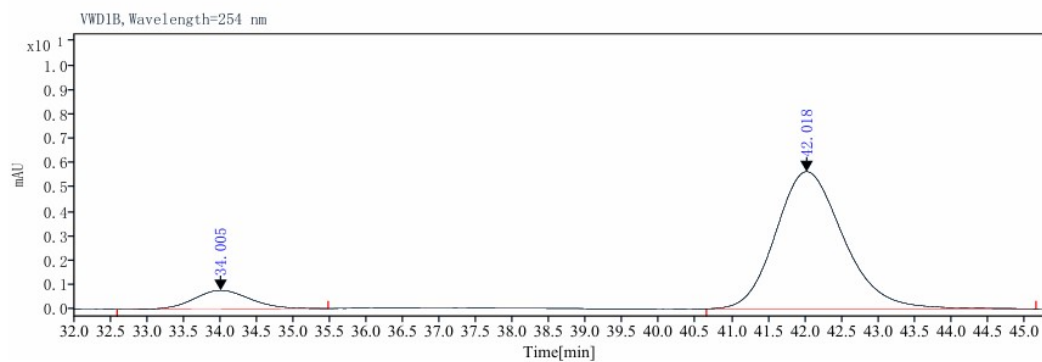

VWD1B, Wavelength=254 nm

| Ret. Time | Area   | Height | Area%  |
|-----------|--------|--------|--------|
| 34.005    | 39.99  | 0.76   | 9.98   |
| 42.018    | 360.80 | 5.61   | 90.02  |
| Total     | 400.79 | 6.37   | 100.00 |

### HPLC spectra of product 3p.

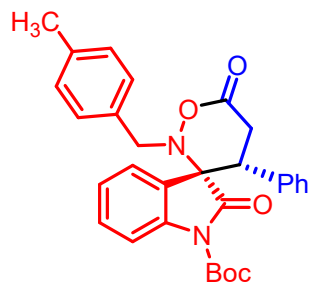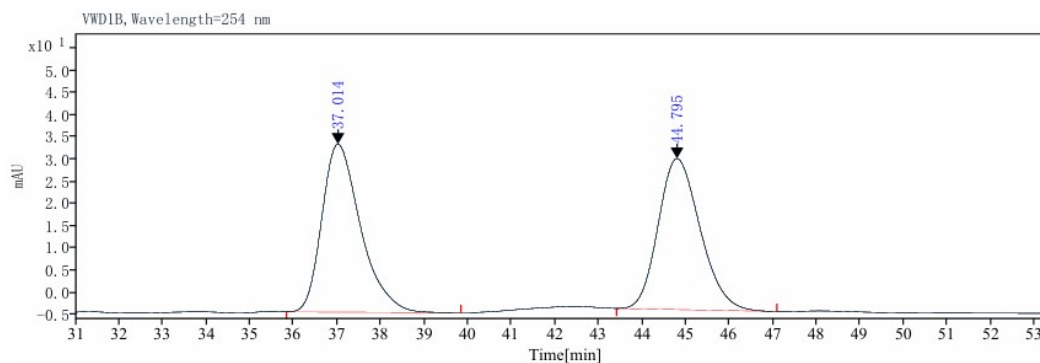

VWD1B, Wavelength=254 nm

| Ret. Time | Area    | Height | Area%  |
|-----------|---------|--------|--------|
| 37.014    | 2331.06 | 37.83  | 50.61  |
| 44.795    | 2274.59 | 34.00  | 49.39  |
| Total     | 4605.65 | 71.83  | 100.00 |

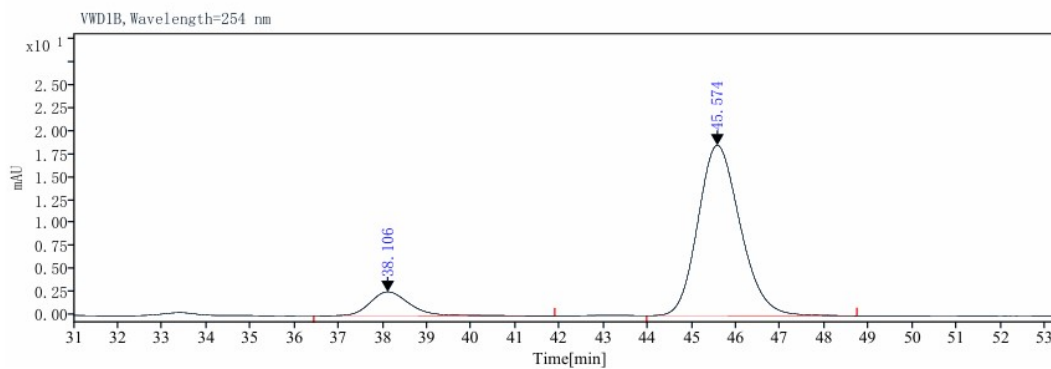

VWD1B, Wavelength=254 nm

| Ret. Time | Area    | Height | Area%  |
|-----------|---------|--------|--------|
| 38.106    | 164.33  | 2.62   | 11.77  |
| 45.574    | 1231.80 | 18.54  | 88.23  |
| Total     | 1396.13 | 21.16  | 100.00 |

### HPLC spectra of product 3q.

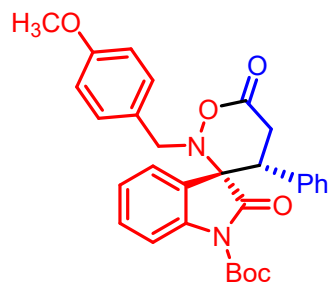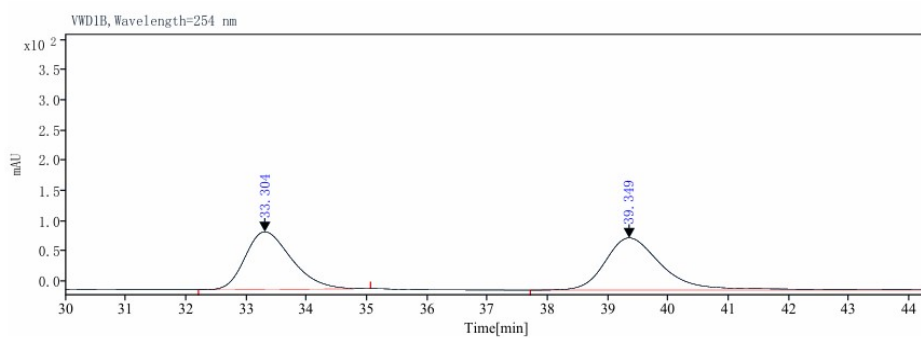

VWD1B, Wavelength=254 nm

| Ret. Time | Area     | Height | Area%  |
|-----------|----------|--------|--------|
| 33.304    | 5095.99  | 95.50  | 47.12  |
| 39.349    | 5718.47  | 86.38  | 52.88  |
| Total     | 10814.46 | 181.88 | 100.00 |

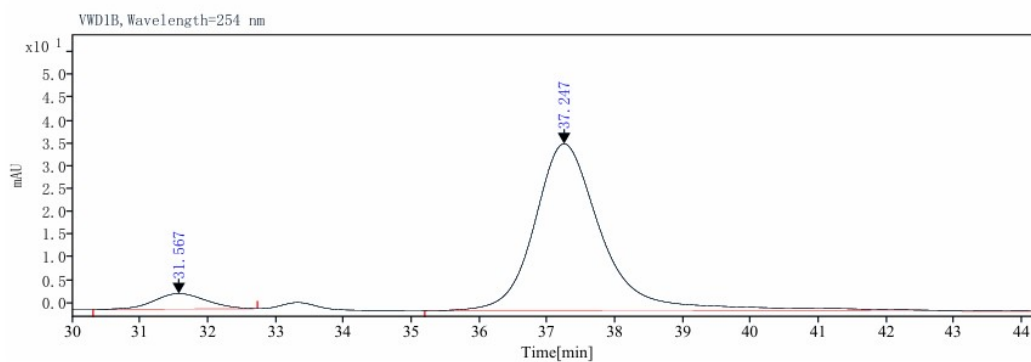

VWD1B, Wavelength=254 nm

| Ret. Time | Area    | Height | Area%  |
|-----------|---------|--------|--------|
| 31.567    | 180.62  | 3.39   | 6.56   |
| 37.247    | 2572.79 | 36.61  | 93.44  |
| Total     | 2753.41 | 40.00  | 100.00 |

## HPLC spectra of product 3r.

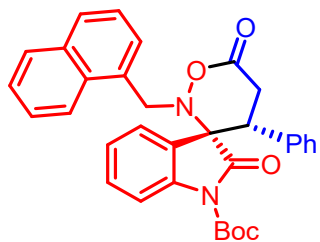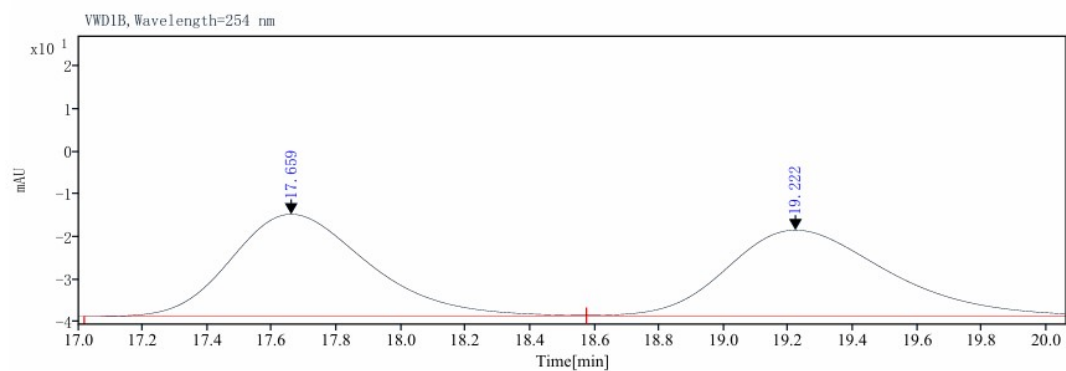

VWD1B, Wavelength=254 nm

| Ret. Time | Area    | Height | Area%  |
|-----------|---------|--------|--------|
| 17.659    | 712.36  | 24.01  | 50.12  |
| 19.222    | 708.82  | 20.28  | 49.88  |
| Total     | 1421.18 | 44.29  | 100.00 |

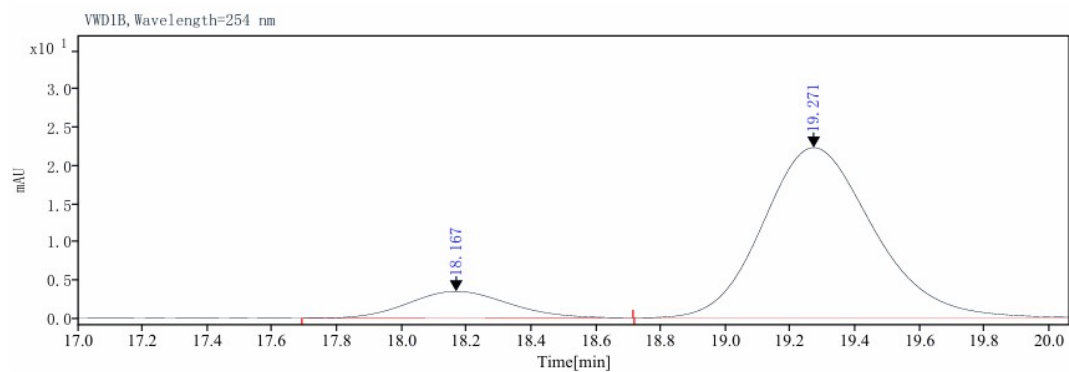

VWD1B, Wavelength=254 nm

| Ret. Time | Area   | Height | Area%  |
|-----------|--------|--------|--------|
| 18.167    | 75.74  | 3.51   | 12.49  |
| 19.271    | 530.77 | 22.31  | 87.51  |
| Total     | 606.51 | 25.82  | 100.00 |

### HPLC spectra of product 3s.

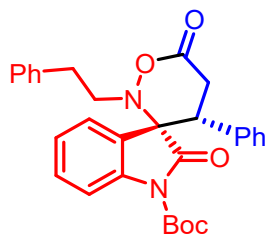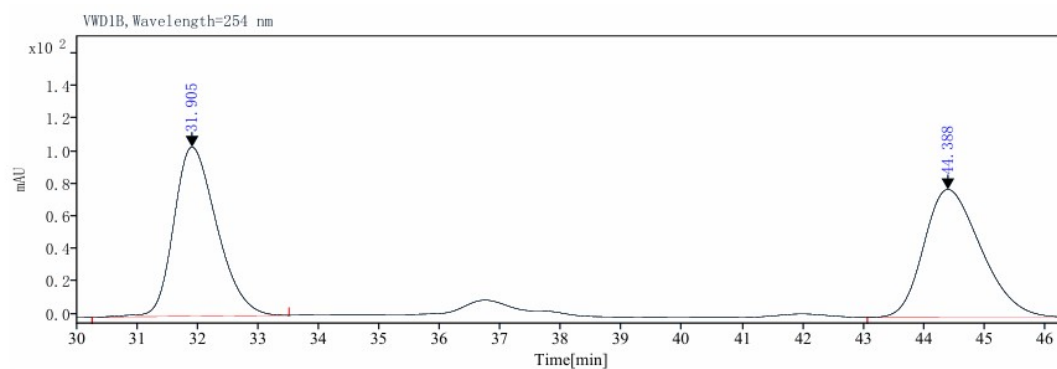

VWD1B, Wavelength=254 nm

| Ret. Time | Area     | Height | Area%  |
|-----------|----------|--------|--------|
| 31.905    | 5131.33  | 103.92 | 49.86  |
| 44.388    | 5160.97  | 78.58  | 50.14  |
| Total     | 10292.31 | 182.50 | 100.00 |

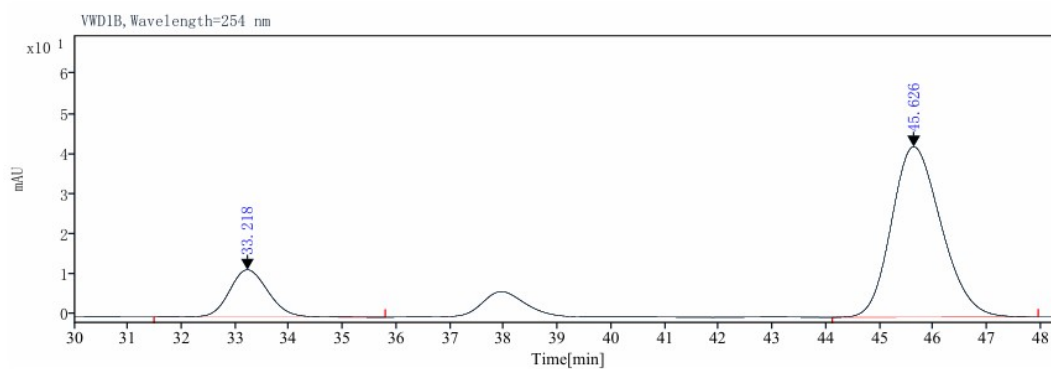

VWD1B, Wavelength=254 nm

| Ret. Time | Area    | Height | Area%  |
|-----------|---------|--------|--------|
| 33.218    | 593.30  | 11.82  | 17.84  |
| 45.626    | 2731.90 | 42.55  | 82.16  |
| Total     | 3325.20 | 54.36  | 100.00 |

### HPLC spectra of product 3t.

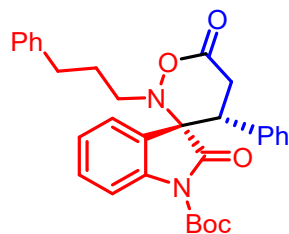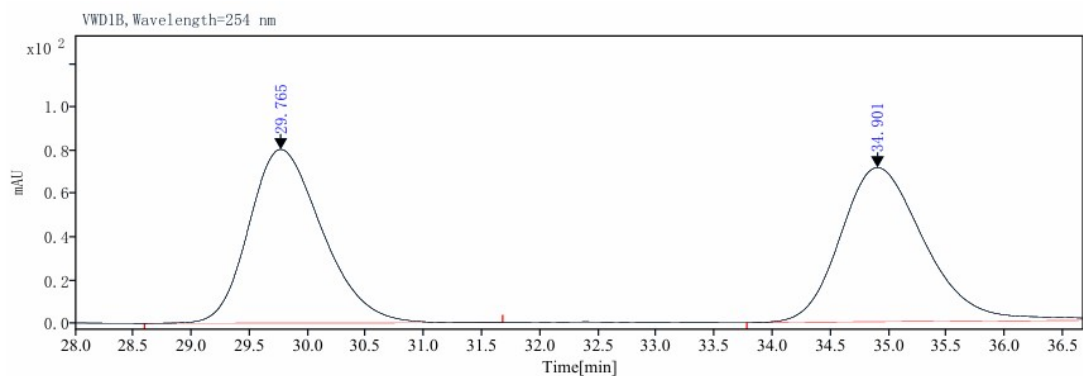

VWD1B, Wavelength=254 nm

| Ret. Time | Area    | Height | Area%  |
|-----------|---------|--------|--------|
| 29.765    | 3523.23 | 80.34  | 49.42  |
| 34.901    | 3605.77 | 71.31  | 50.58  |
| Total     | 7129.00 | 151.65 | 100.00 |

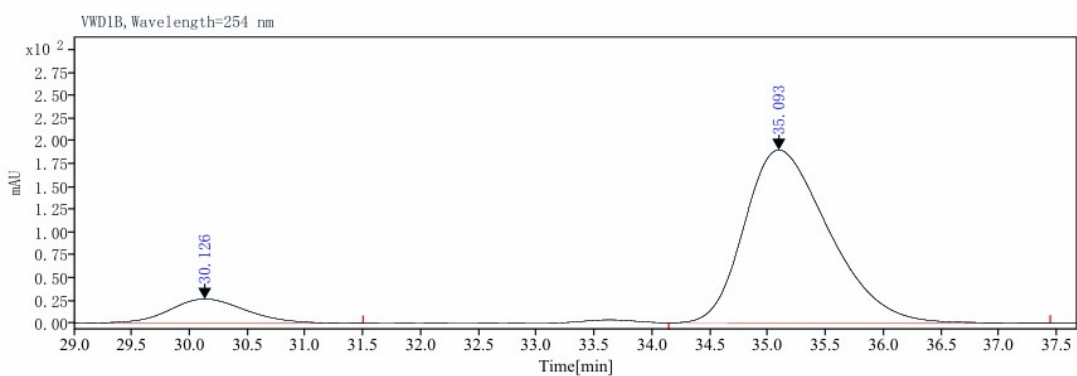

VWD1B, Wavelength=254 nm

| Ret. Time | Area     | Height | Area%  |
|-----------|----------|--------|--------|
| 30.126    | 1243.58  | 26.72  | 11.38  |
| 35.093    | 9682.29  | 190.11 | 88.62  |
| Total     | 10925.87 | 216.83 | 100.00 |

### HPLC spectra of product 3u.

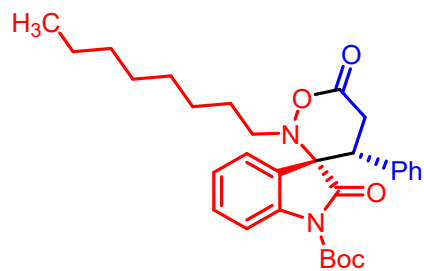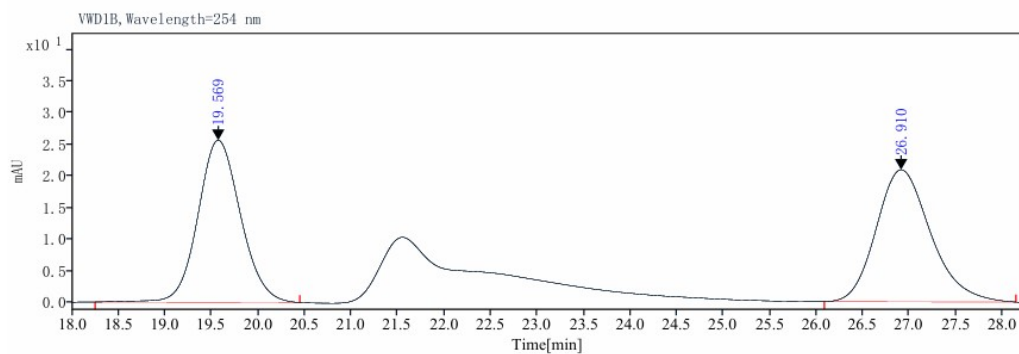

VWD1B, Wavelength=254 nm

| Ret. Time | Area    | Height | Area%  |
|-----------|---------|--------|--------|
| 19.569    | 816.67  | 25.62  | 49.06  |
| 26.910    | 847.83  | 20.88  | 50.94  |
| Total     | 1664.50 | 46.50  | 100.00 |

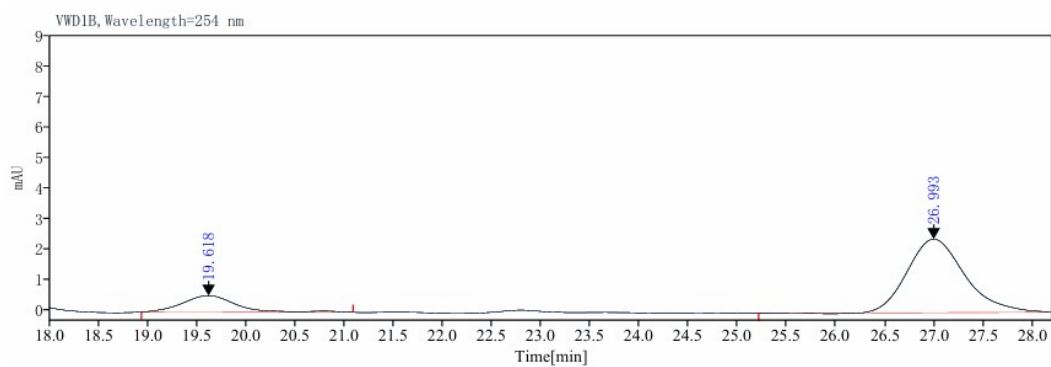

VWD1B, Wavelength=254 nm

| Ret. Time | Area   | Height | Area%  |
|-----------|--------|--------|--------|
| 19.618    | 20.87  | 0.54   | 17.44  |
| 26.993    | 98.81  | 2.43   | 82.56  |
| Total     | 119.69 | 2.97   | 100.00 |

### HPLC spectra of product 3v.

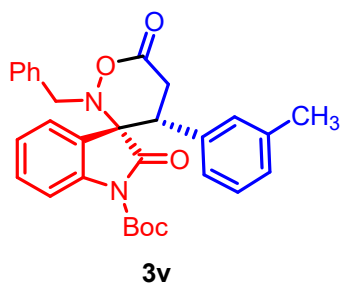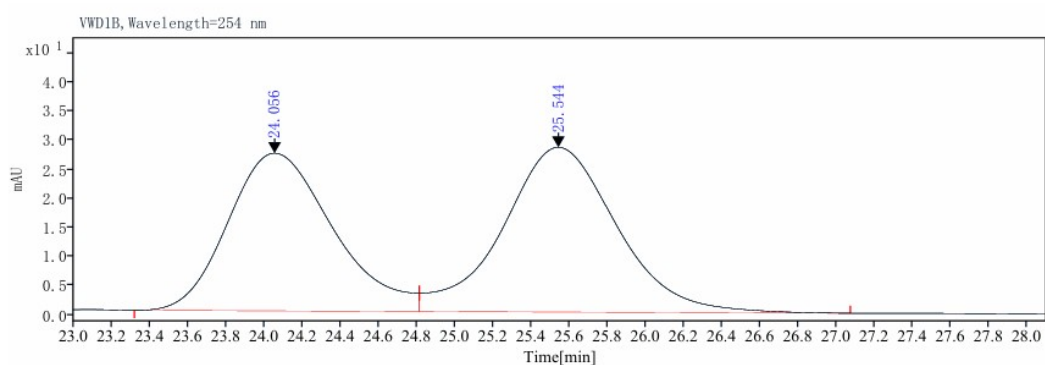

VWD1B, Wavelength=254 nm

| Ret. Time | Area    | Height | Area%  |
|-----------|---------|--------|--------|
| 24.056    | 1032.95 | 27.13  | 46.74  |
| 25.544    | 1176.97 | 28.34  | 53.26  |
| Total     | 2209.91 | 55.46  | 100.00 |

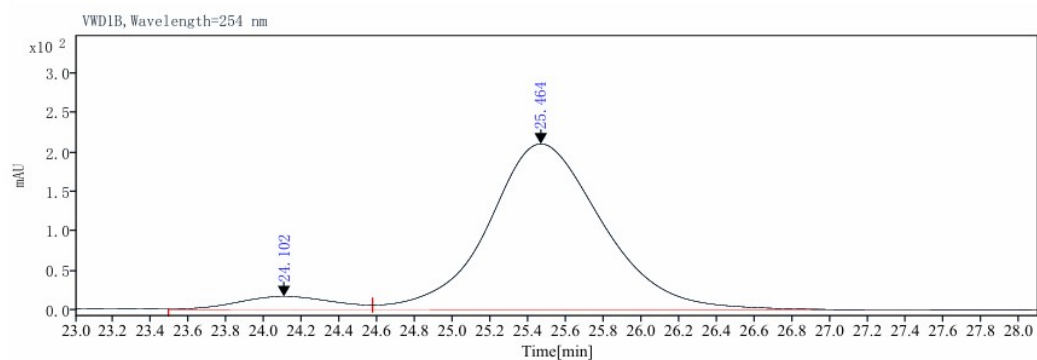

VWD1B, Wavelength=254 nm

| Ret. Time | Area    | Height | Area%  |
|-----------|---------|--------|--------|
| 24.102    | 607.84  | 16.82  | 6.35   |
| 25.464    | 8958.63 | 210.18 | 93.65  |
| Total     | 9566.47 | 227.00 | 100.00 |

### HPLC spectra of product 3w.

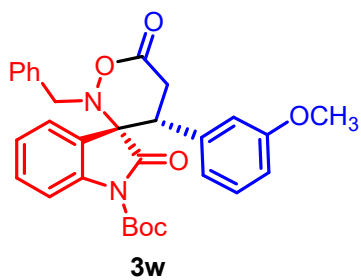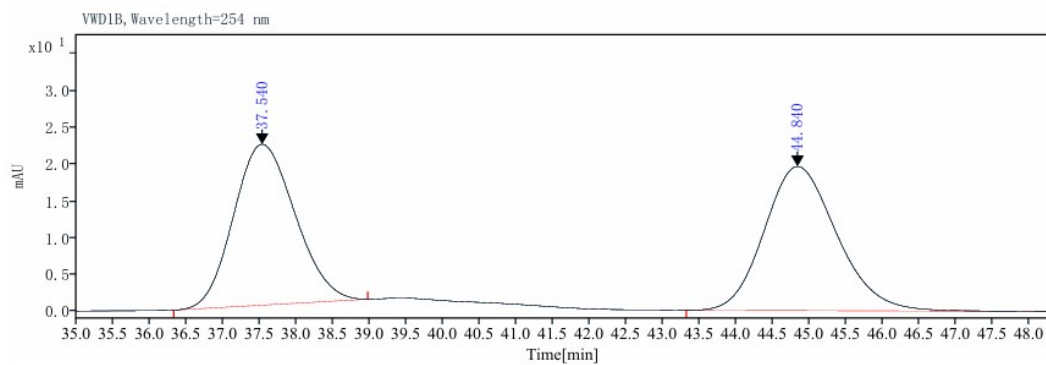

VWD1B, Wavelength=254 nm

| Ret. Time | Area    | Height | Area%  |
|-----------|---------|--------|--------|
| 37.540    | 1275.01 | 21.86  | 48.65  |
| 44.840    | 1345.54 | 19.58  | 51.35  |
| Total     | 2620.55 | 41.43  | 100.00 |

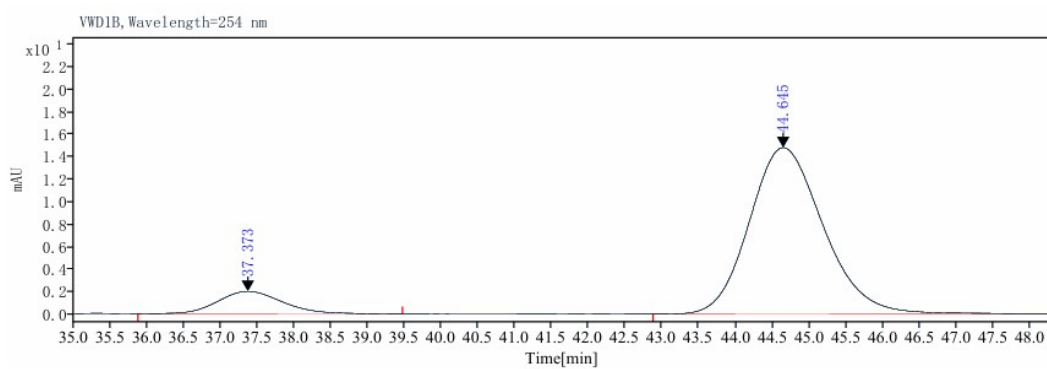

VWD1B, Wavelength=254 nm

| Ret. Time | Area    | Height | Area%  |
|-----------|---------|--------|--------|
| 37.373    | 124.10  | 2.01   | 10.72  |
| 44.645    | 1033.30 | 14.78  | 89.28  |
| Total     | 1157.41 | 16.79  | 100.00 |

### HPLC spectra of product 3x.

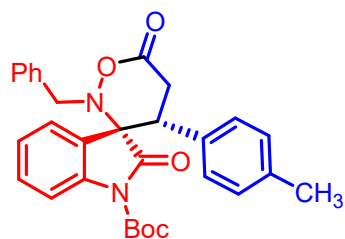

**3x**

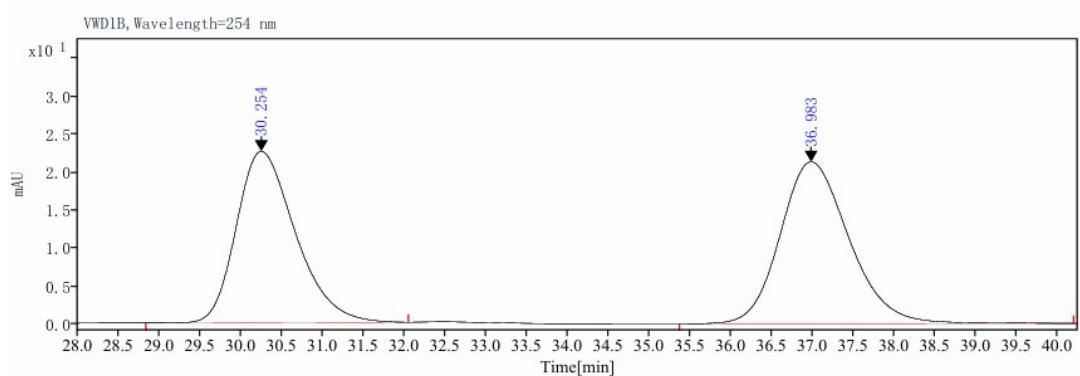

VWD1B, Wavelength=254 nm

| Ret. Time | Area    | Height | Area%  |
|-----------|---------|--------|--------|
| 30.254    | 1132.50 | 22.55  | 47.59  |
| 36.983    | 1247.24 | 21.30  | 52.41  |
| Total     | 2379.74 | 43.84  | 100.00 |

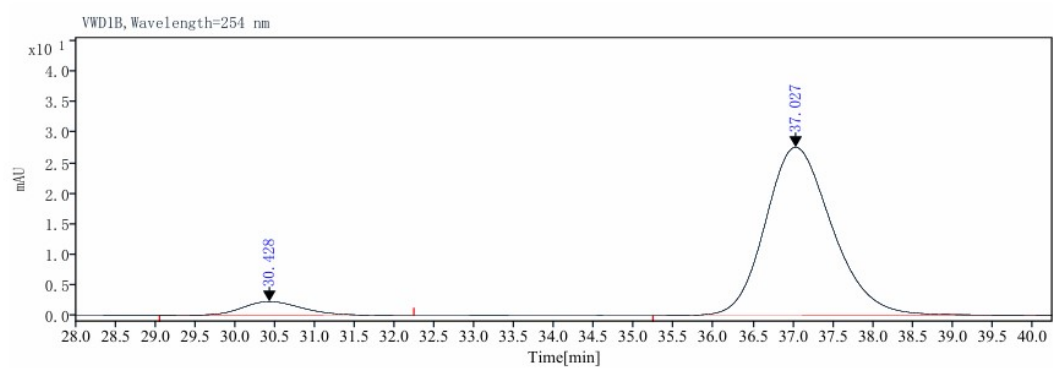

VWD1B, Wavelength=254 nm

| Ret. Time | Area    | Height | Area%  |
|-----------|---------|--------|--------|
| 30.428    | 120.27  | 2.27   | 6.94   |
| 37.027    | 1611.68 | 27.61  | 93.06  |
| Total     | 1731.95 | 29.88  | 100.00 |

## HPLC spectra of product 3y.

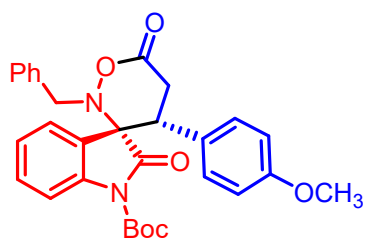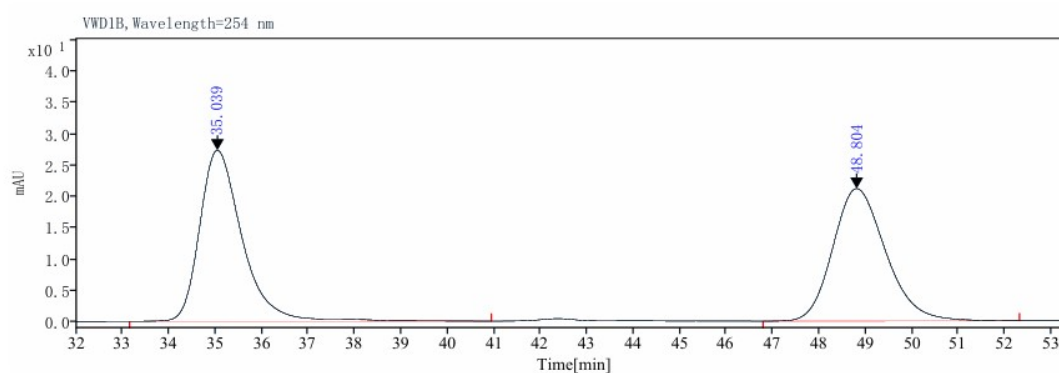

VWD1B, Wavelength=254 nm

| Ret. Time | Area    | Height | Area%  |
|-----------|---------|--------|--------|
| 35.039    | 1731.32 | 27.29  | 50.88  |
| 48.804    | 1671.21 | 21.14  | 49.12  |
| Total     | 3402.53 | 48.43  | 100.00 |

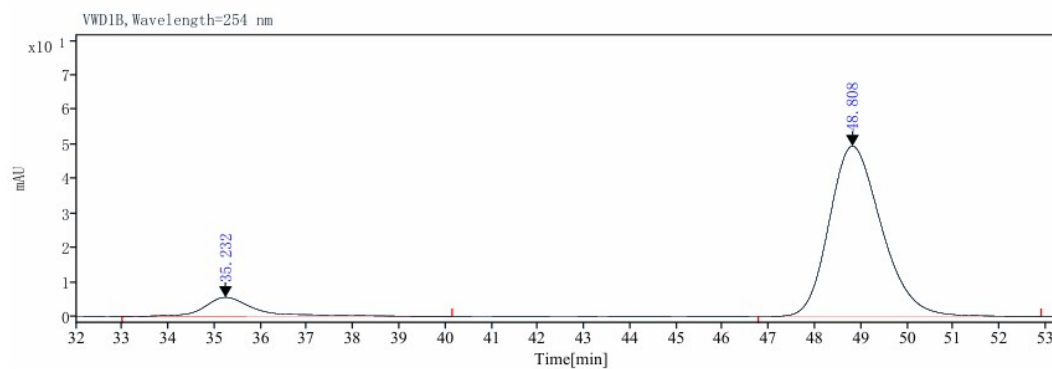

VWD1B, Wavelength=254 nm

| Ret. Time | Area    | Height | Area%  |
|-----------|---------|--------|--------|
| 35.232    | 431.64  | 5.55   | 10.02  |
| 48.808    | 3874.48 | 49.36  | 89.98  |
| Total     | 4306.12 | 54.91  | 100.00 |
